# Supplementary material for: Quantifying the contribution of shipping NO x emissions to the marine nitrogen inventory – a case study for the western Baltic Sea
Source: Copernicus journal article supplement (doi:10.5194/os-16-115-2020), 2020-01-21

— model      ◆ observation

station DMU547, depth: 0 m – 10 m

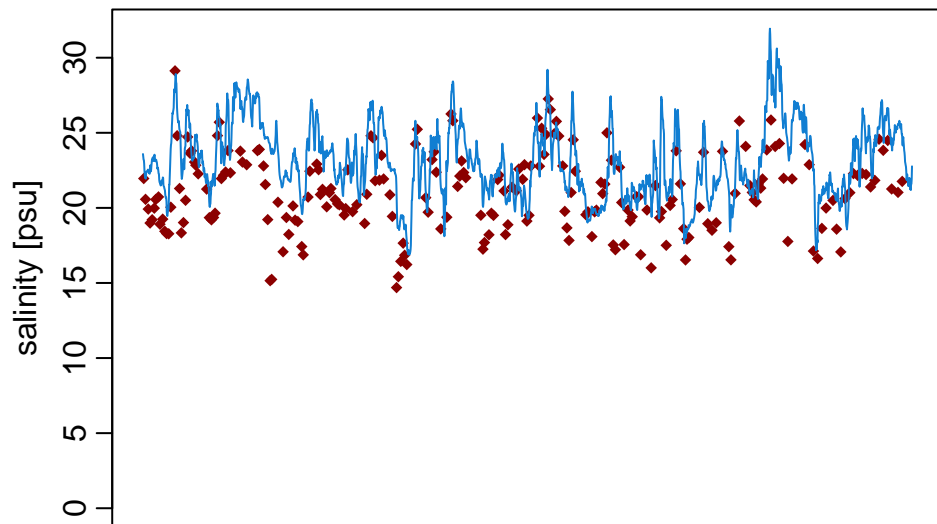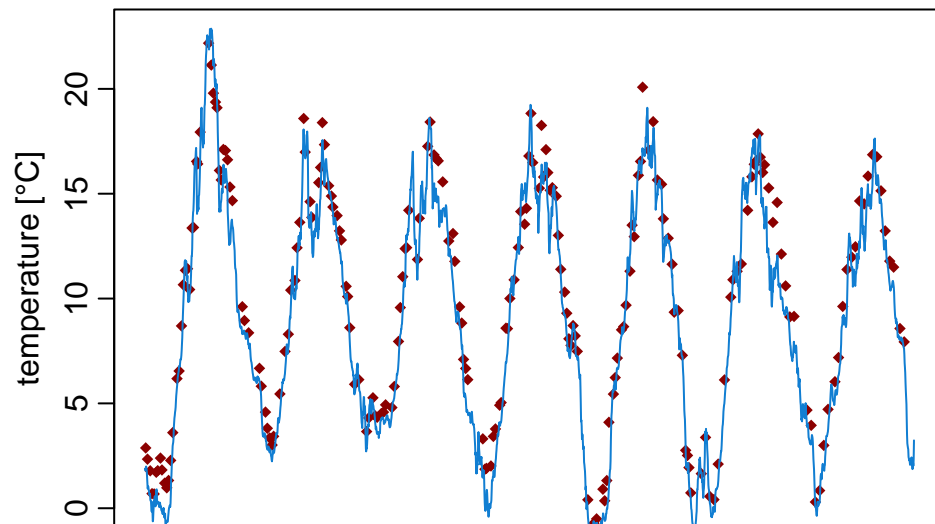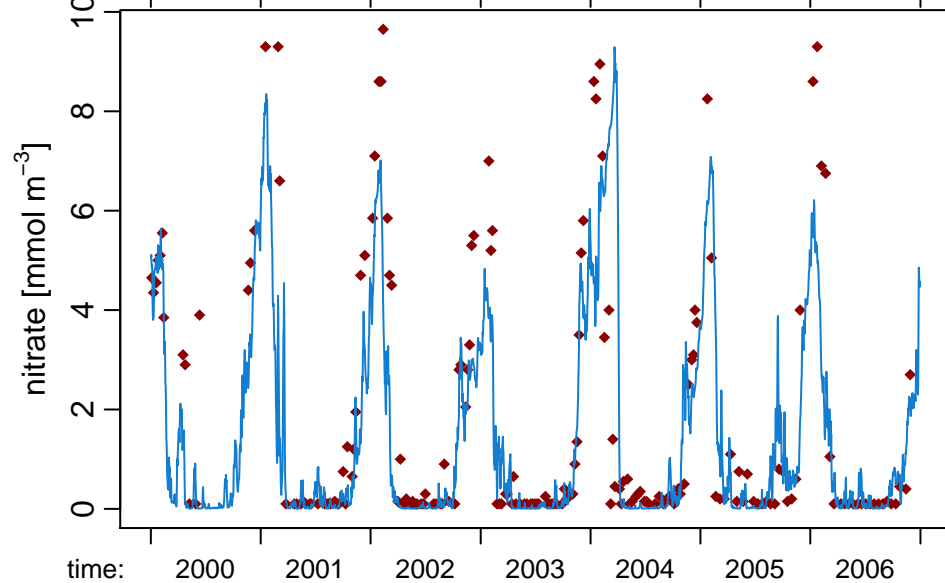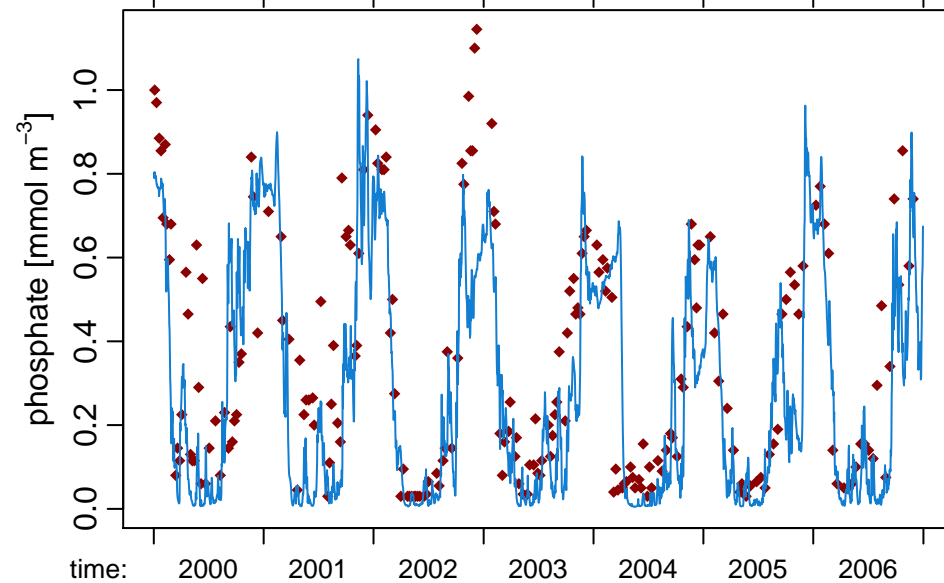

— model      ◆ observation

station OMBMPN1, depth: 0 m – 10 m

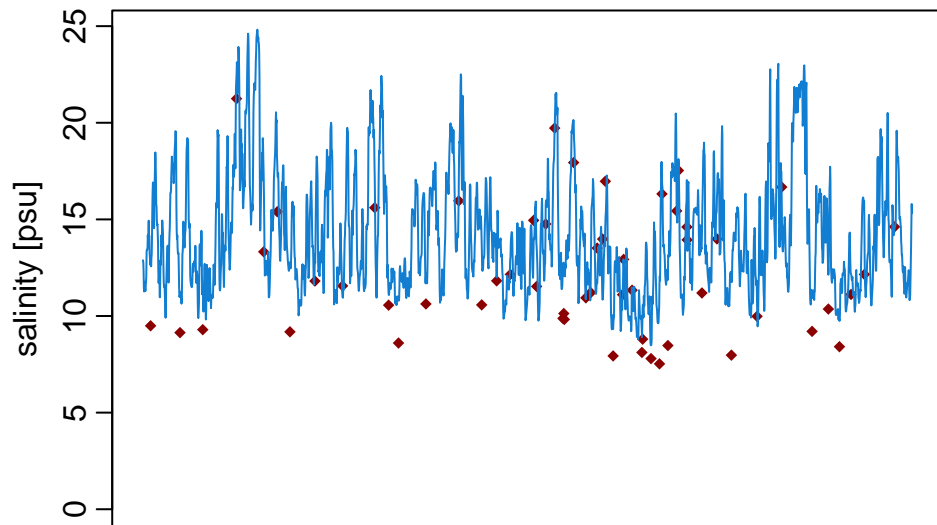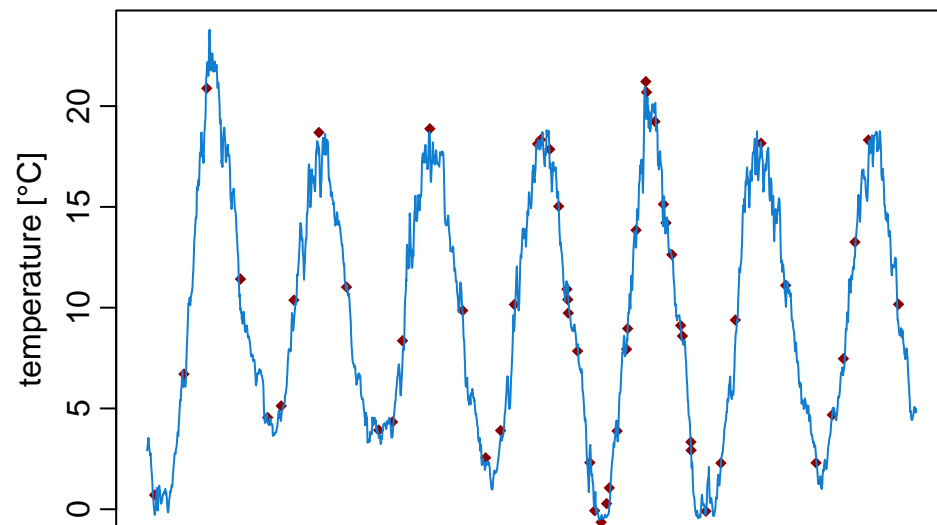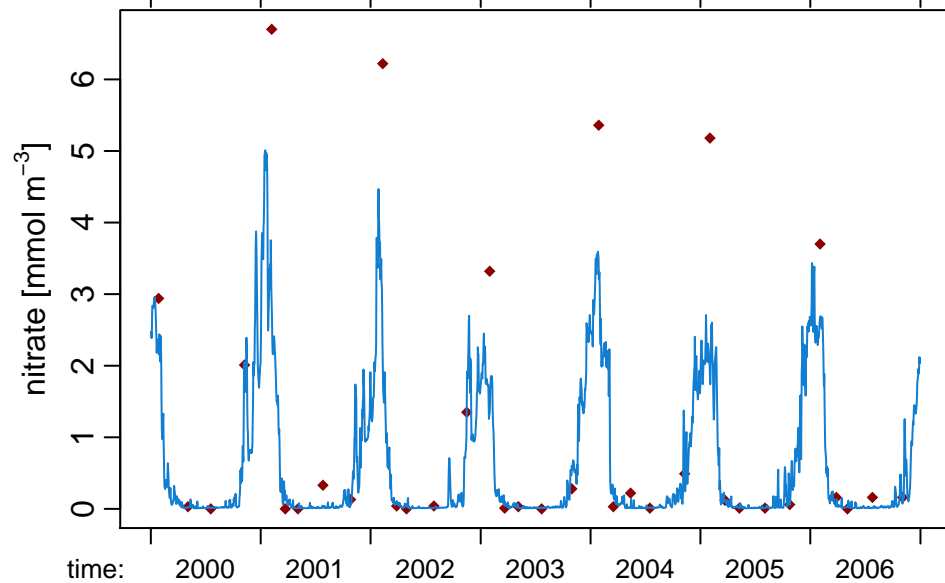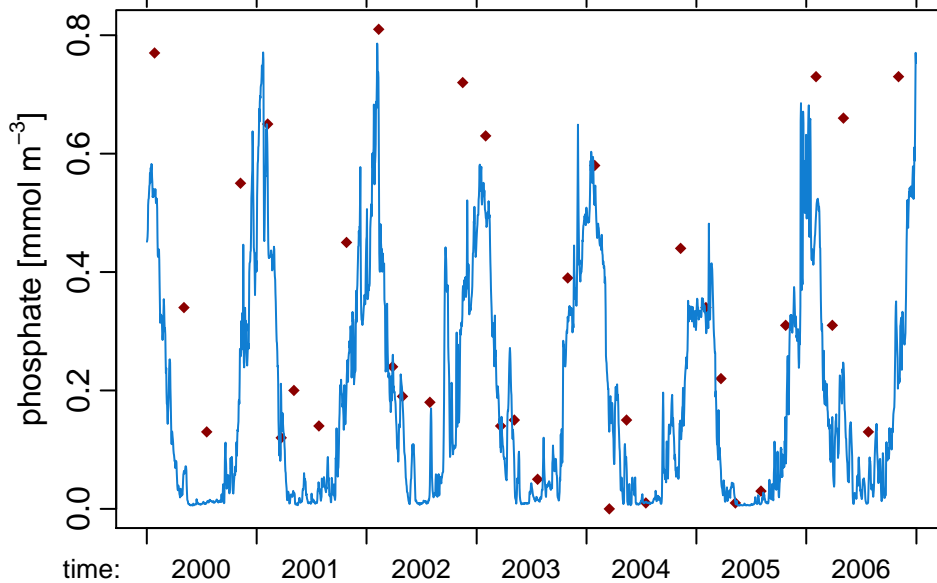

— model      ◆ observation

station OMBMPM2, depth: 0 m – 10 m

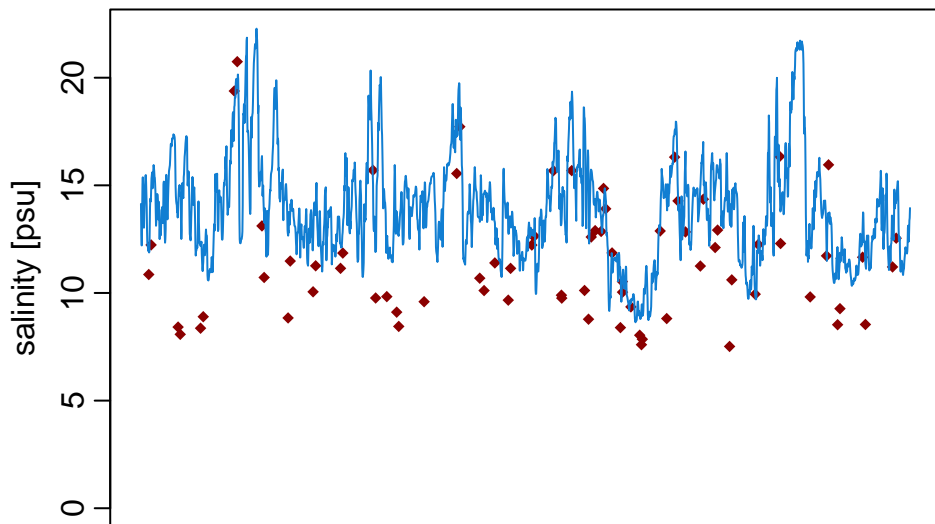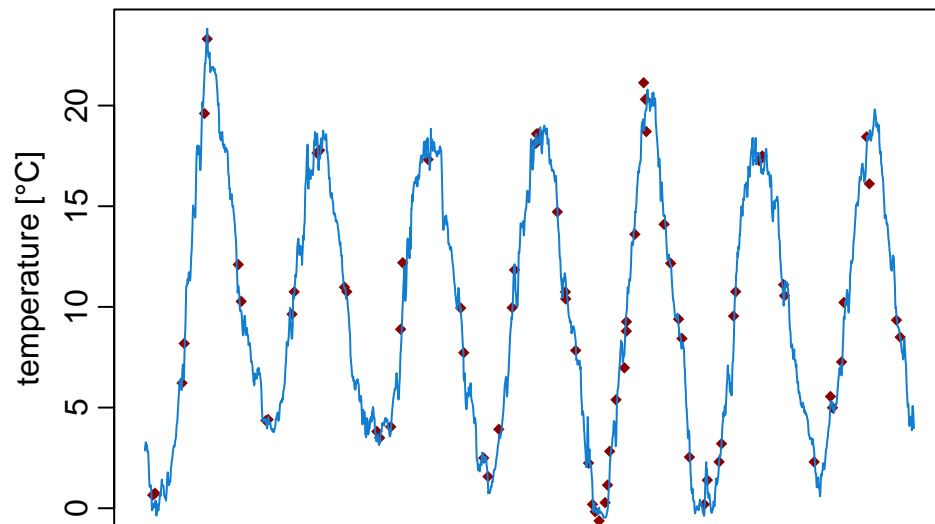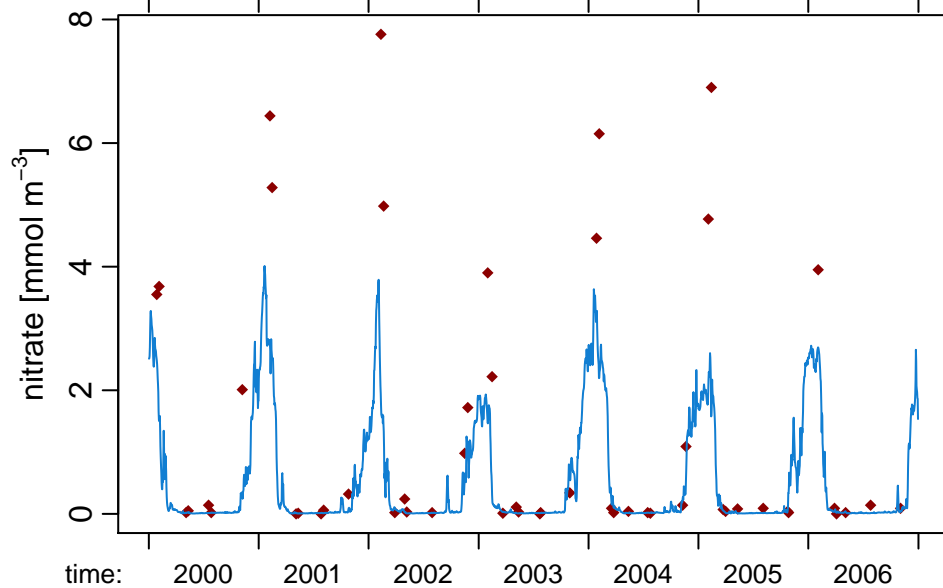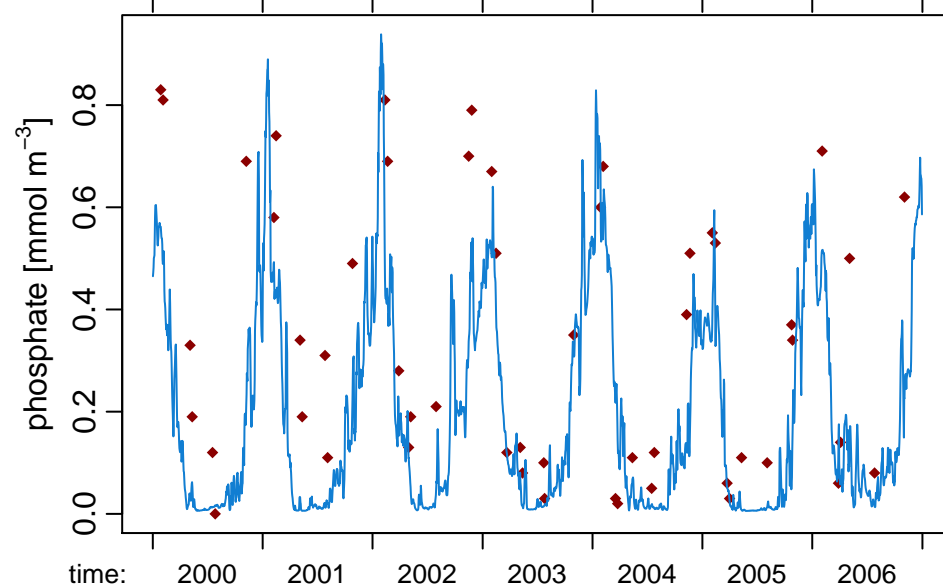

— model      ◆ observation

station OMBBPM, depth: 0 m – 10 m

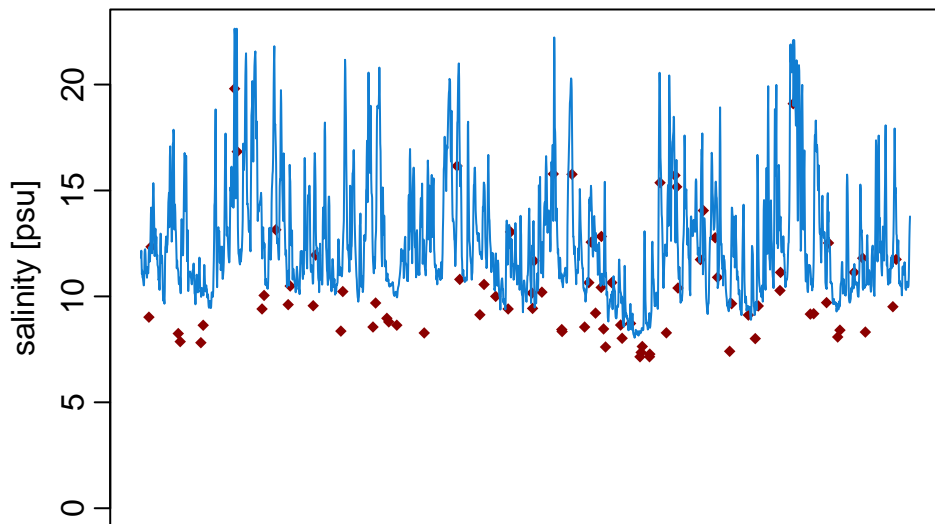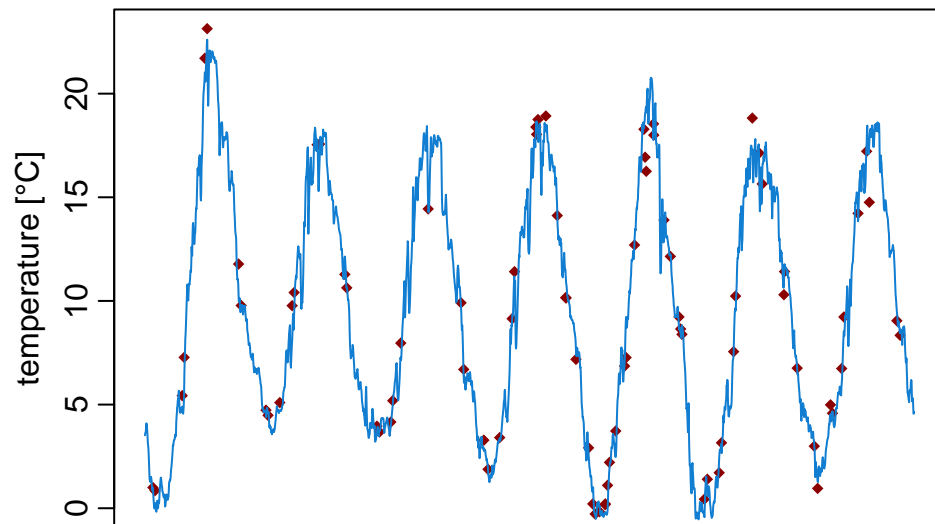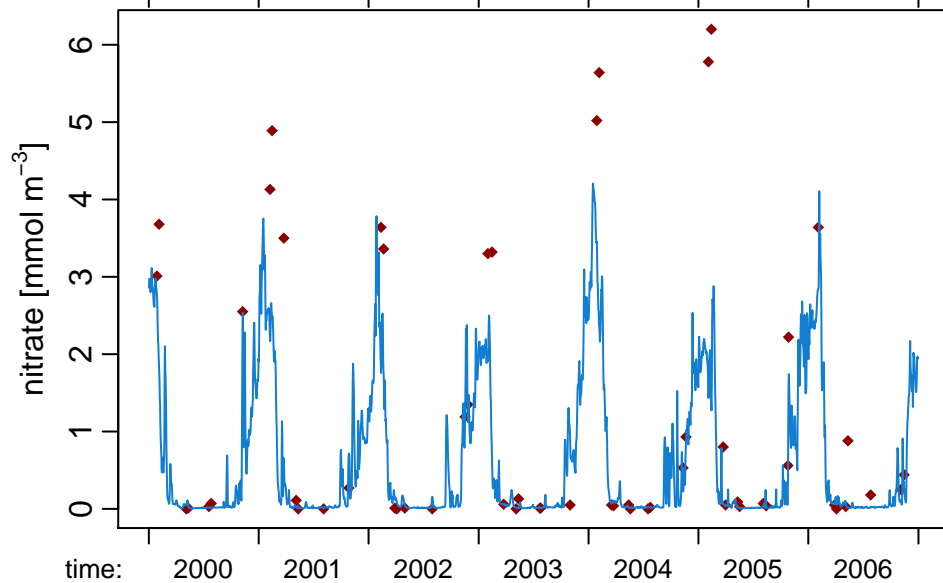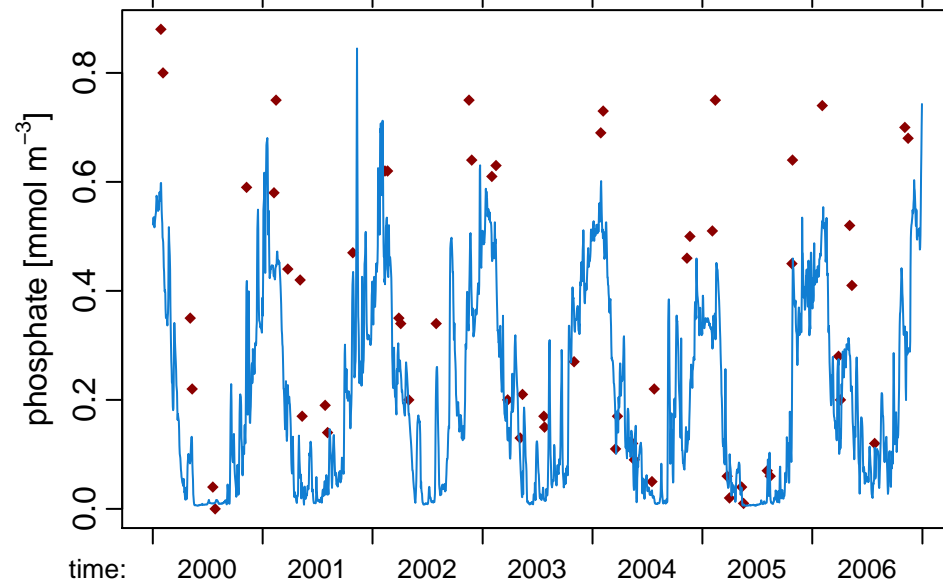

— model      ◆ observation

station OMBMPK8, depth: 0 m – 10 m

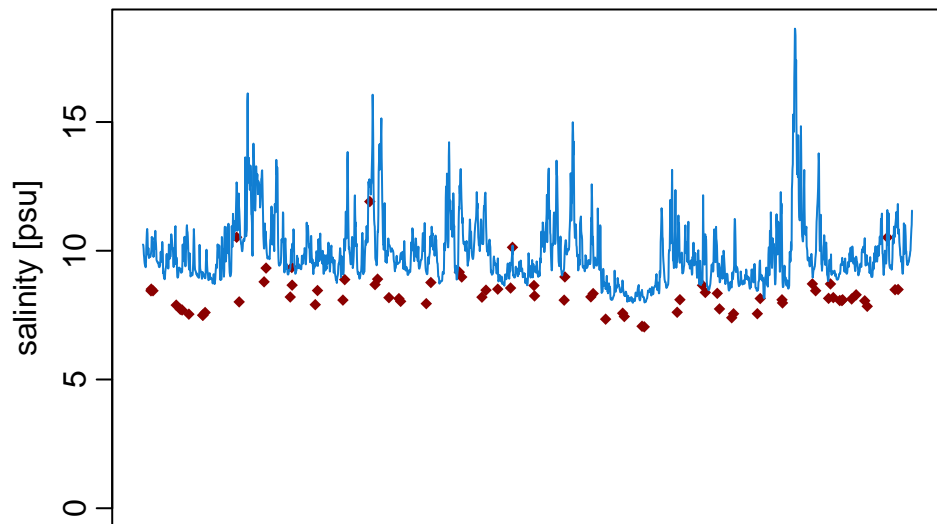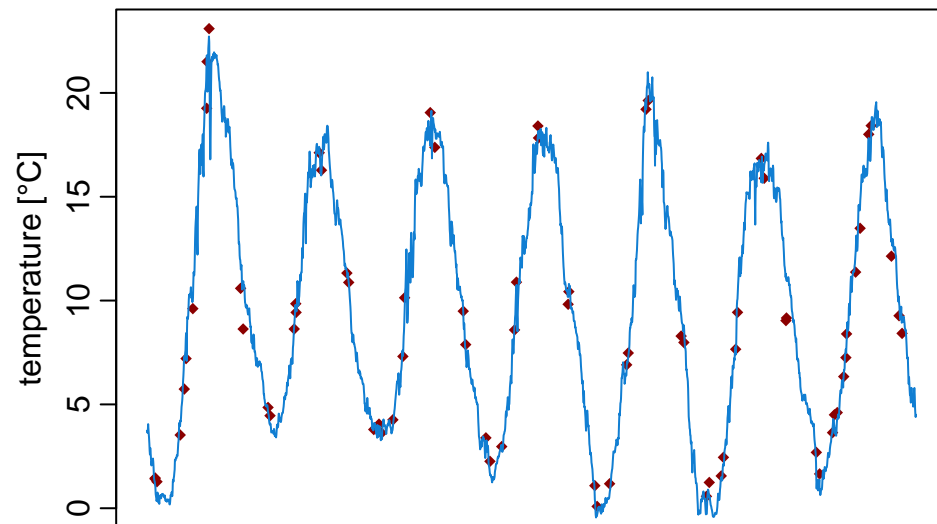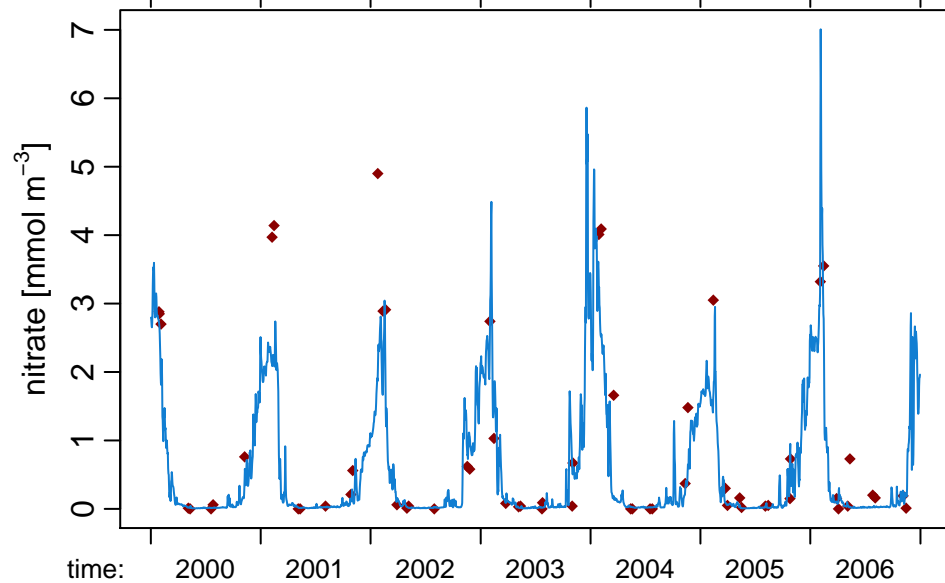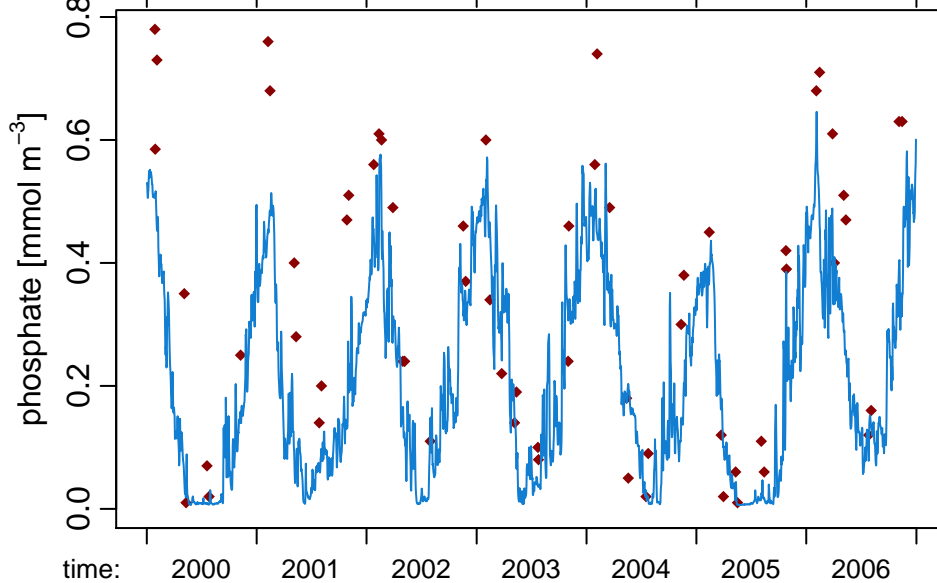

— model      ◆ observation

station BY2, depth: 0 m – 10 m

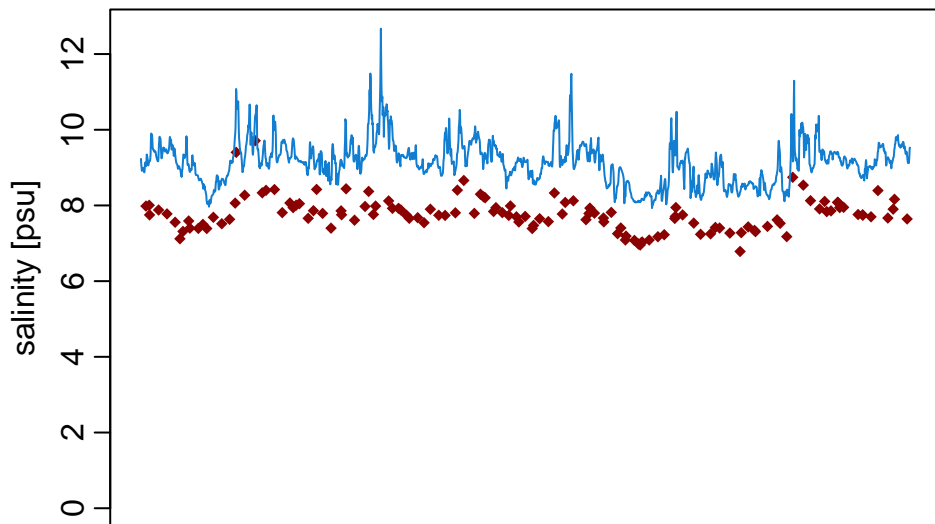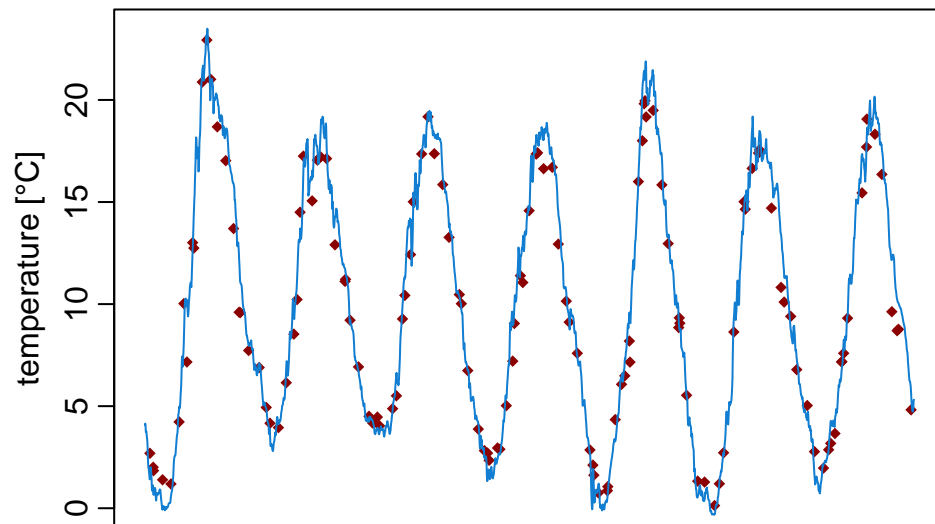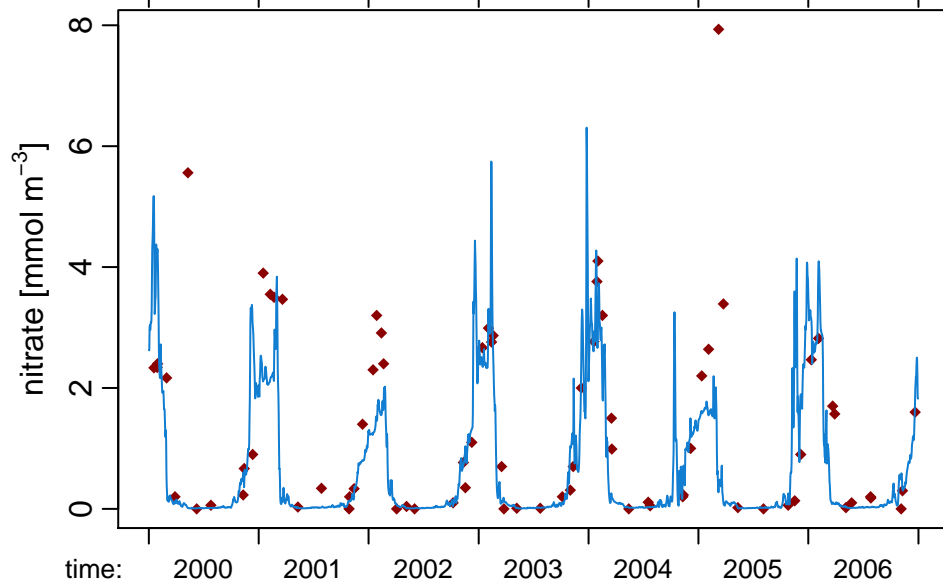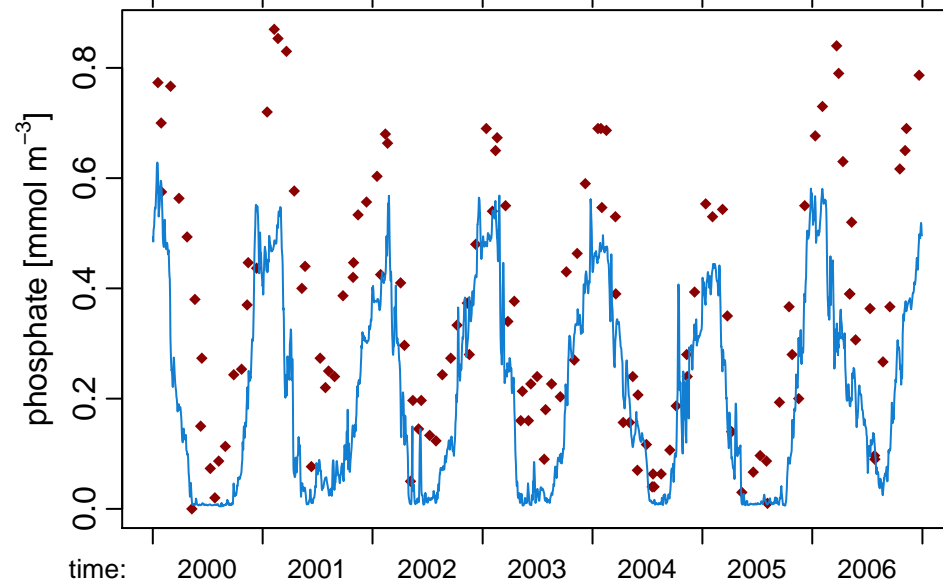

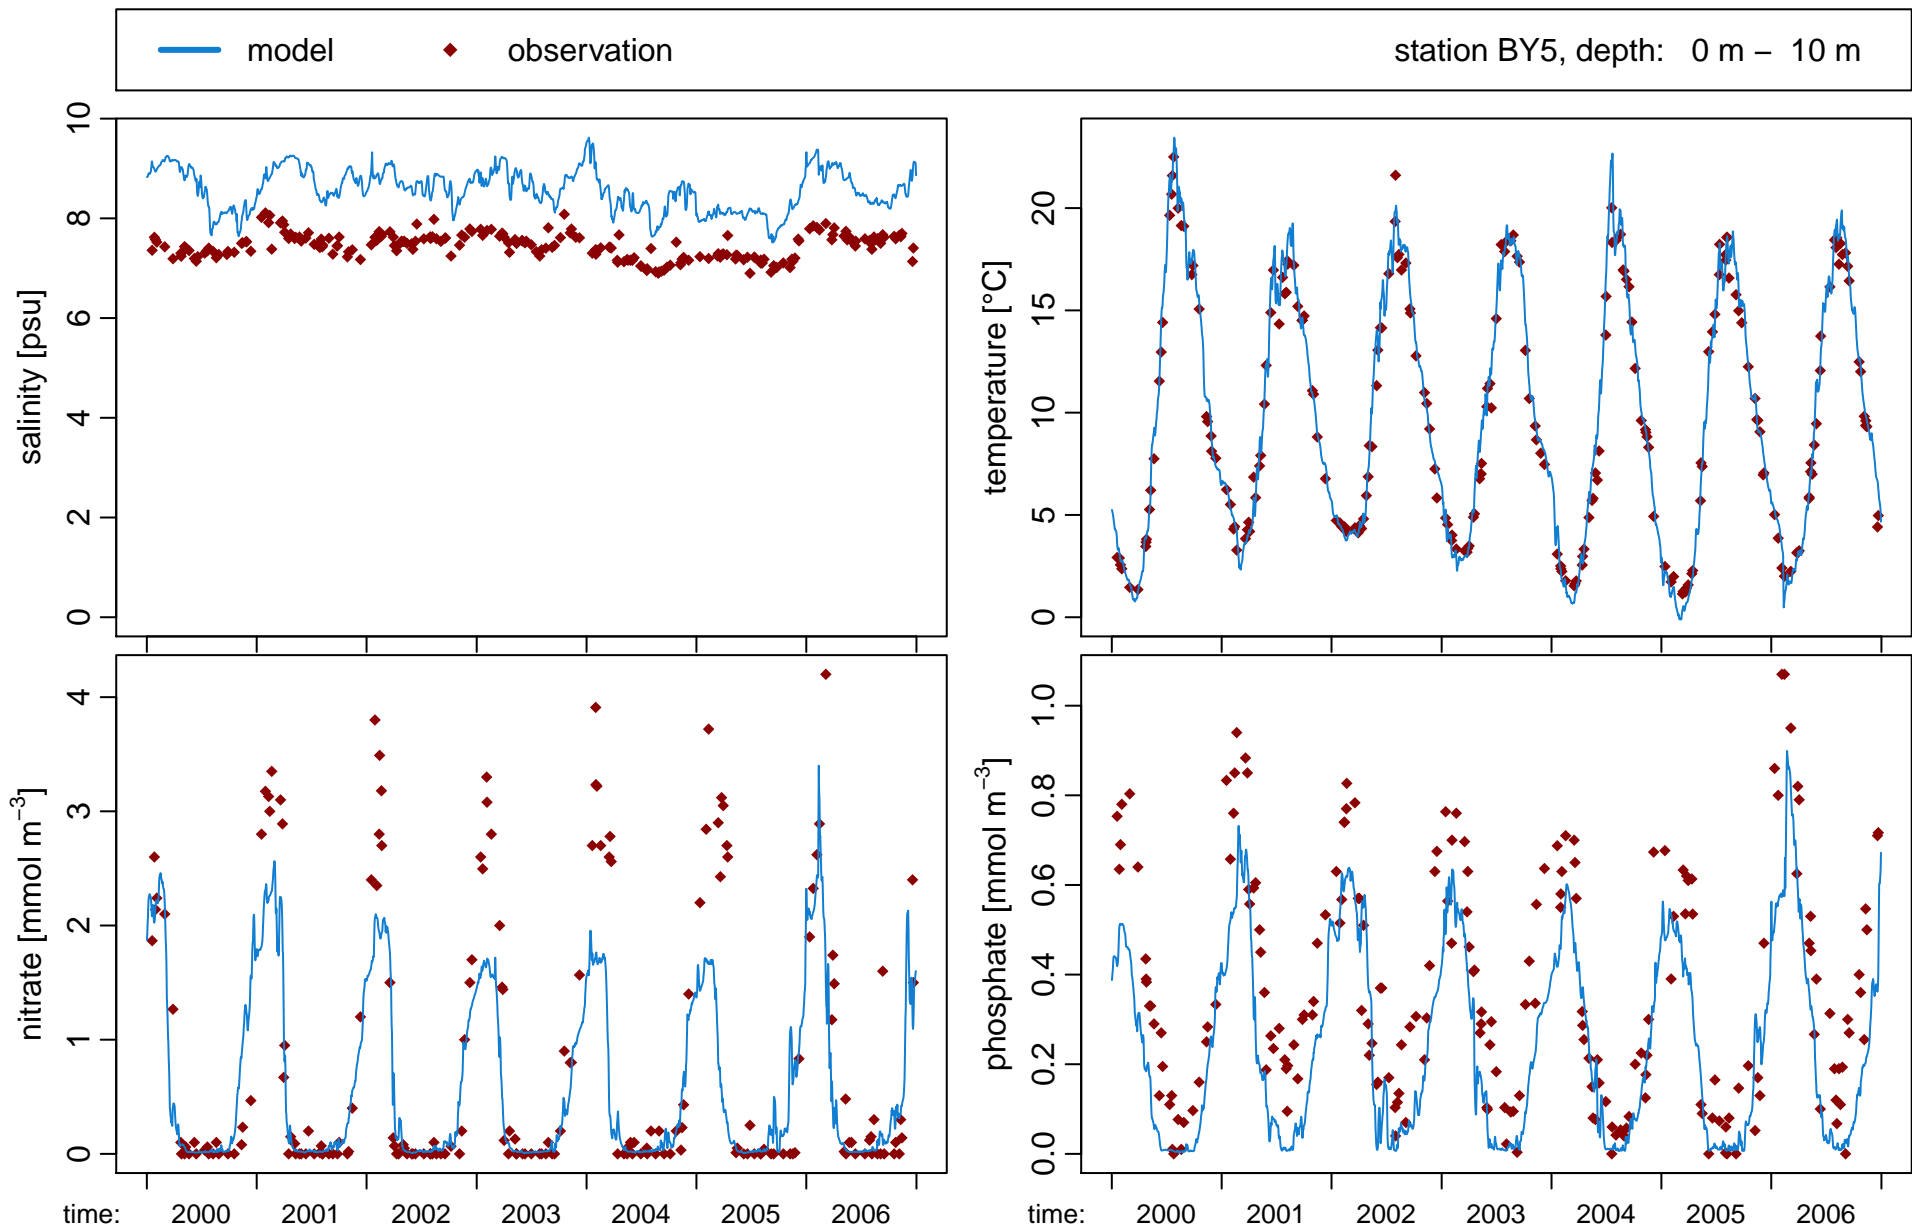

Supplement: Supplementary file 4 [file s04_timeseries_stations_validation_surface.pdf › 0_supplement/s04_timeseries_stations_validation_surface.pdf]
