# Supplementary material for: Quantifying the contribution of shipping NO x emissions to the marine nitrogen inventory – a case study for the western Baltic Sea
Source: Copernicus journal article supplement (doi:10.5194/os-16-115-2020), 2020-01-21

— model    ◆ observation

station DMU547, depth: 15 m – 23 m

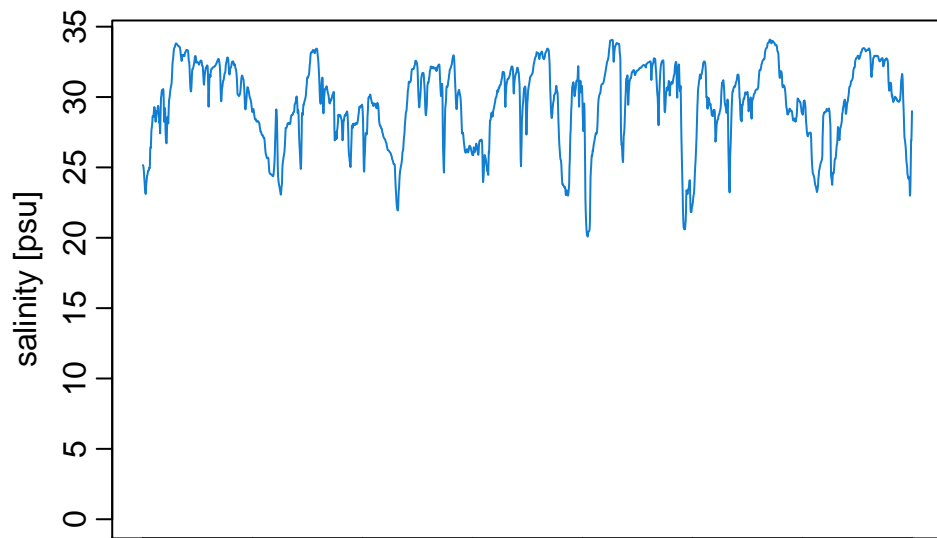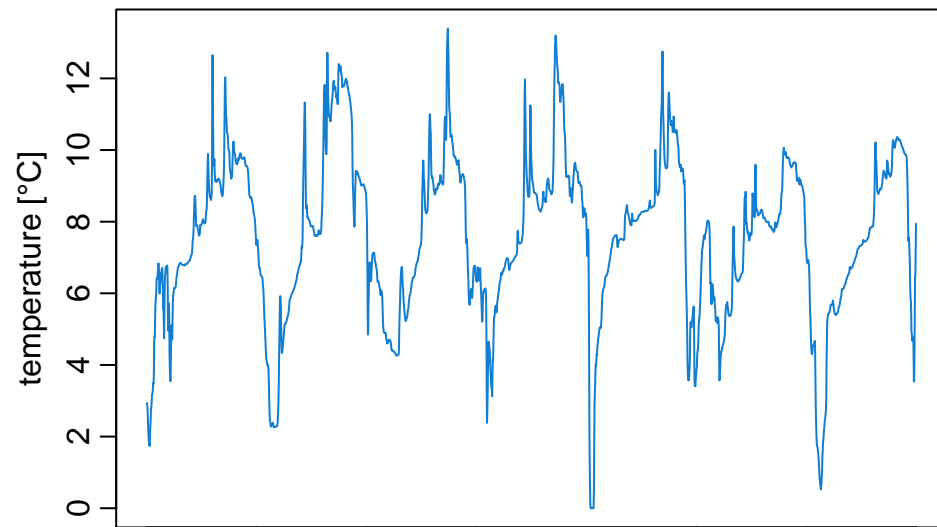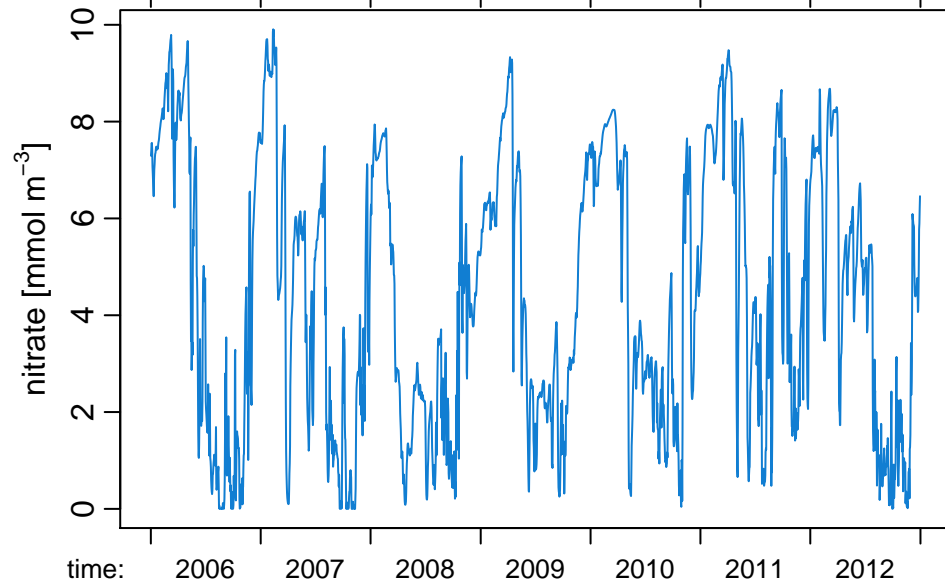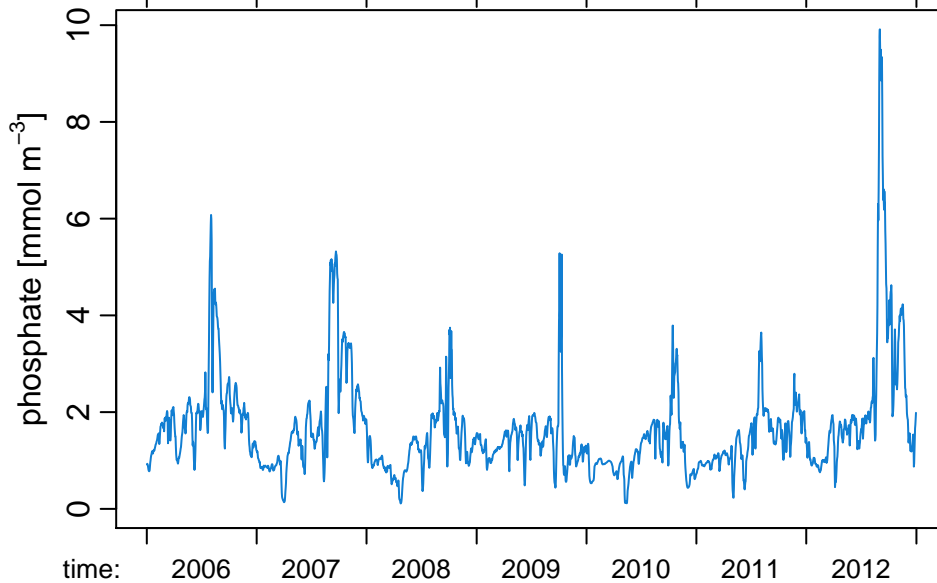

— model      ◆ observation

station OMBMPN1, depth: 24 m – 32 m

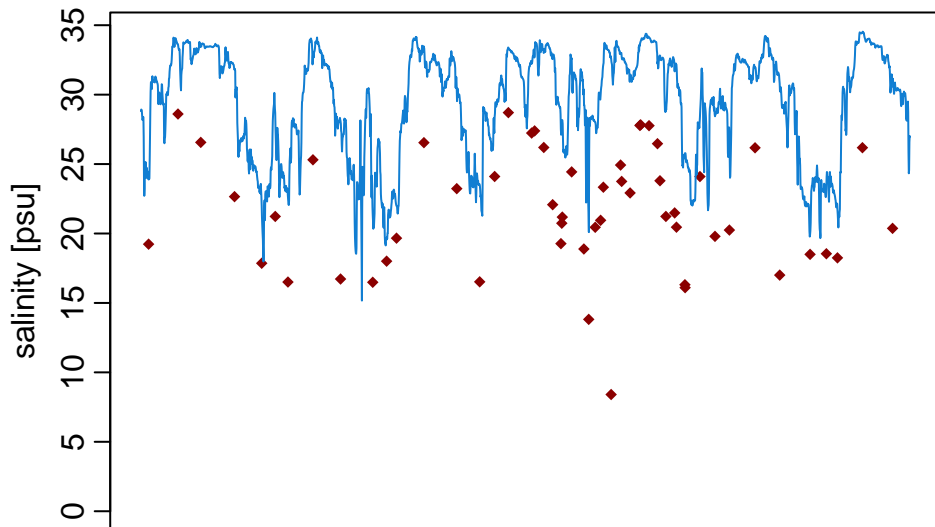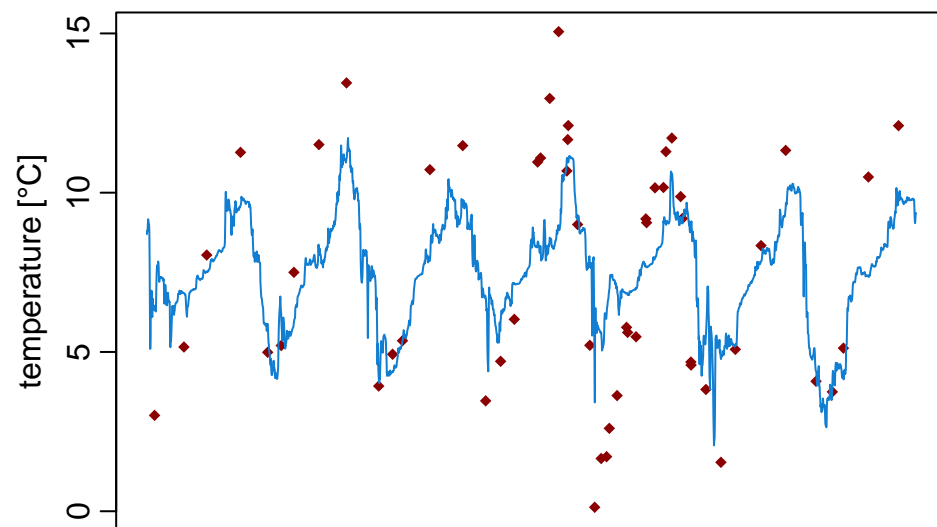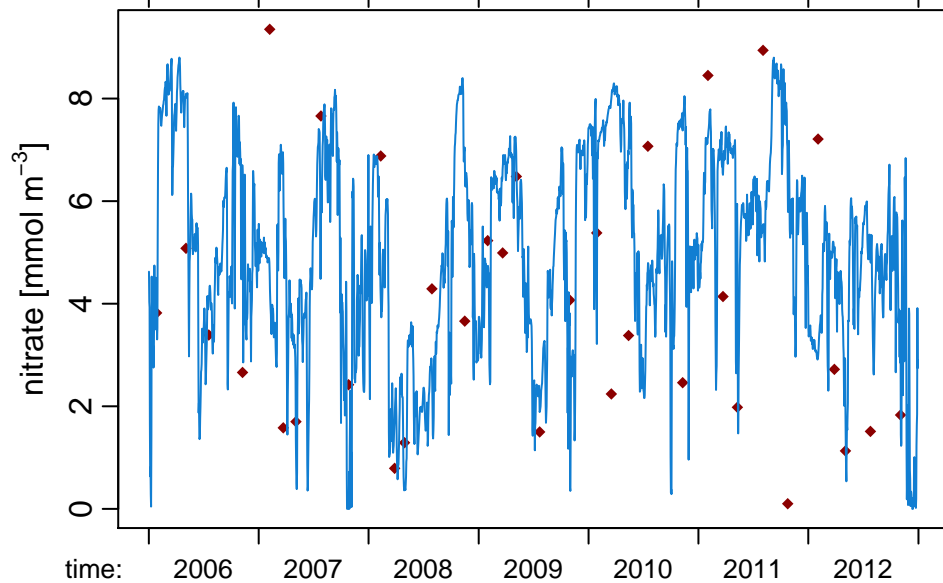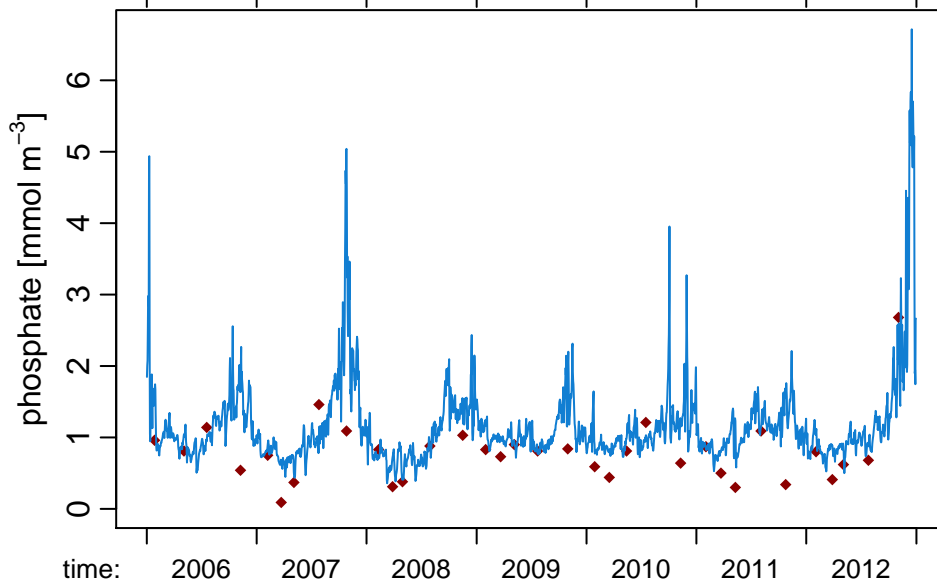

— model      ◆ observation

station OMBMPM2, depth: 20 m – 28 m

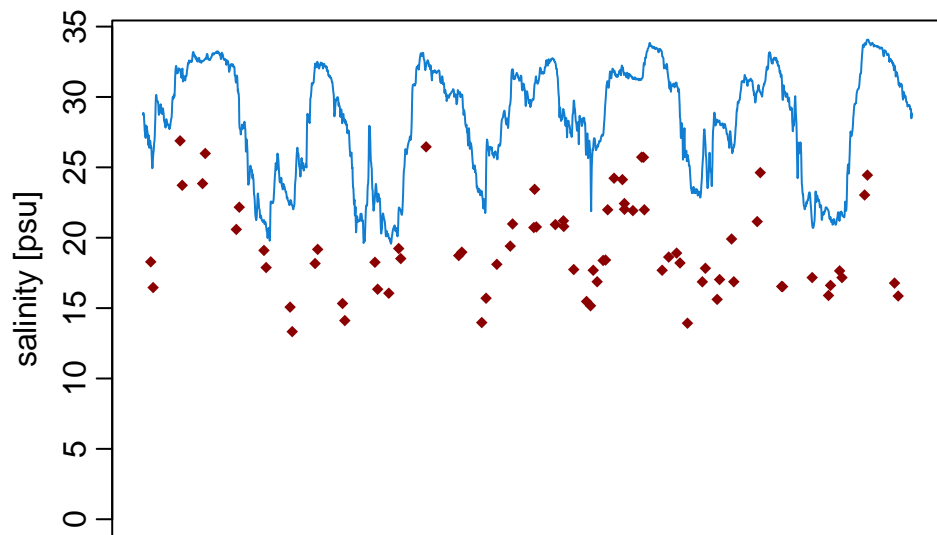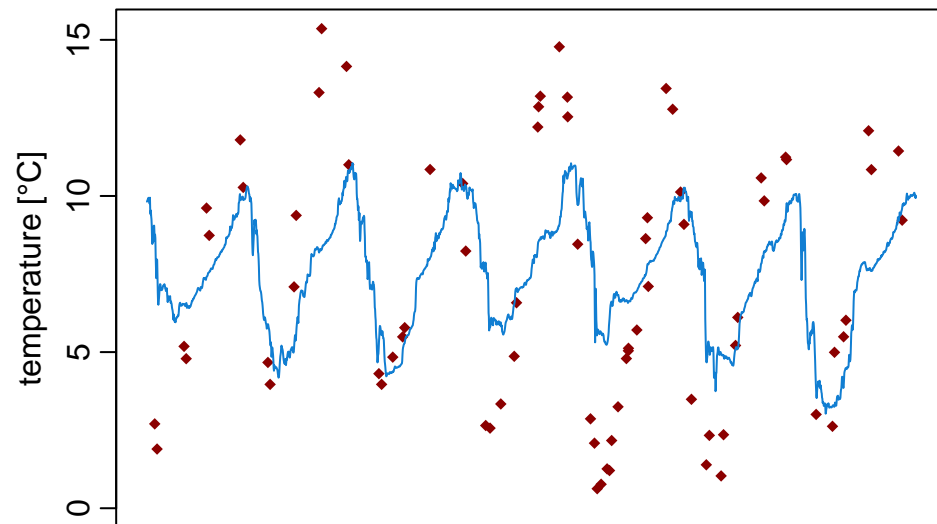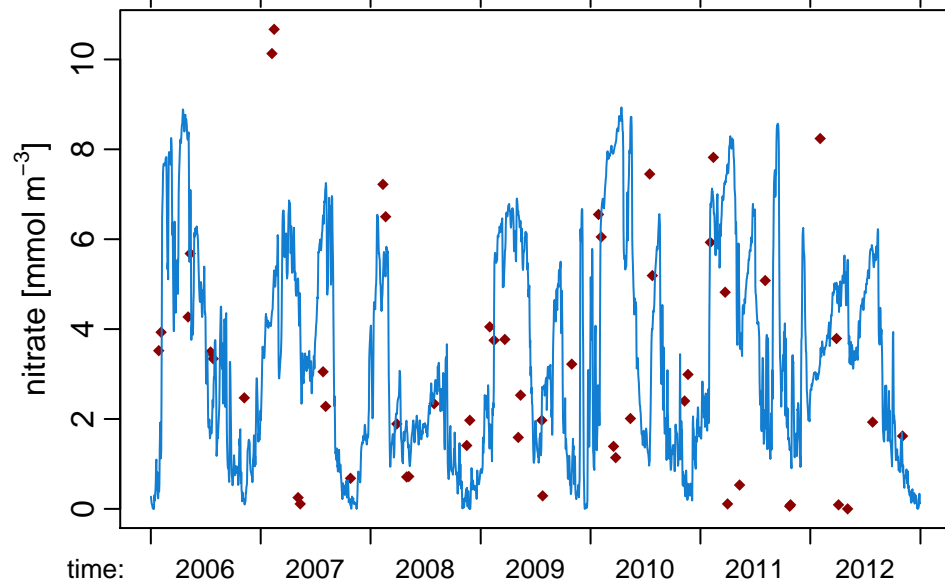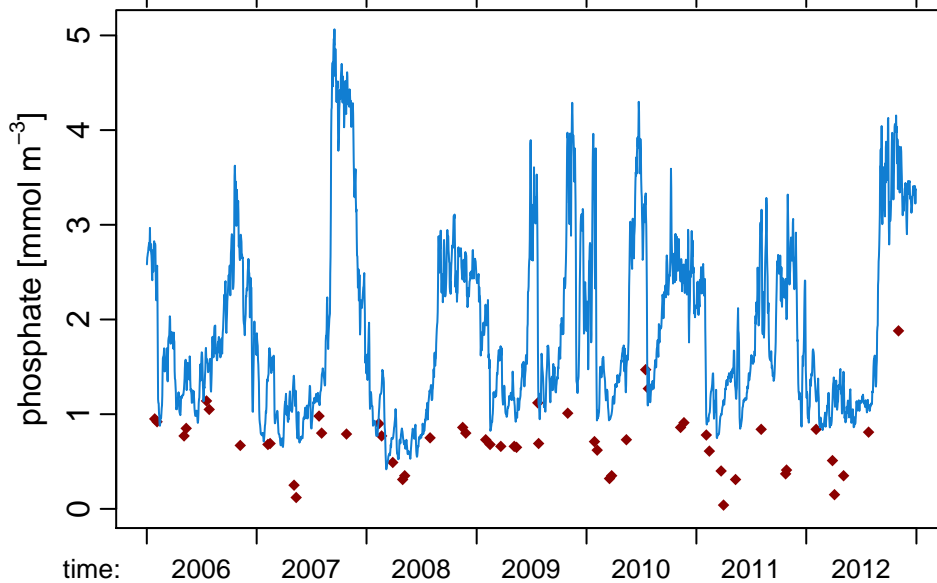

— model      ◆ observation

station OMBMPM, depth: 18 m – 31 m

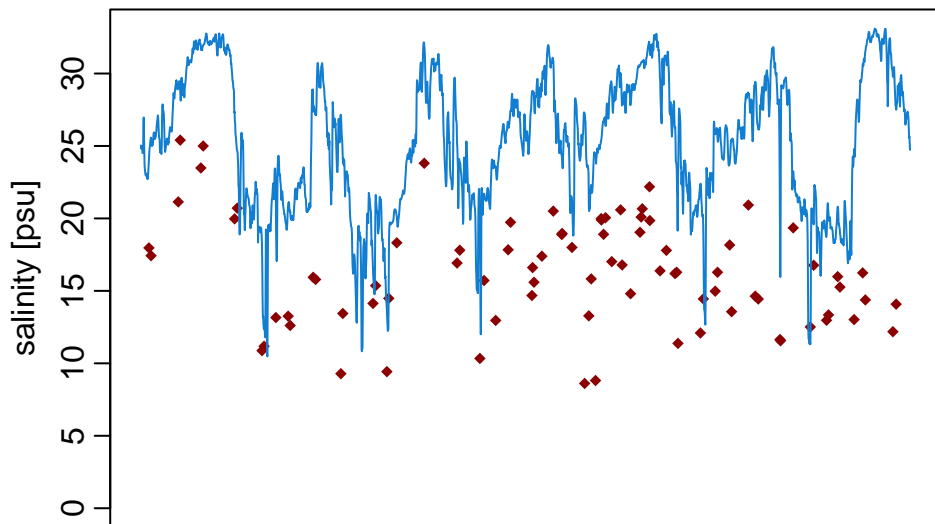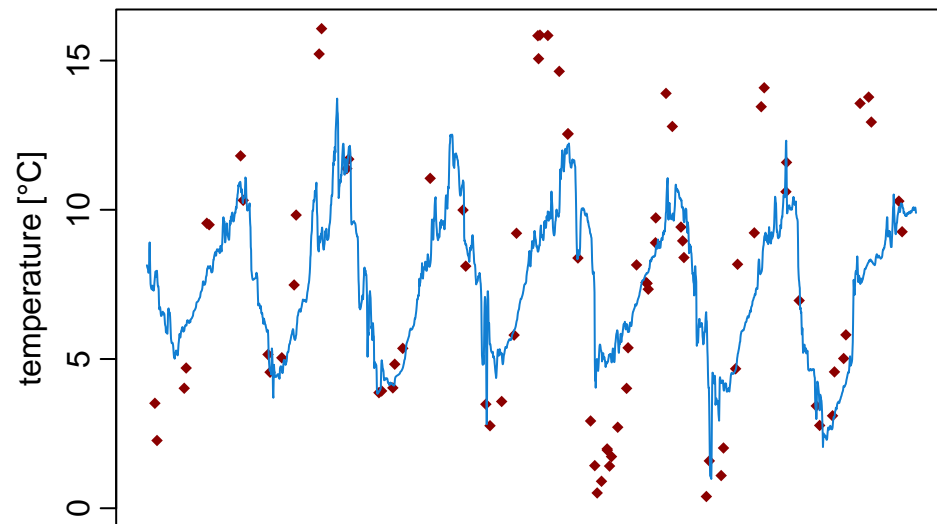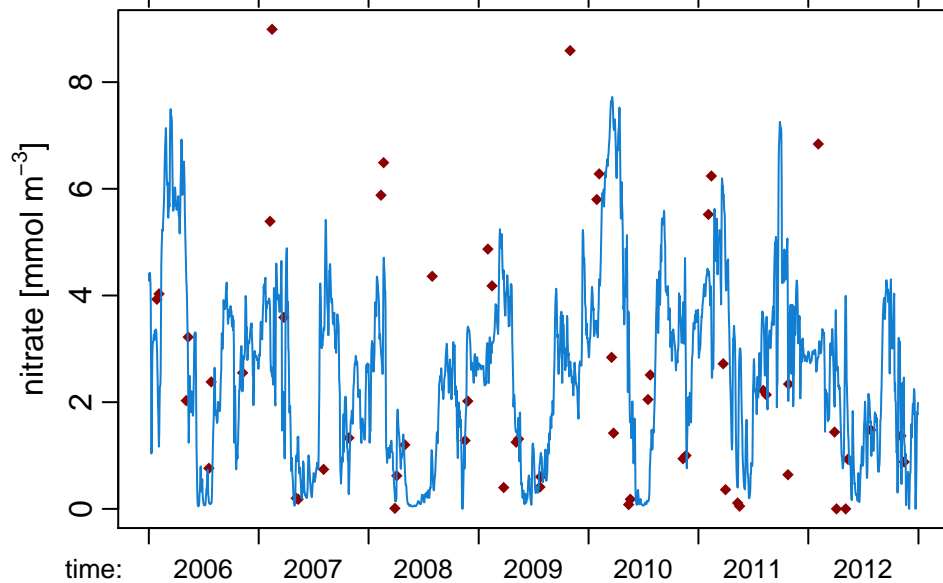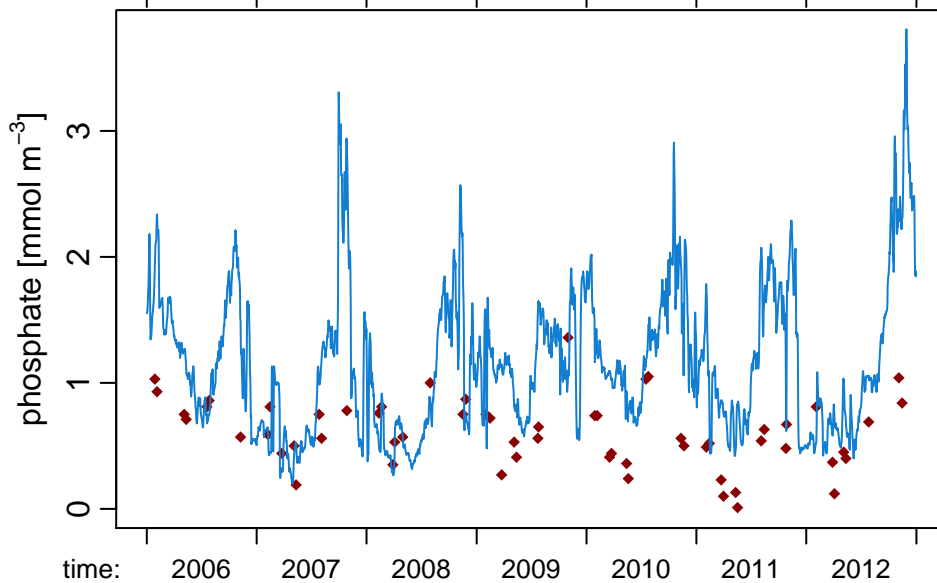

— model      ◆ observation

station OMBMPK8, depth: 18 m – 26 m

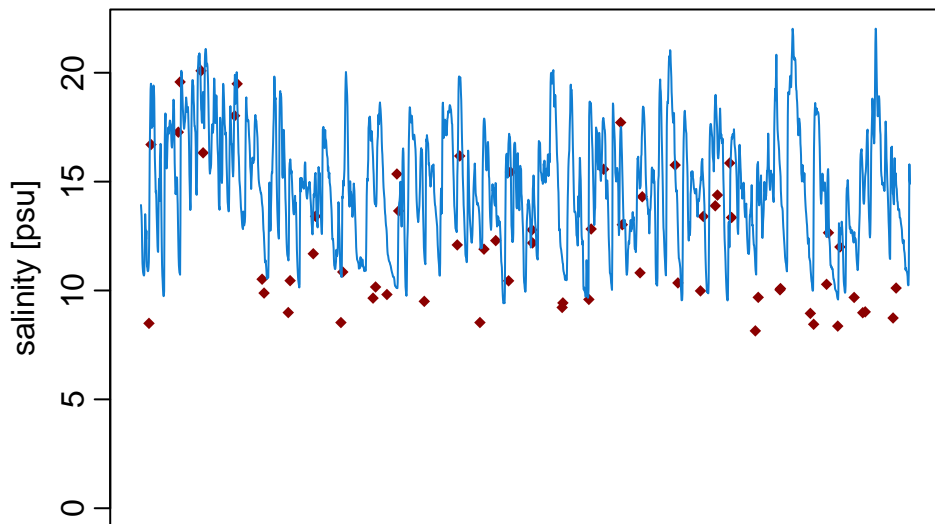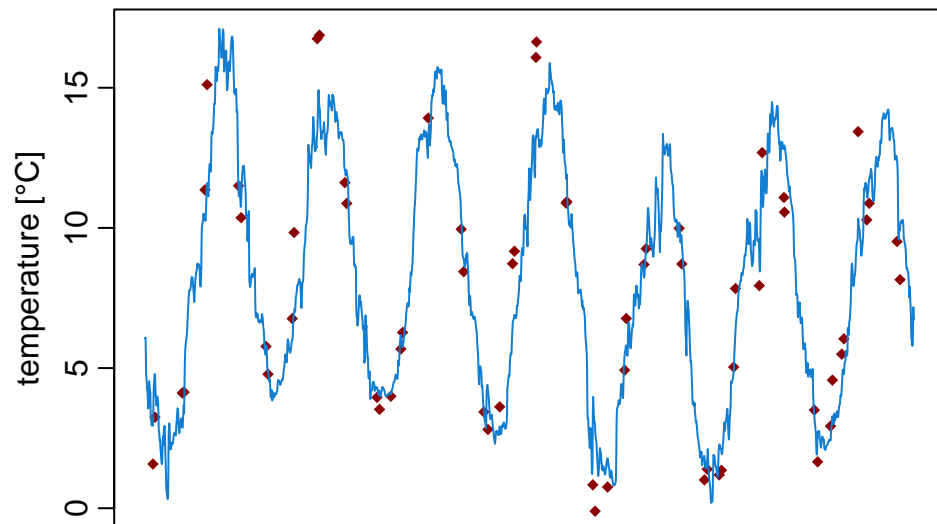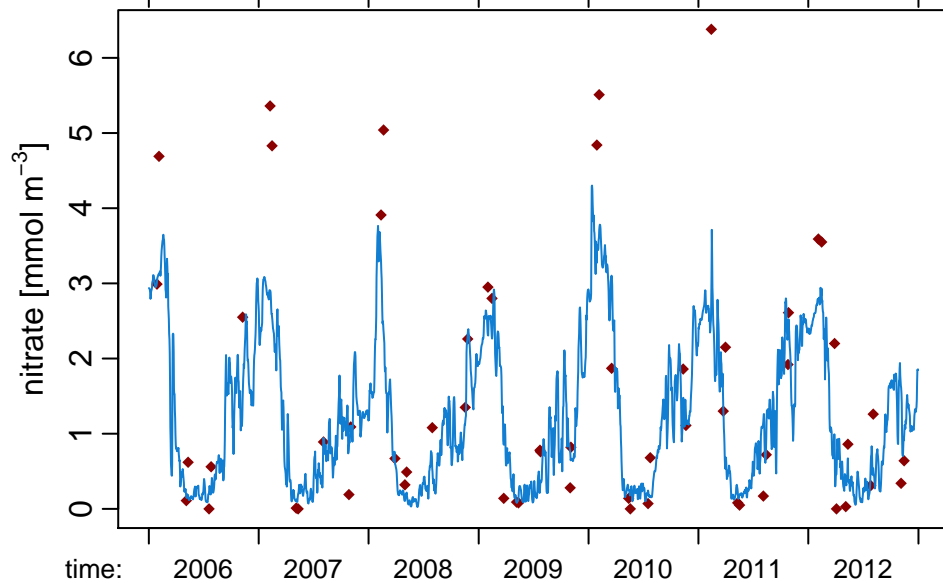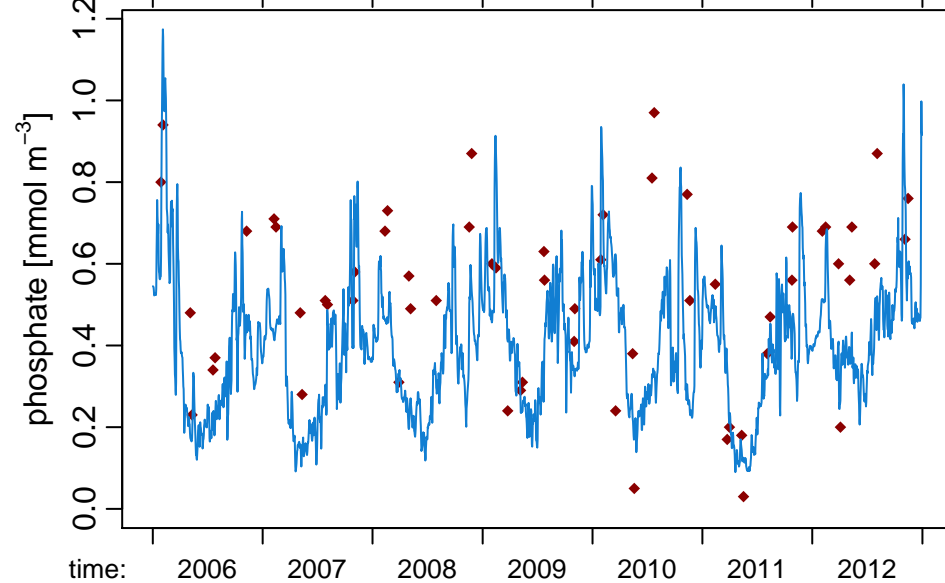

— model      ◆ observation

station BY2, depth: 42 m – 52 m

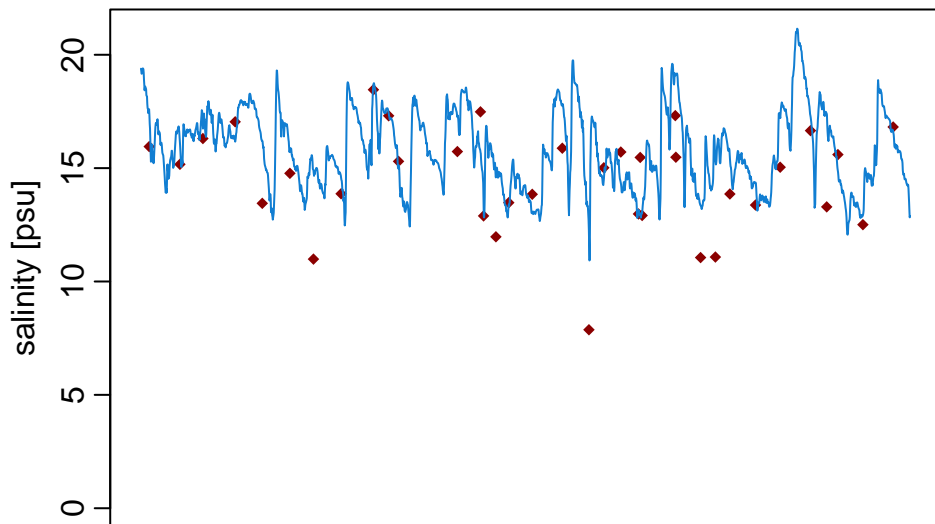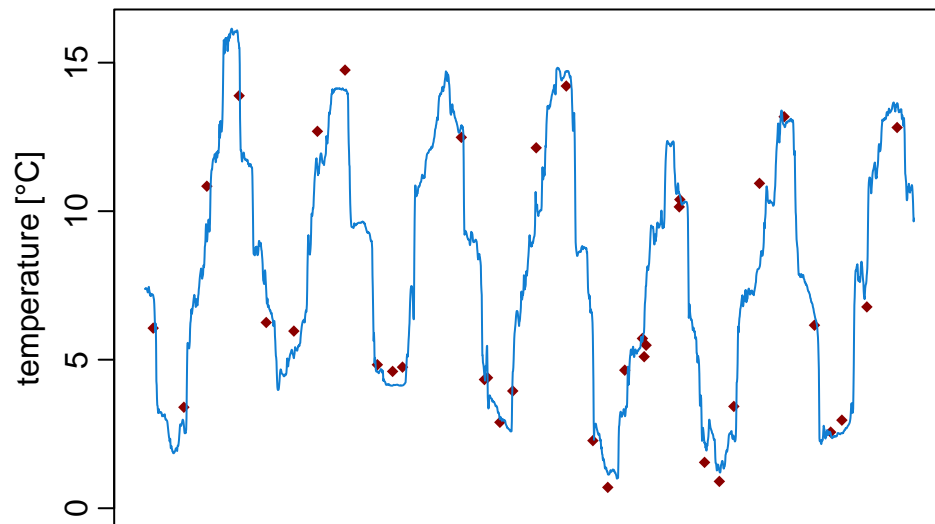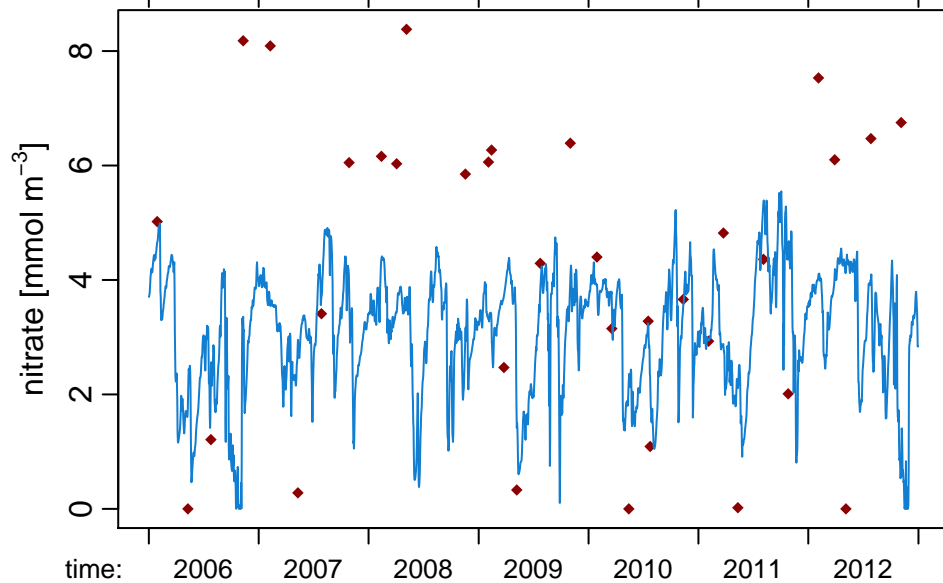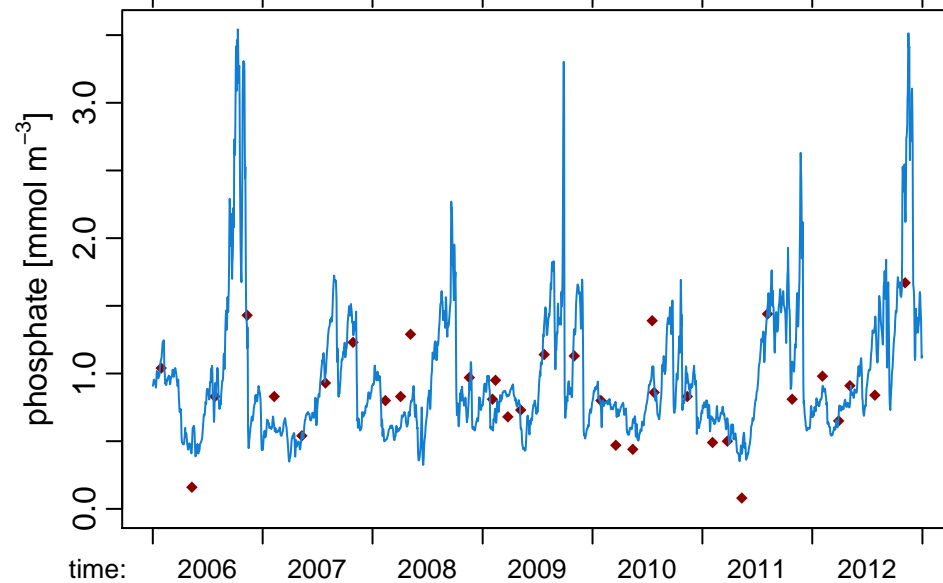

— model      ◆ observation

station BY5, depth: 81 m – 99 m

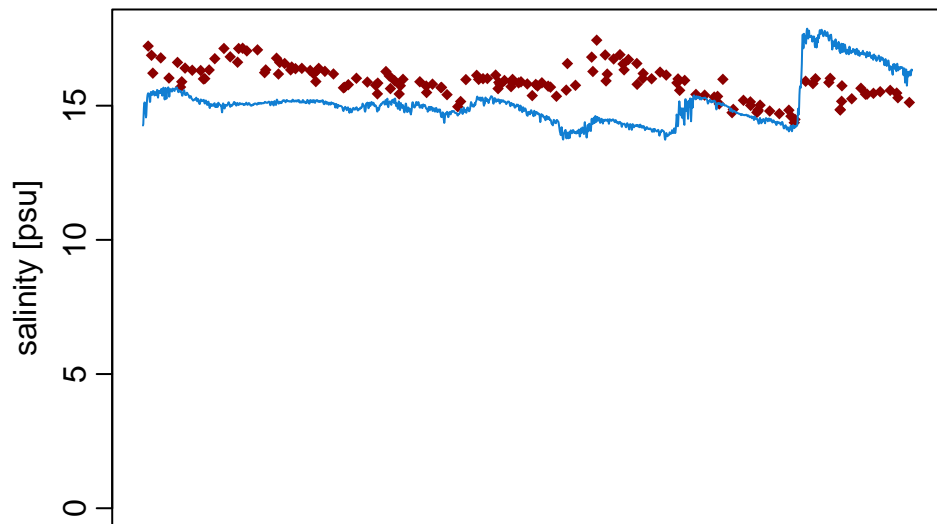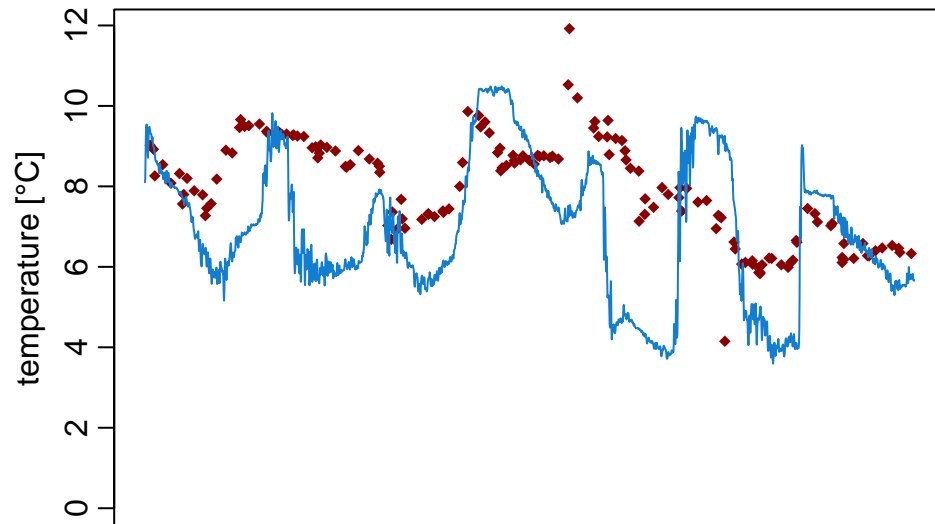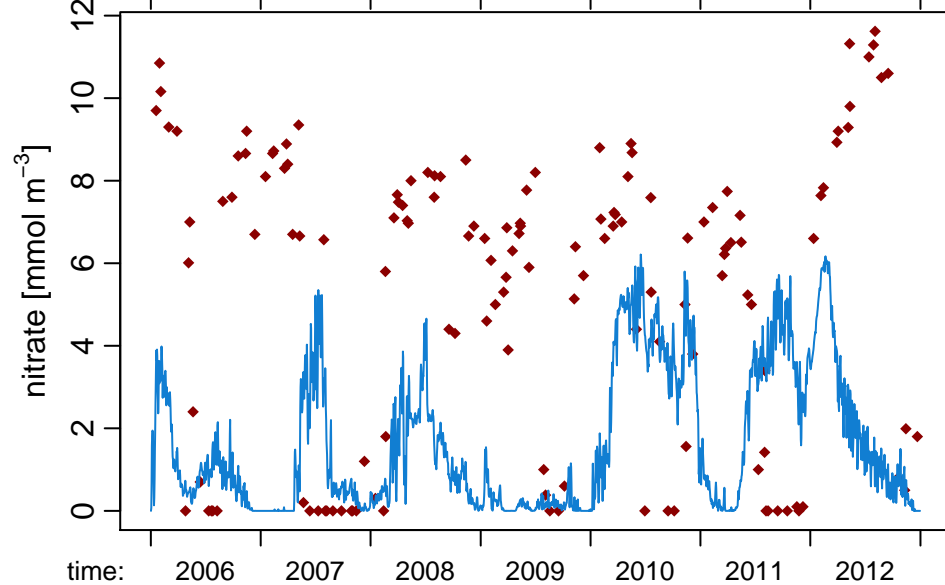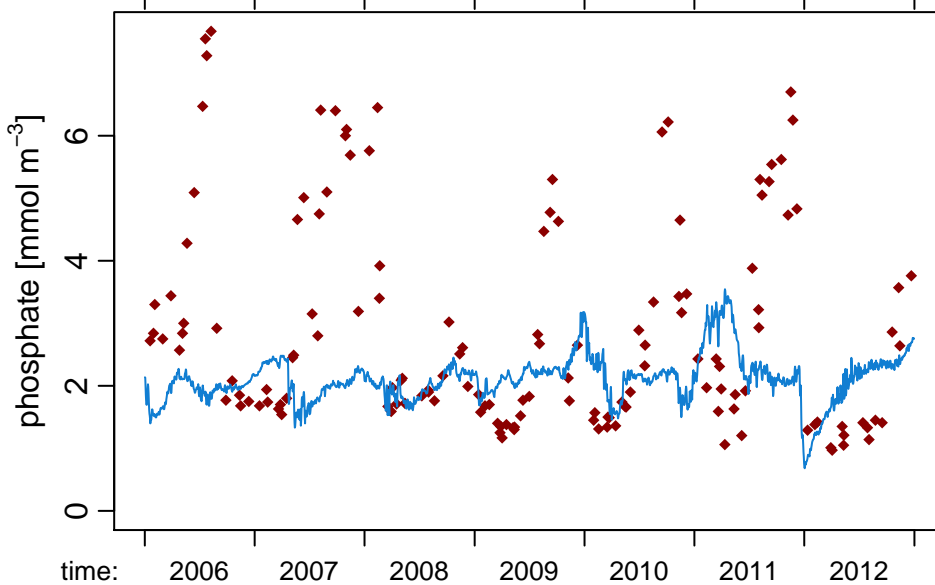

Supplement: Supplementary file 5 [file s05_timeseries_stations_validation_bottom.pdf › 0_supplement/s05_timeseries_stations_validation_bottom.pdf]
