# Supplementary material for: Quantifying the contribution of shipping NO x emissions to the marine nitrogen inventory – a case study for the western Baltic Sea
Source: Copernicus journal article supplement (doi:10.5194/os-16-115-2020), 2020-01-21
Supplement: Supplementary file 1 [file s01_ergom_doc.pdf › 0_supplement/s01_ergom_doc.pdf]

# **ERGOM (2.00a1 experimental POCN, POCP ) Documentation**

Thomas Neumann, Hagen Radtke, Martin Schmidt

June 4, 2019

# Contents

|          |                                                                |           |
|----------|----------------------------------------------------------------|-----------|
| <b>1</b> | <b>Introduction</b>                                            | <b>3</b>  |
| <b>2</b> | <b>Description of model state variables (tracers)</b>          | <b>4</b>  |
| <b>3</b> | <b>Description of model processes, ordered by process type</b> | <b>9</b>  |
| 3.1      | Process type BGC/benthic/bioresuspension . . . . .             | 9         |
| 3.2      | Process type BGC/benthic/mineralisation . . . . .              | 12        |
| 3.3      | Process type BGC/benthic/P_retention . . . . .                 | 18        |
| 3.4      | Process type BGC/pelagic/mineralisation . . . . .              | 20        |
| 3.5      | Process type BGC/pelagic/phytoplankton . . . . .               | 28        |
| 3.6      | Process type BGC/pelagic/reoxidation . . . . .                 | 41        |
| 3.7      | Process type BGC/pelagic/zooplankton . . . . .                 | 43        |
| 3.8      | Process type gas_exchange . . . . .                            | 47        |
| 3.9      | Process type physics/erosion . . . . .                         | 51        |
| 3.10     | Process type physics/parametrization_deep_burial . . . . .     | 54        |
| 3.11     | Process type physics/sedimentation . . . . .                   | 57        |
| 3.12     | Process type standard . . . . .                                | 60        |
| <b>4</b> | <b>Tracer equations</b>                                        | <b>61</b> |

# 1 Introduction

This is an automatically generated description of the ecosystem model ERGOM version 2.00a1 experimental POCN, POCP . Model formulation is provided by text files in compliance with the rules of the Code Generation Tool (CGT) by Hagen Radtke (see [www.ergom.net](http://www.ergom.net)).

The model consists of a set of state variables, the so called tracers. They are defined and described in Chapter 2.

The following Chapter 3 is the main part of this model description document, since it describes the processes which change the tracer concentrations over time. They are defined analog to chemical processes, two components describe their action:

- A process equation which describes the transformation from precursors (on the left-hand side) to products (on the right-hand side), and
- a turnover rate, describing how fast the process runs.

The rate at which a process changes a tracer can then easily be determined by multiplying the process turnover rate with the stoichiometric ratio in which it consumes or produces the tracer according to the reaction equation.

We structured the documentation into different process types to keep the documentation readable. So all processes belonging to one type (e.g. phytoplankton assimilation) are listed together with their constants and auxiliary variables they depend on. This means that some constants, such as stoichiometric ratios, will occur several times in this documentation, making it longer. We take this compromise for the sake of readability, keeping all information required to understand a specific process in its own section.

The classical way of describing an ecosystem model is by giving the tracer equations. We still do this in the last chapter for the sake of completeness, but rather suggest to stick to Chapter 3 to understand the model, and see Chapter 4 as a supplement only.

## 2 Description of model state variables (tracers)

| Tracers in the water column only |                                                                                                |
|----------------------------------|------------------------------------------------------------------------------------------------|
| t_n2                             | dissolved molecular nitrogen (mol/kg)                                                          |
| t_o2                             | dissolved oxygen (mol/kg)                                                                      |
| t_dic                            | dissolved inorganic carbon, treated as carbon dioxide (mol/kg)                                 |
| t_nh4                            | ammonium (mol/kg)                                                                              |
| t_no3                            | nitrate (mol/kg)                                                                               |
| t_po4                            | phosphate (mol/kg)                                                                             |
| t_spp                            | small-cell phytoplankton (mol/kg)                                                              |
| opacity =                        | 58.0 m <sup>2</sup> /mol                                                                       |
| t_zoo                            | zooplankton (mol/kg)                                                                           |
| t_h2s                            | hydrogen sulfide (mol/kg)                                                                      |
| t_sul                            | sulfur (mol/kg)                                                                                |
| t_alk                            | total alkalinity (mol/kg)                                                                      |
| t_doc                            | dissolved organic carbon (mol/kg)                                                              |
| t_dop                            | phosphorus in dissolved organic carbon in Redfield ratio (mol/kg)                              |
| total_atmos_tot_N                | total_atmos_tot_N (mol/kg)                                                                     |
| total_atmos_ship_N               | total_atmos_ship_N (mol/kg)                                                                    |
| t_n2_with_atmos_tot              | dissolved molecular nitrogen; containing nitrogen from (total) atmospheric deposition (mol/kg) |
| t_nh4_with_atmos_tot             | ammonium; containing nitrogen from (total) atmospheric deposition (mol/kg)                     |
| continued on next page...        |                                                                                                |

## Tracers in the water column only, continued from previous page

nitrate; containing nitrogen from (total) atmospheric  
t\_no3\_with\_atmos\_totdeposition (mol/kg)

small-cell phytoplankton; containing nitrogen from (total)  
t\_spp\_with\_atmos\_totatmospheric deposition (mol/kg)

zooplankton; containing nitrogen from (total) atmospheric  
t\_zoo\_with\_atmos\_totdeposition (mol/kg)

dissolved molecular nitrogen; containing nitrogen from  
t\_n2\_with\_atmos\_shipatmospheric deposition, which has been previously emitted  
by ships (mol/kg)

ammonium; containing nitrogen from atmospheric deposition,  
t\_nh4\_with\_atmos\_shiwhich has been previously emitted by ships (mol/kg)

nitrate; containing nitrogen from atmospheric deposition,  
t\_no3\_with\_atmos\_shiwhich has been previously emitted by ships (mol/kg)

small-cell phytoplankton; containing nitrogen from  
t\_spp\_with\_atmos\_shiatmospheric deposition, which has been previously emitted  
by ships (mol/kg)

zooplankton; containing nitrogen from atmospheric  
t\_zoo\_with\_atmos\_shideposition, which has been previously emitted by ships  
(mol/kg)

t\_ipw                      suspended iron phosphate (mol/kg)  
vertical speed =        -1.0 m/day

nitrogen in particulate organic carbon in Redfield ratio;  
t\_pocn\_with\_atmos\_tcontaining nitrogen from (total) atmospheric deposition  
(mol/kg)  
vertical speed =        -0.1 m/day

large-cell phytoplankton; containing nitrogen from (total)  
t\_lpp\_with\_atmos\_totatmospheric deposition (mol/kg)  
vertical speed =        -0.5 m/day

nitrogen in dissolved organic carbon in Redfield ratio;  
t\_don\_with\_atmos\_totcontaining nitrogen from (total) atmospheric deposition  
(mol/kg)

continued on next page...

| Tracers in the water column only, continued from previous page |                                                                                                                                                                       |
|----------------------------------------------------------------|-----------------------------------------------------------------------------------------------------------------------------------------------------------------------|
| vertical speed =                                               | -0.1 m/day                                                                                                                                                            |
| <b>t_cya_with_atmos_tot</b>                                    | <b>diazotroph cyanobacteria; containing nitrogen from (total) atmospheric deposition (mol/kg)</b>                                                                     |
| vertical speed =                                               | 1.0 m/day                                                                                                                                                             |
| <b>t_det_with_atmos_tot</b>                                    | <b>detritus; containing nitrogen from (total) atmospheric deposition (mol/kg)</b>                                                                                     |
| vertical speed =                                               | -4.5 m/day                                                                                                                                                            |
| <b>t_lpp</b>                                                   | <b>large-cell phytoplankton (mol/kg)</b>                                                                                                                              |
| vertical speed =                                               | -0.5 m/day                                                                                                                                                            |
| opacity =                                                      | 58.0 m <sup>2</sup> /mol                                                                                                                                              |
| <b>t_don</b>                                                   | <b>nitrogen in dissolved organic carbon in Redfield ratio (mol/kg)</b>                                                                                                |
| vertical speed =                                               | -0.1 m/day                                                                                                                                                            |
| opacity =                                                      | 12.6 m <sup>2</sup> /mol                                                                                                                                              |
| <b>t_cya</b>                                                   | <b>diazotroph cyanobacteria (mol/kg)</b>                                                                                                                              |
| vertical speed =                                               | 1.0 m/day                                                                                                                                                             |
| opacity =                                                      | 58.0 m <sup>2</sup> /mol                                                                                                                                              |
| <b>t_det</b>                                                   | <b>detritus (mol/kg)</b>                                                                                                                                              |
| vertical speed =                                               | -4.5 m/day                                                                                                                                                            |
| opacity =                                                      | 53.2 m <sup>2</sup> /mol                                                                                                                                              |
| <b>t_poc</b>                                                   | <b>particulate organic carbon (mol/kg)</b>                                                                                                                            |
| vertical speed =                                               | -0.2 m/day                                                                                                                                                            |
| <b>t_pocp</b>                                                  | <b>phosphorus in particulate organic carbon in Redfield ratio (mol/kg)</b>                                                                                            |
| vertical speed =                                               | -0.1 m/day                                                                                                                                                            |
| <b>t_pocn</b>                                                  | <b>nitrogen in particulate organic carbon in Redfield ratio (mol/kg)</b>                                                                                              |
| vertical speed =                                               | -0.1 m/day                                                                                                                                                            |
| <b>t_pocn_with_atmos_sh</b>                                    | <b>nitrogen in particulate organic carbon in Redfield ratio; containing nitrogen from atmospheric deposition, which has been previously emitted by ships (mol/kg)</b> |
| vertical speed =                                               | -0.1 m/day                                                                                                                                                            |
| <b>t_lpp_with_atmos_sh</b>                                     | <b>large-cell phytoplankton; containing nitrogen from atmospheric deposition, which has been previously emitted by ships (mol/kg)</b>                                 |
| continued on next page...                                      |                                                                                                                                                                       |

| Tracers in the water column only, continued from previous page |                                                                                                                                                              |
|----------------------------------------------------------------|--------------------------------------------------------------------------------------------------------------------------------------------------------------|
| vertical speed =                                               | -0.5 m/day                                                                                                                                                   |
| t_don_with_atmos_shi                                           | nitrogen in dissolved organic carbon in Redfield ratio; containing nitrogen from atmospheric deposition, which has been previously emitted by ships (mol/kg) |
| vertical speed =                                               | -0.1 m/day                                                                                                                                                   |
| t_cya_with_atmos_shi                                           | diazotroph cyanobacteria; containing nitrogen from atmospheric deposition, which has been previously emitted by ships (mol/kg)                               |
| vertical speed =                                               | 1.0 m/day                                                                                                                                                    |
| t_det_with_atmos_shi                                           | detritus; containing nitrogen from atmospheric deposition, which has been previously emitted by ships (mol/kg)                                               |
| vertical speed =                                               | -4.5 m/day                                                                                                                                                   |
| Tracers in water and pore water                                |                                                                                                                                                              |
| Tracers in fluff and sediment                                  |                                                                                                                                                              |
| t_sed                                                          | sediment detritus (mol/m <sup>2</sup> )                                                                                                                      |
| t_ips                                                          | iron phosphate in sediment (mol/m <sup>2</sup> )                                                                                                             |
| t_sed_poc                                                      | sediment particular carbon (mol/m <sup>2</sup> )                                                                                                             |
| t_sed_pocn                                                     | sediment particular organic N+C (mol/m <sup>2</sup> )                                                                                                        |
| t_sed_pocp                                                     | sediment particular organic P+C (mol/m <sup>2</sup> )                                                                                                        |
| total_atmos_tot_N_at                                           | total_atmos_tot_N_at_bottom (mol/m <sup>2</sup> )                                                                                                            |
| total_atmos_ship_N_a                                           | total_atmos_ship_N_at_bottom (mol/m <sup>2</sup> )                                                                                                           |
| t_sed_with_atmos_tot                                           | sediment detritus; containing nitrogen from (total) atmospheric deposition (mol/m <sup>2</sup> )                                                             |
| t_sed_pocn_with_atmc                                           | sediment particular organic N+C; containing nitrogen from (total) atmospheric deposition (mol/m <sup>2</sup> )                                               |
| t_sed_with_atmos_shi                                           | sediment detritus; containing nitrogen from atmospheric deposition, which has been previously emitted by ships (mol/m <sup>2</sup> )                         |
| t_sed_pocn_with_atmc                                           | sediment particular organic N+C; containing nitrogen from atmospheric deposition, which has been previously emitted by ships (mol/m <sup>2</sup> )           |
| continued on next page...                                      |                                                                                                                                                              |

Tracers in fluff and sediment, continued from previous page



## 3 Description of model processes, ordered by process type

### 3.1 Process type BGC/benthic/bioresuspension

| Processes                                                                                                                                                                                                                                                                                                                                |
|------------------------------------------------------------------------------------------------------------------------------------------------------------------------------------------------------------------------------------------------------------------------------------------------------------------------------------------|
| <b>bio resuspension of sedimentary detritus (sediment only) [mol/m<sup>2</sup>/day]</b><br><code>t_sed -&gt; t_det</code><br><code>p_sed_biores_det = (r_biores*exp(-0.02*cgt_bottomdepth)*sed_active)*<br/> lim_t_o2_6*lim_t_sed_20</code>                                                                                              |
| <b>bio resuspension of iron PO<sub>4</sub> (sediment only) [mol/m<sup>2</sup>/day]</b><br><code>t_ips -&gt; t_ipw</code><br><code>p_ips_biores_ipw = (r_biores*exp(-0.02*cgt_bottomdepth)*t_ips)*lim_t_o2_6*<br/> lim_t_ips_22</code>                                                                                                    |
| <b>bio resuspension of sedimentary poc (sediment only) [mol/m<sup>2</sup>/day]</b><br><code>t_sed_poc -&gt; t_poc</code><br><code>p_sed_biores_poc = (r_biores*exp(-0.02*cgt_bottomdepth)*poc_active)*<br/> lim_t_o2_6*lim_t_sed_poc_21</code>                                                                                           |
| <b>bio resuspension of sedimentary pocn (sediment only) [mol/m<sup>2</sup>/day]</b><br><code>t_sed_pocn -&gt; t_pocn</code><br><code>p_sed_biores_pocn = (r_biores*exp(-0.02*cgt_bottomdepth)*pocn_active)*<br/> lim_t_o2_6*lim_t_sed_pocn_26</code>                                                                                     |
| <b>bio resuspension of sedimentary pocp (sediment only) [mol/m<sup>2</sup>/day]</b><br><code>t_sed_pocp -&gt; t_pocp</code><br><code>p_sed_biores_pocp = (r_biores*exp(-0.02*cgt_bottomdepth)*pocp_active)*<br/> lim_t_o2_6*lim_t_sed_pocp_27</code>                                                                                     |
| <b>bio resuspension of sedimentary detritus; sub-process for atmos_tot nitrogen (sediment only) [mol/m<sup>2</sup>/day]</b><br><code>-&gt; t_det_with_atmos_tot_N</code><br><code>p_sed_biores_det * ((1.0)*(1)*<br/> p_sed_biores_det_atmmax(0.0,min(1.0,t_sed_with_atmos_tot_N/max(0.0000000001,t_sed)<br/> = ))) / ((1.0)*(1))</code> |
| <b>bio resuspension of sedimentary pocn; sub-process for atmos_tot nitrogen (sediment only) [mol/m<sup>2</sup>/day]</b>                                                                                                                                                                                                                  |
| continued on next page...                                                                                                                                                                                                                                                                                                                |

### Processes, continued from previous page

```
-> t_pocn_with_atmos_tot_N
      p_sed_biores_pocn * ((1.0)*(1)*
p_sed_biores_pocn_atmax(0.0,min(1.0,t_sed_pocn_with_atmos_tot_N/max(0.00000000001,t_sed_pocn)
=      ))) / ((1.0)*(1))
```

**bio resuspension of sedimentary detritus; sub-process for atmos\_ship nitrogen (sediment only) [mol/m<sup>2</sup>/day]**

```
-> t_det_with_atmos_ship_N
      p_sed_biores_det * ((1.0)*(1)*
p_sed_biores_det_atmax(0.0,min(1.0,t_sed_with_atmos_ship_N/max(0.00000000001,t_sed)
=      ))) / ((1.0)*(1))
```

**bio resuspension of sedimentary pocn; sub-process for atmos\_ship nitrogen (sediment only) [mol/m<sup>2</sup>/day]**

```
-> t_pocn_with_atmos_ship_N
      p_sed_biores_pocn * ((1.0)*(1)*
p_sed_biores_pocn_atmax(0.0,min(1.0,t_sed_pocn_with_atmos_ship_N/max(0.00000000001,t_sed_pocn)
=      ))) / ((1.0)*(1))
```

### Auxiliary variables

**total carbon in sediment layer [mol/m<sup>2</sup>]**

```
sed_tot =      t_sed*rfr_c + t_sed_poc + t_sed_pocn*rfr_c + t_sed_pocp*
              rfr_cp
```

**total carbon in active sediment layer [mol/m<sup>2</sup>]**

```
sed_tot_active =      max(0.0,min(sed_tot,sed_max*rfr_c))
```

**detritus in active sediment layer [mol/m<sup>2</sup>]**

```
sed_active =      sed_tot_active * t_sed/sed_tot
```

**poc in active sediment layer [mol/m<sup>2</sup>]**

```
poc_active =      sed_tot_active * t_sed_poc/sed_tot
```

**pocn in active sediment layer [mol/m<sup>2</sup>]**

```
pocn_active =      sed_tot_active * t_sed_pocn/sed_tot
```

**pocp in active sediment layer [mol/m<sup>2</sup>]**

```
pocp_active =      sed_tot_active * t_sed_pocp/sed_tot
```

### Constants

**oxygen half-saturation constant for recycling of sediment detritus using oxygen [mol/kg]**

```
o2_min_sed_resp =      0.000064952
```

**bio-resuspension rate [1/day]**

```
r_biores =      0.015
```

continued on next page...

### Constants, continued from previous page

#### redfield ratio C/N

rfr\_c = 6.625

#### redfield ratio C/P

rfr\_cp = 106.0

#### maximum sediment detritus concentration that feels erosion [mol/m\*\*2]

sed\_max = 1.0

### Process limitation factors

lim\_t\_o2\_6 =  $t_{o2} * t_{o2} / (t_{o2} * t_{o2} + o2_{min\_sed\_resp} * o2_{min\_sed\_resp})$

lim\_t\_sed\_20 =  $\theta(t_{sed} - 0.0)$

lim\_t\_ips\_22 =  $\theta(t_{ips} - 0.0)$

lim\_t\_sed\_poc\_21 =  $\theta(t_{sed\_poc} - 0.0)$

lim\_t\_sed\_pocn\_26 =  $\theta(t_{sed\_pocn} - 0.0)$

lim\_t\_sed\_pocp\_27 =  $\theta(t_{sed\_pocp} - 0.0)$

### 3.2 Process type BGC/benthic/mineralisation

| Processes                                                                                                                                                                                                                                                                                                                                                                                                                                       |
|-------------------------------------------------------------------------------------------------------------------------------------------------------------------------------------------------------------------------------------------------------------------------------------------------------------------------------------------------------------------------------------------------------------------------------------------------|
| <p>recycling of sedimentary detritus to ammonium using oxygen (respiration)<br/>(sediment only) [mol/m<sup>2</sup>/day]</p> $0.8125 \cdot h3oplus + 6.625 \cdot t_{o2} + t_{sed} \rightarrow 7.4375 \cdot h2o + rfr_c \cdot t_{dic} + rfr_p \cdot t_{po4} + t_{nh4}$ $p_{sed\_resp\_nh4} = (lr_{sed\_rec} \cdot sed\_active) \cdot lim_{t_{o2\_2}} \cdot lim_{t_{sed\_20}}$                                                                     |
| <p>coupled nitrification and denitrification after mineralization of detritus in oxic sediments (sediment only) [mol/m<sup>2</sup>/day]</p> $0.75 \cdot t_{o2} + t_{nh4} \rightarrow 0.5 \cdot t_{n2} + h3oplus + 0.5 \cdot h2o$ $p_{nh4\_nitdenit\_n2} = (frac_{denit\_sed} \cdot p_{sed\_resp\_nh4} \cdot theta(t_{o2} - 5.0e-6)) \cdot lim_{t_{o2\_2}} \cdot lim_{t_{nh4\_11}}$                                                              |
| <p>recycling of sedimentary detritus to ammonium using nitrate (denitrification)<br/>(sediment only) [mol/m<sup>2</sup>/day]</p> $6.1125 \cdot h3oplus + t_{sed} \rightarrow 15.3875 \cdot h2o + t_{nh4} + rfr_p \cdot t_{po4} + rfr_c \cdot t_{dic}$ $(lr_{sed\_rec} \cdot sed\_active) \cdot (1.0 - lim_{t_{o2\_2}}) \cdot lim_{t_{no3\_3}} \cdot p_{sed\_denit\_nh4\_noN2} \cdot lim_{t_{sed\_20}}$ $=$                                      |
| <p>recycling of sedimentary detritus to ammonium using nitrate (denitrification)<br/>(sediment only) [mol/m<sup>2</sup>/day]</p> $5.3 \cdot t_{no3} \rightarrow 2.65 \cdot t_{n2}$ $(lr_{sed\_rec} \cdot sed\_active) \cdot (1.0 - lim_{t_{o2\_2}}) \cdot lim_{t_{no3\_3}}$ $p_{sed\_denit\_nh4\_wiN2}$ $=$                                                                                                                                     |
| <p>recycling of sedimentary detritus to ammonium using sulfate (sulfate reduction)<br/>(sediment only) [mol/m<sup>2</sup>/day]</p> $7.4375 \cdot h3oplus + 3.3125 \cdot so4 + t_{sed} \rightarrow 14.0625 \cdot h2o + 3.3125 \cdot t_{h2s} + rfr_c \cdot t_{dic} + rfr_p \cdot t_{po4} + t_{nh4}$ $p_{sed\_sulf\_nh4} = (lr_{sed\_rec} \cdot sed\_active) \cdot (1.0 - lim_{t_{o2\_2}}) \cdot (1.0 - lim_{t_{no3\_3}}) \cdot lim_{t_{sed\_20}}$ |
| <p>recycling of sedimentary poc to dic using oxygen (respiration) (sediment only)<br/>[mol/m<sup>2</sup>/day]</p> $t_{sed\_poc} + t_{o2} \rightarrow t_{dic} + h2o$ $p_{sed\_poc\_resp} = (lr_{sed\_rec} \cdot poc\_active) \cdot lim_{t_{sed\_poc\_21}} \cdot lim_{t_{o2\_2}}$                                                                                                                                                                 |
| <p>recycling of sedimentary poc to dic using nitrate (denitrification) (sediment only)<br/>[mol/m<sup>2</sup>/day]</p> $t_{sed\_poc} + 0.8 \cdot h3oplus + 0.8 \cdot t_{no3} \rightarrow t_{dic} + 0.4 \cdot t_{n2} + 2.2 \cdot h2o$ $p_{sed\_poc\_denit} = (lr_{sed\_rec} \cdot poc\_active) \cdot (1.0 - lim_{t_{o2\_2}}) \cdot lim_{t_{no3\_3}} \cdot lim_{t_{sed\_poc\_21}}$                                                                |
| continued on next page...                                                                                                                                                                                                                                                                                                                                                                                                                       |

## Processes, continued from previous page

recycling of sedimentary poc to dic using sulfate (sulfate reduction) (sediment only) [mol/m<sup>2</sup>/day]

$h3oplus + 0.5*so4 + t_{sed\_poc} \rightarrow 2.0*h2o + 0.5*t_{h2s} + t_{dic}$

$p_{sed\_poc\_sulf} = (lr_{sed\_rec}*poc\_active)*(1.0-lim\_t_{o2\_2})*(1.0-lim\_t_{no3\_3})*lim\_t_{sed\_poc\_21}$

recycling of sedimentary pocn to dic and NH4 using oxygen (respiration) (sediment only) [mol/m<sup>2</sup>/day]

$0.5*h3oplus + t_{sed\_pocn} + 6.625*t_{o2} \rightarrow 0.5*ohminus + t_{nh4} + 6.625*t_{dic} + 6.625*h2o$

$p_{sed\_pocn\_resp} = (lr_{sed\_rec}*pocn\_active)*lim\_t_{sed\_pocn\_26}*lim\_t_{o2\_2}$

recycling of sedimentary pocp to dic and PO4 using oxygen (respiration) (sediment only) [mol/m<sup>2</sup>/day]

$106*t_{o2} + t_{sed\_pocp} + 3*h2o \rightarrow 3*h3oplus + 106*t_{dic} + t_{po4} + 106*h2o$

$p_{sed\_pocp\_resp} = (lr_{sed\_rec}*pocp\_active)*lim\_t_{o2\_2}*lim\_t_{sed\_pocp\_27}$

recycling of sedimentary pocn to dic and NH4 using nitrate (denitrification) (sediment only) [mol/m<sup>2</sup>/day]

$5.8*h2o + t_{sed\_pocn} \rightarrow 0.5*ohminus + 14.575*h2o + t_{nh4} + 6.625*t_{dic}$

$(lr_{sed\_rec}*pocn\_active)*(1.0-lim\_t_{o2\_2})*lim\_t_{no3\_3}$   
 $p_{sed\_pocn\_denit\_no}lim\_t_{sed\_pocn\_26}$

=

recycling of sedimentary pocn to dic and NH4 using nitrate (denitrification) (sediment only) [mol/m<sup>2</sup>/day]

$5.3*t_{no3} \rightarrow 2.65*t_{n2}$

$(lr_{sed\_rec}*pocn\_active)*(1.0-lim\_t_{o2\_2})*lim\_t_{no3\_3}$   
 $p_{sed\_pocn\_denit\_wiN}$

=

recycling of sedimentary pocp to dic and PO4 using nitrate (denitrification) (sediment only) [mol/m<sup>2</sup>/day]

$t_{sed\_pocp} + 3*ohminus + 84.8*h3oplus + 84.8*t_{no3} \rightarrow 106*t_{dic} + t_{po4} + 42.4*t_{n2} + 236.2*h2o$

$p_{sed\_pocp\_denit} = (lr_{sed\_rec}*pocp\_active)*(1.0-lim\_t_{o2\_2})*lim\_t_{no3\_3}*lim\_t_{sed\_pocp\_27}$

recycling of sedimentary pocn to dic and NH4 using sulfate (sulfate reduction) (sediment only) [mol/m<sup>2</sup>/day]

$t_{pocn} + 3.3125*S04 + 7.125*h3oplus \rightarrow 6.625*t_{dic} + t_{nh4} + 3.3125*t_{h2s} + 13.25*H2O + 0.5*ohminus$

$p_{sed\_pocn\_sulf} = (lr_{sed\_rec}*pocn\_active)*(1.0-lim\_t_{o2\_2})*(1.0-lim\_t_{no3\_3})*lim\_t_{pocn\_14}$

continued on next page...

## Processes, continued from previous page

**recycling of sedimentary pocp to dic and PO4 using sulfate (sulfate reduction) (sediment only) [mol/m<sup>2</sup>/day]**

```
3*ohminus + 106*h3oplus + 53*so4 + t_pocp -> t_po4 + 53*t_h2s + 215*h2o + 106*
t_dic
p_sed_pocp_sulf = (lr_sed_rec*pocp_active)*(1.0-lim_t_o2_2)*(1.0-lim_t_no3_3)
                  *lim_t_pocp_13
```

**coupled nitrification and denitrification after mineralization of pocn-detritus in oxic sediments (sediment only) [mol/m<sup>2</sup>/day]**

```
t_nh4 + 0.75*t_o2 -> 0.5*h2o + h3oplus + 0.5*t_n2
(frac_denit_sed*p_sed_pocn_resp*theta(t_o2-5.0e-6))*
p_nh4_nitdenit_pocn_lim_t_nh4_11*lim_t_o2_2
=
```

**recycling of sedimentary detritus to ammonium using oxygen (respiration); sub-process for atmos\_tot nitrogen (sediment only) [mol/m<sup>2</sup>/day]**

```
-> t_nh4_with_atmos_tot_N
p_sed_resp_nh4 * ((1.0)*(1)*
p_sed_resp_nh4_atmosmax(0.0,min(1.0,t_sed_with_atmos_tot_N/max(0.00000000001,t_sed)
= ))) / ((1.0)*(1))
```

**recycling of sedimentary detritus to ammonium using nitrate (denitrification); sub-process for atmos\_tot nitrogen (sediment only) [mol/m<sup>2</sup>/day]**

```
-> t_nh4_with_atmos_tot_N
p_sed_denit_nh4_noN2 * ((1.0)*(1)*
p_sed_denit_nh4_noN2max(0.0,min(1.0,t_sed_with_atmos_tot_N/max(0.00000000001,t_sed)
= ))) / ((1.0)*(1))
```

**recycling of sedimentary detritus to ammonium using sulfate (sulfate reduction); sub-process for atmos\_tot nitrogen (sediment only) [mol/m<sup>2</sup>/day]**

```
-> t_nh4_with_atmos_tot_N
p_sed_sulf_nh4 * ((1.0)*(1)*
p_sed_sulf_nh4_atmosmax(0.0,min(1.0,t_sed_with_atmos_tot_N/max(0.00000000001,t_sed)
= ))) / ((1.0)*(1))
```

**recycling of sedimentary pocn to dic and NH4 using oxygen (respiration); sub-process for atmos\_tot nitrogen (sediment only) [mol/m<sup>2</sup>/day]**

```
-> t_nh4_with_atmos_tot_N
p_sed_pocn_resp * ((1.0)*(1)*
p_sed_pocn_resp_atmcmmax(0.0,min(1.0,t_sed_pocn_with_atmos_tot_N/max(0.00000000001,t_sed_pocn)
= ))) / ((1.0)*(1))
```

**recycling of sedimentary pocn to dic and NH4 using nitrate (denitrification); sub-process for atmos\_tot nitrogen (sediment only) [mol/m<sup>2</sup>/day]**

continued on next page...

## Processes, continued from previous page

```

-> t_nh4_with_atmos_tot_N
      p_sed_pocn_denit_noN2 * ((1.0)*(1)*
p_sed_pocn_denit_noN2max(0.0,min(1.0,t_sed_pocn_with_atmos_tot_N/max(0.00000000001,t_sed_pocn)
=      ))) / ((1.0)*(1))

```

recycling of sedimentary pocn to dic and NH4 using sulfate (sulfate reduction); sub-process for atmos\_tot nitrogen (sediment only) [mol/m<sup>2</sup>/day]

```

-> t_nh4_with_atmos_tot_N
      p_sed_pocn_sulf * ((1.0)*(1)*
p_sed_pocn_sulf_atmcmmax(0.0,min(1.0,t_pocn_with_atmos_tot_N/max(0.00000000001,t_pocn)
=      ))) / ((1.0)*(1))

```

recycling of sedimentary detritus to ammonium using oxygen (respiration); sub-process for atmos\_ship nitrogen (sediment only) [mol/m<sup>2</sup>/day]

```

-> t_nh4_with_atmos_ship_N
      p_sed_resp_nh4 * ((1.0)*(1)*
p_sed_resp_nh4_atmosmax(0.0,min(1.0,t_sed_with_atmos_ship_N/max(0.00000000001,t_sed)
=      ))) / ((1.0)*(1))

```

recycling of sedimentary detritus to ammonium using nitrate (denitrification); sub-process for atmos\_ship nitrogen (sediment only) [mol/m<sup>2</sup>/day]

```

-> t_nh4_with_atmos_ship_N
      p_sed_denit_nh4_noN2 * ((1.0)*(1)*
p_sed_denit_nh4_noN2max(0.0,min(1.0,t_sed_with_atmos_ship_N/max(0.00000000001,t_sed)
=      ))) / ((1.0)*(1))

```

recycling of sedimentary detritus to ammonium using sulfate (sulfate reduction); sub-process for atmos\_ship nitrogen (sediment only) [mol/m<sup>2</sup>/day]

```

-> t_nh4_with_atmos_ship_N
      p_sed_sulf_nh4 * ((1.0)*(1)*
p_sed_sulf_nh4_atmosmax(0.0,min(1.0,t_sed_with_atmos_ship_N/max(0.00000000001,t_sed)
=      ))) / ((1.0)*(1))

```

recycling of sedimentary pocn to dic and NH4 using oxygen (respiration); sub-process for atmos\_ship nitrogen (sediment only) [mol/m<sup>2</sup>/day]

```

-> t_nh4_with_atmos_ship_N
      p_sed_pocn_resp * ((1.0)*(1)*
p_sed_pocn_resp_atmcmmax(0.0,min(1.0,t_sed_pocn_with_atmos_ship_N/max(0.00000000001,t_sed_pocn)
=      ))) / ((1.0)*(1))

```

recycling of sedimentary pocn to dic and NH4 using nitrate (denitrification); sub-process for atmos\_ship nitrogen (sediment only) [mol/m<sup>2</sup>/day]

```

-> t_nh4_with_atmos_ship_N
      p_sed_pocn_denit_noN2 * ((1.0)*(1)*
p_sed_pocn_denit_noN2max(0.0,min(1.0,t_sed_pocn_with_atmos_ship_N/max(0.00000000001,t_sed_pocn)
=      ))) / ((1.0)*(1))

```

continued on next page...

## Processes, continued from previous page

recycling of sedimentary pocn to dic and NH4 using sulfate (sulfate reduction);  
sub-process for atmos\_ship nitrogen (sediment only) [mol/m<sup>2</sup>/day]

```
-> t_nh4_with_atmos_ship_N
      p_sed_pocn_sulf * ((1.0)*(1)*
p_sed_pocn_sulf_atmcmx(0.0,min(1.0,t_pocn_with_atmos_ship_N/max(0.00000000001,t_pocn)
=      ))) / ((1.0)*(1))
```

## Auxiliary variables

fraction of ammonium that is immediately nitrified and denitrified after  
remineralization in oxic sediments

```
frac_denit_sed =   frac_denit_scal*(0.5+0.5*exp(-0.01*cgt_bottomdepth))
```

total carbon in sediment layer [mol/m<sup>2</sup>]

```
sed_tot =          t_sed*rfr_c + t_sed_poc + t_sed_pocn*rfr_c + t_sed_pocp*
                  rfr_cp
```

total carbon in active sediment layer [mol/m<sup>2</sup>]

```
sed_tot_active =   max(0.0,min(sed_tot,sed_max*rfr_c))
```

detritus in active sediment layer [mol/m<sup>2</sup>]

```
sed_active =       sed_tot_active * t_sed/sed_tot
```

recycling rate of sediment detritus, limited by oxygen [1/d]

```
lr_sed_rec =       r_sed_rec*exp(q10_sed_rec*cgt_temp)*(1.0-reduced_rec*
                  theta(2*t_h2s-t_o2))
```

poc in active sediment layer [mol/m<sup>2</sup>]

```
poc_active =       sed_tot_active * t_sed_poc/sed_tot
```

pocn in active sediment layer [mol/m<sup>2</sup>]

```
pocn_active =      sed_tot_active * t_sed_pocn/sed_tot
```

pocp in active sediment layer [mol/m<sup>2</sup>]

```
pocp_active =      sed_tot_active * t_sed_pocp/sed_tot
```

## Constants

nitrate half-saturation concentration for denitrification in the water column  
[mol/kg]

```
no3_min_sed_denit = 1.423E-7
```

q10 rule factor for detritus recycling in the sediment [1/K]

```
q10_sed_rec =      0.175
```

maximum recycling rate of sediment to ammonium [1/day]

continued on next page...



| Constants, continued from previous page                                      |                                                                   |
|------------------------------------------------------------------------------|-------------------------------------------------------------------|
| r_sed_rec =                                                                  | 0.002                                                             |
| <b>redfield ratio C/N</b>                                                    |                                                                   |
| rfr_c =                                                                      | 6.625                                                             |
| <b>redfield ratio P/N</b>                                                    |                                                                   |
| rfr_p =                                                                      | 0.0625                                                            |
| <b>redfield ratio C/P</b>                                                    |                                                                   |
| rfr_cp =                                                                     | 106.0                                                             |
| <b>maximum sediment detritus concentration that feels erosion [mol/m**2]</b> |                                                                   |
| sed_max =                                                                    | 1.0                                                               |
| <b>scaling frac_denit_sed</b>                                                |                                                                   |
| frac_denit_scal =                                                            | 1.0                                                               |
| <b>decrease recycling in sed under anoxia by reduce_rec</b>                  |                                                                   |
| reduced_rec =                                                                | 0.8                                                               |
| Process limitation factors                                                   |                                                                   |
| lim_t_o2_2 =                                                                 | theta(t_o2-0.0)                                                   |
| lim_t_nh4_11 =                                                               | theta(t_nh4-0.0)                                                  |
| lim_t_no3_3 =                                                                | t_no3*t_no3/(t_no3*t_no3+no3_min_sed_denit*<br>no3_min_sed_denit) |
| lim_t_sed_20 =                                                               | theta(t_sed-0.0)                                                  |
| lim_t_sed_poc_21 =                                                           | theta(t_sed_poc-0.0)                                              |
| lim_t_sed_pocn_26 =                                                          | theta(t_sed_pocn-0.0)                                             |
| lim_t_sed_pocp_27 =                                                          | theta(t_sed_pocp-0.0)                                             |
| lim_t_pocp_13 =                                                              | theta(t_pocp-0.0)                                                 |
| lim_t_pocn_14 =                                                              | theta(t_pocn-0.0)                                                 |

### 3.3 Process type BGC/benthic/P\_retention

| Processes                                                                                                                                                                                                                                                                                                         |
|-------------------------------------------------------------------------------------------------------------------------------------------------------------------------------------------------------------------------------------------------------------------------------------------------------------------|
| retention of phosphate in the sediment under oxic conditions (sediment only) [mol/m <sup>2</sup> /day]<br>$\text{rfr\_p*fe3plus} + \text{rfr\_p*t\_po4} \rightarrow \text{rfr\_p*t\_ips}$<br>$\text{p\_po4\_retent\_ips} = (\text{p\_sed\_resp\_nh4*frac\_po4retent})*\text{lim\_t\_o2\_4}*\text{lim\_t\_po4\_9}$ |
| liberation of phosphate from the sediment under anoxic conditions (sediment only) [mol/m <sup>2</sup> /day]<br>$\text{t\_ips} \rightarrow \text{t\_po4} + \text{fe3plus}$<br>$\text{p\_ips\_liber\_po4} = (\text{t\_ips*r\_ips\_liber})*\text{lim\_t\_h2s\_5}*\text{lim\_t\_ips\_22}$                             |
| Auxiliary variables                                                                                                                                                                                                                                                                                               |
| fraction of phosphate which is retained as iron-bound phosphate instead of being released after mineralization in the sediment [1]<br>$\text{frac\_po4retent} = \text{ret\_po4\_1} + \text{ret\_po4\_2}*\text{theta}(\text{cgt\_latitude}-60.75)$                                                                 |
| Constants                                                                                                                                                                                                                                                                                                         |
| minimum h2s concentration for liberation of iron phosphate from the sediment [mol/kg]<br>$\text{h2s\_min\_po4\_liber} = 1.0\text{E}-6$                                                                                                                                                                            |
| oxygen half-saturation concentration for retention of phosphate during sediment denitrification [mol/kg]<br>$\text{o2\_min\_po4\_retent} = 0.0000375$                                                                                                                                                             |
| PO4 liberation rate under anoxic conditions [1/day]<br>$\text{r\_ips\_liber} = 0.1$                                                                                                                                                                                                                               |
| redfield ratio P/N<br>$\text{rfr\_p} = 0.0625$                                                                                                                                                                                                                                                                    |
| PO4 retention in oxic sediments<br>$\text{ret\_po4\_1} = 0.15$                                                                                                                                                                                                                                                    |
| additional PO4 retention in oxic sediments of the Bothnian Sea<br>$\text{ret\_po4\_2} = 0.5$                                                                                                                                                                                                                      |
| Process limitation factors                                                                                                                                                                                                                                                                                        |
| $\text{lim\_t\_o2\_4} = \text{t\_o2*t\_o2}/(\text{t\_o2*t\_o2}+\text{o2\_min\_po4\_retent}*\text{o2\_min\_po4\_retent})$                                                                                                                                                                                          |
| $\text{lim\_t\_po4\_9} = \text{theta}(\text{t\_po4}-0.0)$                                                                                                                                                                                                                                                         |
| $\text{lim\_t\_h2s\_5} = \text{theta}(\text{t\_h2s}-\text{h2s\_min\_po4\_liber})$                                                                                                                                                                                                                                 |
| continued on next page...                                                                                                                                                                                                                                                                                         |

## Process limitation factors, continued from previous page

```
lim_t_ips_22 =      theta(t_ips-0.0)
```

### 3.4 Process type BGC/pelagic/mineralisation

| Processes                                                                                                                                                                                                                                                                                                                         |
|-----------------------------------------------------------------------------------------------------------------------------------------------------------------------------------------------------------------------------------------------------------------------------------------------------------------------------------|
| <b>recycling of POC using nitrate (denitrification) [mol/kg/day]</b><br>$t_{poc} + 0.8*t_{no3} + 0.8*h3oplus \rightarrow t_{dic} + 2.2*h2o + 0.4*t_{n2}$<br>$p_{poc\_denit} = (t_{poc}*r_{poc\_rec}*exp(q10\_det\_rec*cgt\_temp))*(1.0-lim\_t\_o2\_0)*lim\_t\_no3\_1*lim\_t\_poc\_12$                                             |
| <b>Mineralization of POC, e-acceptor sulfate (sulfate reduction) [mol/kg/day]</b><br>$h3oplus + 0.5*so4 + t_{poc} \rightarrow 2*h2o + 0.5*t_{h2s} + t_{dic}$<br>$p_{poc\_sulf} = (t_{poc}*r_{poc\_rec}*exp(q10\_det\_rec*cgt\_temp))*(1.0-lim\_t\_o2\_0)*(1.0-lim\_t\_no3\_1)*lim\_t\_poc\_12$                                    |
| <b>respiration of POCP [mol/kg/day]</b><br>$3*H2O + t_{pocp} + 106*t_{o2} \rightarrow 3*h3oplus + 106*H2O + t_{po4} + 106*t_{dic}$<br>$p_{pocp\_resp} = (t_{pocp} * lr_{pocp} * exp(q10\_det\_rec * cgt\_temp))*lim\_t\_o2\_0*lim\_t\_pocp\_13$                                                                                   |
| <b>recycling of POC using nitrate (denitrification) [mol/kg/day]</b><br>$3*ohminus + 84.8*h3oplus + 84.8*t_{no3} + t_{pocp} \rightarrow t_{po4} + 42.4*t_{n2} + 236.2*H2O + 106*t_{dic}$<br>$p_{pocp\_denit} = (t_{pocp}*r_{pocp\_rec}*exp(q10\_det\_rec*cgt\_temp))*(1.0-lim\_t\_o2\_0)*lim\_t\_no3\_1*lim\_t\_pocp\_13$         |
| <b>Mineralization of POC, e-acceptor sulfate (sulfate reduction) [mol/kg/day]</b><br>$3*ohminus + 106*h3oplus + 53*so4 + t_{pocp} \rightarrow t_{po4} + 53*t_{h2s} + 215*h2o + 106*t_{dic}$<br>$p_{pocp\_sulf} = (t_{pocp}*r_{pocp\_rec}*exp(q10\_det\_rec*cgt\_temp))*(1.0-lim\_t\_o2\_0)*(1.0-lim\_t\_no3\_1)*lim\_t\_pocp\_13$ |
| <b>respiration of POCN [mol/kg/day]</b><br>$t_{pocn} + 6.625*t_{o2} + 0.5*h3oplus \rightarrow 6.625*t_{dic} + t_{nh4} + 6.625*H2O + 0.5*ohminus$<br>$p_{pocn\_resp} = (t_{pocn} * lr_{pocn} * exp(q10\_det\_rec * cgt\_temp))*lim\_t\_o2\_0*lim\_t\_pocn\_14$                                                                     |
| <b>recycling of POCN using nitrate (denitrification) [mol/kg/day]</b><br>$t_{pocn} + 5.8*h3oplus \rightarrow 6.625*t_{dic} + t_{nh4} + 14.575*H2O + 0.5*ohminus$<br>$p_{pocn\_denit\_noN2} = (t_{pocn}*r_{pocn\_rec}*exp(q10\_det\_rec*cgt\_temp))*(1.0-lim\_t\_o2\_0)*lim\_t\_no3\_1*lim\_t\_pocn\_14$                           |
| <b>recycling of POCN using nitrate (denitrification) [mol/kg/day]</b><br>$5.3*t_{no3} \rightarrow 2.65*t_{n2}$<br>$p_{pocn\_denit\_wiN2} = (t_{pocn}*r_{pocn\_rec}*exp(q10\_det\_rec*cgt\_temp))*(1.0-lim\_t\_o2\_0)*lim\_t\_no3\_1$                                                                                              |
| continued on next page...                                                                                                                                                                                                                                                                                                         |

## Processes, continued from previous page

**Mineralization of POCN, e-acceptor sulfate (sulfate reduction) [mol/kg/day]**

$$7.125 \cdot h3oplus + 3.3125 \cdot S04 + t\_pocn \rightarrow 0.5 \cdot ohminus + 13.25 \cdot H2O + 3.3125 \cdot t\_h2s + t\_nh4 + 6.625 \cdot t\_dic$$

$$p\_pocn\_sulf = (t\_pocn \cdot r\_pocn\_rec \cdot \exp(q10\_det\_rec \cdot cgt\_temp)) \cdot (1.0 - \lim\_t\_o2\_0) \cdot (1.0 - \lim\_t\_no3\_1) \cdot \lim\_t\_pocn\_14$$
**recycling of detritus using oxygen (respiration) [mol/kg/day]**

$$0.8125 \cdot h3oplus + 6.625 \cdot t\_o2 + t\_det \rightarrow 7.4375 \cdot h2o + rfr\_c \cdot t\_dic + rfr\_p \cdot t\_po4 + t\_nh4$$

$$p\_det\_resp\_nh4 = (t\_det \cdot r\_det\_rec \cdot \exp(q10\_det\_rec \cdot cgt\_temp)) \cdot \lim\_t\_o2\_0 \cdot \lim\_t\_det\_19$$
**recycling of detritus using nitrate (denitrification) [mol/kg/day]**

$$6.1125 \cdot h3oplus + 5.3 \cdot t\_no3 + t\_det \rightarrow rfr\_c \cdot t\_dic + rfr\_p \cdot t\_po4 + t\_nh4 + 15.3875 \cdot h2o + 2.65 \cdot t\_n2$$

$$p\_det\_denit\_nh4 = (t\_det \cdot r\_det\_rec \cdot \exp(q10\_det\_rec \cdot cgt\_temp)) \cdot (1.0 - \lim\_t\_o2\_0) \cdot \lim\_t\_no3\_1 \cdot \lim\_t\_det\_19$$
**recycling of detritus using sulfate (sulfate reduction) [mol/kg/day]**

$$t\_det + 3.3125 \cdot so4 + 7.4375 \cdot h3oplus \rightarrow t\_nh4 + rfr\_p \cdot t\_po4 + rfr\_c \cdot t\_dic + 3.3125 \cdot t\_h2s + 14.0625 \cdot h2o$$

$$p\_det\_sulf\_nh4 = (t\_det \cdot r\_det\_rec \cdot \exp(q10\_det\_rec \cdot cgt\_temp)) \cdot (1.0 - \lim\_t\_o2\_0) \cdot (1.0 - \lim\_t\_no3\_1) \cdot \lim\_t\_det\_19$$
**recycling of DOC using nitrate (denitrification) [mol/kg/day]**

$$t\_doc + 0.8 \cdot t\_no3 + 0.8 \cdot h3oplus \rightarrow t\_dic + 2.2 \cdot h2o + 0.4 \cdot t\_n2$$

$$p\_doc\_denit = (t\_doc \cdot r\_doc\_rec \cdot \exp(q10\_det\_rec \cdot cgt\_temp)) \cdot (1.0 - \lim\_t\_o2\_0) \cdot \lim\_t\_no3\_1 \cdot \lim\_t\_doc\_28$$
**Mineralization of DOC, e-acceptor sulfate (sulfate reduction) [mol/kg/day]**

$$h3oplus + 0.5 \cdot so4 + t\_doc \rightarrow 2 \cdot h2o + 0.5 \cdot t\_h2s + t\_dic$$

$$p\_doc\_sulf = (t\_doc \cdot r\_doc\_rec \cdot \exp(q10\_det\_rec \cdot cgt\_temp)) \cdot (1.0 - \lim\_t\_o2\_0) \cdot (1.0 - \lim\_t\_no3\_1) \cdot \lim\_t\_doc\_28$$
**respiration of DOP [mol/kg/day]**

$$106 \cdot t\_o2 + t\_dop + 3 \cdot H2O \rightarrow 106 \cdot t\_dic + t\_po4 + 106 \cdot H2O + 3 \cdot h3oplus$$

$$p\_dop\_resp = (t\_dop \cdot lr\_dop \cdot \exp(q10\_det\_rec \cdot cgt\_temp)) \cdot \lim\_t\_o2\_0 \cdot \lim\_t\_dop\_29$$
**recycling of DOP using nitrate (denitrification) [mol/kg/day]**

$$t\_dop + 84.8 \cdot t\_no3 + 84.8 \cdot h3oplus + 3 \cdot ohminus \rightarrow 106 \cdot t\_dic + 236.2 \cdot H2O + 42.4 \cdot t\_n2 + t\_po4$$

$$p\_dop\_denit = (t\_dop \cdot r\_dop\_rec \cdot \exp(q10\_det\_rec \cdot cgt\_temp)) \cdot (1.0 - \lim\_t\_o2\_0) \cdot \lim\_t\_no3\_1 \cdot \lim\_t\_dop\_29$$

continued on next page...

## Processes, continued from previous page

**Mineralization of DOP, e-acceptor sulfate (sulfate reduction) [mol/kg/day]**

$t_{dop} + 53 \cdot so_4 + 106 \cdot h_3oplus + 3 \cdot ohminus \rightarrow 106 \cdot t_{dic} + 215 \cdot h_2o + 53 \cdot t_{h_2s} + t_{po_4}$

$p_{dop\_sulf} = (t_{dop} \cdot r_{dop\_rec} \cdot \exp(q_{10\_det\_rec} \cdot cgt\_temp)) \cdot (1.0 - \lim_{t\_o_2\_0}) \cdot (1.0 - \lim_{t\_no_3\_1}) \cdot \lim_{t\_dop\_29}$

**respiration of DON [mol/kg/day]**

$t_{don} + 6.625 \cdot t_{o_2} + 0.5 \cdot h_3oplus \rightarrow 6.625 \cdot t_{dic} + t_{nh_4} + 6.625 \cdot H_2O + 0.5 \cdot ohminus$

$p_{don\_resp} = (t_{don} \cdot lr_{don} \cdot \exp(q_{10\_det\_rec} \cdot cgt\_temp)) \cdot \lim_{t\_o_2\_0} \cdot \lim_{t\_don\_30}$

**recycling of DON using nitrate (denitrification) [mol/kg/day]**

$t_{don} + 5.8 \cdot h_3oplus \rightarrow 6.625 \cdot t_{dic} + t_{nh_4} + 14.575 \cdot H_2O + 0.5 \cdot ohminus$

$p_{don\_denit\_noN_2} = (t_{don} \cdot r_{don\_rec} \cdot \exp(q_{10\_det\_rec} \cdot cgt\_temp)) \cdot (1.0 - \lim_{t\_o_2\_0}) \cdot \lim_{t\_no_3\_1} \cdot \lim_{t\_don\_30}$

**recycling of DON using nitrate (denitrification) [mol/kg/day]**

$5.3 \cdot t_{no_3} \rightarrow 2.65 \cdot t_{n_2}$

$p_{don\_denit\_wiN_2} = (t_{don} \cdot r_{don\_rec} \cdot \exp(q_{10\_det\_rec} \cdot cgt\_temp)) \cdot (1.0 - \lim_{t\_o_2\_0}) \cdot \lim_{t\_no_3\_1}$

**Mineralization of DON, e-acceptor sulfate (sulfate reduction) [mol/kg/day]**

$t_{don} + 3.3125 \cdot S_0_4 + 7.125 \cdot h_3oplus \rightarrow 6.625 \cdot t_{dic} + t_{nh_4} + 3.3125 \cdot t_{h_2s} + 13.25 \cdot H_2O + 0.5 \cdot ohminus$

$p_{don\_sulf} = (t_{don} \cdot r_{don\_rec} \cdot \exp(q_{10\_det\_rec} \cdot cgt\_temp)) \cdot (1.0 - \lim_{t\_o_2\_0}) \cdot (1.0 - \lim_{t\_no_3\_1}) \cdot \lim_{t\_don\_30}$

**respiration of POCN; sub-process for atmos\_tot nitrogen [mol/kg/day]**

$\rightarrow t_{nh_4\_with\_atmos\_tot\_N}$

$$p_{pocn\_resp} \cdot ((1.0) \cdot (1) \cdot p_{pocn\_resp\_atmos\_tmax}(0.0, \min(1.0, t_{pocn\_with\_atmos\_tot\_N} / \max(0.00000000001, t_{pocn})) / ((1.0) \cdot (1))$$

**recycling of POCN using nitrate (denitrification); sub-process for atmos\_tot nitrogen [mol/kg/day]**

$\rightarrow t_{nh_4\_with\_atmos\_tot\_N}$

$$p_{pocn\_denit\_noN_2} \cdot ((1.0) \cdot (1) \cdot p_{pocn\_denit\_noN_2\_atmax}(0.0, \min(1.0, t_{pocn\_with\_atmos\_tot\_N} / \max(0.00000000001, t_{pocn})) / ((1.0) \cdot (1))$$

**Mineralization of POCN, e-acceptor sulfate (sulfate reduction); sub-process for atmos\_tot nitrogen [mol/kg/day]**

continued on next page...

## Processes, continued from previous page

```

-> t_nh4_with_atmos_tot_N
      p_pocn_sulf * ((1.0)*(1)*
p_pocn_sulf_atmos_totmax(0.0,min(1.0,t_pocn_with_atmos_tot_N/max(0.00000000001,t_pocn)
=      ))) / ((1.0)*(1))

```

**recycling of detritus using oxygen (respiration); sub-process for atmos\_tot nitrogen [mol/kg/day]**

```

-> t_nh4_with_atmos_tot_N
      p_det_resp_nh4 * ((1.0)*(1)*
p_det_resp_nh4_atmos_totmax(0.0,min(1.0,t_det_with_atmos_tot_N/max(0.00000000001,t_det)
=      ))) / ((1.0)*(1))

```

**recycling of detritus using sulfate (sulfate reduction); sub-process for atmos\_tot nitrogen [mol/kg/day]**

```

-> t_nh4_with_atmos_tot_N
      p_det_sulf_nh4 * ((1.0)*(1)*
p_det_sulf_nh4_atmos_totmax(0.0,min(1.0,t_det_with_atmos_tot_N/max(0.00000000001,t_det)
=      ))) / ((1.0)*(1))

```

**respiration of DON; sub-process for atmos\_tot nitrogen [mol/kg/day]**

```

-> t_nh4_with_atmos_tot_N
      p_don_resp * ((1.0)*(1)*
p_don_resp_atmos_totmax(0.0,min(1.0,t_don_with_atmos_tot_N/max(0.00000000001,t_don)
=      ))) / ((1.0)*(1))

```

**recycling of DON using nitrate (denitrification); sub-process for atmos\_tot nitrogen [mol/kg/day]**

```

-> t_nh4_with_atmos_tot_N
      p_don_denit_noN2 * ((1.0)*(1)*
p_don_denit_noN2_atmos_totmax(0.0,min(1.0,t_don_with_atmos_tot_N/max(0.00000000001,t_don)
=      ))) / ((1.0)*(1))

```

**Mineralization of DON, e-acceptor sulfate (sulfate reduction); sub-process for atmos\_tot nitrogen [mol/kg/day]**

```

-> t_nh4_with_atmos_tot_N
      p_don_sulf * ((1.0)*(1)*
p_don_sulf_atmos_totmax(0.0,min(1.0,t_don_with_atmos_tot_N/max(0.00000000001,t_don)
=      ))) / ((1.0)*(1))

```

**respiration of POCN; sub-process for atmos\_ship nitrogen [mol/kg/day]**

```

-> t_nh4_with_atmos_ship_N
      p_pocn_resp * ((1.0)*(1)*
p_pocn_resp_atmos_shipmax(0.0,min(1.0,t_pocn_with_atmos_ship_N/max(0.00000000001,t_pocn)
=      ))) / ((1.0)*(1))

```

continued on next page...

## Processes, continued from previous page

**recycling of POCN using nitrate (denitrification); sub-process for atmos\_ship nitrogen [mol/kg/day]**

```
-> t_nh4_with_atmos_ship_N
      p_pocn_denit_noN2 * ((1.0)*(1)*
p_pocn_denit_noN2_atmax(0.0,min(1.0,t_pocn_with_atmos_ship_N/max(0.00000000001,t_pocn)
=      ))) / ((1.0)*(1))
```

**Mineralization of POCN, e-acceptor sulfate (sulfate reduction); sub-process for atmos\_ship nitrogen [mol/kg/day]**

```
-> t_nh4_with_atmos_ship_N
      p_pocn_sulf * ((1.0)*(1)*
p_pocn_sulf_atmos_shmax(0.0,min(1.0,t_pocn_with_atmos_ship_N/max(0.00000000001,t_pocn)
=      ))) / ((1.0)*(1))
```

**recycling of detritus using oxygen (respiration); sub-process for atmos\_ship nitrogen [mol/kg/day]**

```
-> t_nh4_with_atmos_ship_N
      p_det_resp_nh4 * ((1.0)*(1)*
p_det_resp_nh4_atmosmax(0.0,min(1.0,t_det_with_atmos_ship_N/max(0.00000000001,t_det)
=      ))) / ((1.0)*(1))
```

**recycling of detritus using sulfate (sulfate reduction); sub-process for atmos\_ship nitrogen [mol/kg/day]**

```
-> t_nh4_with_atmos_ship_N
      p_det_sulf_nh4 * ((1.0)*(1)*
p_det_sulf_nh4_atmosmax(0.0,min(1.0,t_det_with_atmos_ship_N/max(0.00000000001,t_det)
=      ))) / ((1.0)*(1))
```

**respiration of DON; sub-process for atmos\_ship nitrogen [mol/kg/day]**

```
-> t_nh4_with_atmos_ship_N
      p_don_resp * ((1.0)*(1)*
p_don_resp_atmos_shmax(0.0,min(1.0,t_don_with_atmos_ship_N/max(0.00000000001,t_don)
=      ))) / ((1.0)*(1))
```

**recycling of DON using nitrate (denitrification); sub-process for atmos\_ship nitrogen [mol/kg/day]**

```
-> t_nh4_with_atmos_ship_N
      p_don_denit_noN2 * ((1.0)*(1)*
p_don_denit_noN2_atmax(0.0,min(1.0,t_don_with_atmos_ship_N/max(0.00000000001,t_don)
=      ))) / ((1.0)*(1))
```

**Mineralization of DON, e-acceptor sulfate (sulfate reduction); sub-process for atmos\_ship nitrogen [mol/kg/day]**

continued on next page...



## Processes, continued from previous page

```

-> t_nh4_with_atmos_ship_N
      p_don_sulf * ((1.0)*(1)*
p_don_sulf_atmos_shimax(0.0,min(1.0,t_don_with_atmos_ship_N/max(0.00000000001,t_don)
=      ))) / ((1.0)*(1))

```

## Auxiliary variables

dissolved inorganic nitrogen [mol/kg]

```
din = t_no3+t_nh4
```

squared DIN [mol<sup>2</sup>/kg<sup>2</sup>]

```
din_sq = din*din
```

squared phosphate [mol<sup>2</sup>/kg<sup>2</sup>]

```
po4_sq = t_po4*t_po4
```

modifies pocp recycling towards Redfield ratio if PO<sub>4</sub> is depleted

```
ref_p_sw = (1 - (po4_sq/(rfr_p*din_min_lpp*rfr_p*din_min_lpp+po4_sq)))
          /(1+exp(6.0*(1-din/(t_po4/rfr_p+epsilon))))
```

modifies pocn recycling towards Redfield ratio if DIN is depleted

```
ref_n_sw = (1 - (din_sq/(din_min_lpp*din_min_lpp+din_sq)))/(1+exp(6.0*
          (1-t_po4/rfr_p/(din+epsilon))))
```

add an additional POCP recycling if PO<sub>4</sub> below Redfield but sufficient DIN

```
lr_pocp = r_pocp_rec*(1 + fac_enh_rec*ref_p_sw)
```

add an additional DOP recycling if PO<sub>4</sub> is below Redfield but sufficient DIN

```
lr_dop = r_dop_rec*(1 + fac_enh_rec*ref_p_sw)
```

add an additional POCN recycling if DIN below Redfield but sufficient PO<sub>4</sub>

```
lr_pocn = r_pocn_rec*(1 + fac_enh_rec*ref_n_sw)
```

add an additional DON recycling if DIN below Redfield but sufficient PO<sub>4</sub>

```
lr_don = r_don_rec*(1 + fac_enh_rec*ref_n_sw)
```

## Constants

DIN half saturation constant for large-cell phytoplankton growth [mol/kg]

```
din_min_lpp = 1.0E-6
```

no division by 0

```
epsilon = 4.5E-17
```

minimum no<sub>3</sub> concentration for recycling of detritus using nitrate (denitrification)

```
no3_min_det_denit = 1.0E-9
```

continued on next page...

| Constants, continued from previous page                           |                                             |
|-------------------------------------------------------------------|---------------------------------------------|
| oxygen half-saturation constant for detritus recycling [mol/kg]   |                                             |
| o2_min_det_resp =                                                 | 1.0E-6                                      |
| q10 rule factor for recycling [1/K]                               |                                             |
| q10_det_rec =                                                     | 0.15                                        |
| recycling rate (detritus to ammonium) at 0°C [1/day]              |                                             |
| r_det_rec =                                                       | 0.003                                       |
| redfield ratio C/N                                                |                                             |
| rfr_c =                                                           | 6.625                                       |
| redfield ratio P/N                                                |                                             |
| rfr_p =                                                           | 0.0625                                      |
| recycling rate (poc to dic) at 0°C [1/day]                        |                                             |
| r_poc_rec =                                                       | 0.003                                       |
| recycling rate (pocp to dic and po4) at 0°C [1/day]               |                                             |
| r_pocp_rec =                                                      | 0.002                                       |
| recycling rate (pocn to dic and nh4) at 0°C [1/day]               |                                             |
| r_pocn_rec =                                                      | 0.002                                       |
| enhance recyclig of DON,POCN/DOP,POCP in case of limiting DIN/DIP |                                             |
| fac_enh_rec =                                                     | 10.0                                        |
| recycling rate (doc to dic) at 0°C [1/day]                        |                                             |
| r_doc_rec =                                                       | 0.001                                       |
| recycling rate (don to dic and NH4) at 0°C [1/day]                |                                             |
| r_don_rec =                                                       | 0.001                                       |
| recycling rate (dop to dic and PO4) at 0°C [1/day]                |                                             |
| r_dop_rec =                                                       | 0.001                                       |
| Process limitation factors                                        |                                             |
| lim_t_o2_0 =                                                      | $1.0 - \exp(-t_{o2}/o2\_min\_det\_resp)$    |
| lim_t_no3_1 =                                                     | $1.0 - \exp(-t_{no3}/no3\_min\_det\_denit)$ |
| lim_t_doc_28 =                                                    | $\theta(t\_doc - 0.0)$                      |
| lim_t_dop_29 =                                                    | $\theta(t\_dop - 0.0)$                      |
| lim_t_don_30 =                                                    | $\theta(t\_don - 0.0)$                      |
| continued on next page...                                         |                                             |

## Process limitation factors, continued from previous page

```
lim_t_det_19 =      theta(t_det-0.0)
```

```
lim_t_poc_12 =      theta(t_poc-0.0)
```

```
lim_t_pocp_13 =      theta(t_pocp-0.0)
```

```
lim_t_pocn_14 =      theta(t_pocn-0.0)
```

### 3.5 Process type BGC/pelagic/phytoplankton

| Processes                                                                                                                                                                                                                                                                                                                                                                         |
|-----------------------------------------------------------------------------------------------------------------------------------------------------------------------------------------------------------------------------------------------------------------------------------------------------------------------------------------------------------------------------------|
| <b>assimilation of nitrate by large-cell phytoplankton [mol/kg/day]</b><br>$1.1875 \cdot h3oplus + 6.4375 \cdot h2o + rfr\_c \cdot t\_dic + rfr\_p \cdot t\_po4 + t\_no3 \rightarrow 8.625 \cdot t\_o2 + t\_lpp$<br>$p\_no3\_assim\_lpp = (lpp\_plus\_lpp0 \cdot lr\_assim\_lpp \cdot t\_no3 / (din + epsilon)) \cdot lim\_t\_dic\_8 \cdot lim\_t\_po4\_9 \cdot lim\_t\_no3\_10$  |
| <b>assimilation of ammonium by large-cell phytoplankton [mol/kg/day]</b><br>$t\_nh4 + rfr\_p \cdot t\_po4 + rfr\_c \cdot t\_dic + 7.4375 \cdot h2o \rightarrow t\_lpp + 6.625 \cdot t\_o2 + 0.8125 \cdot h3oplus$<br>$p\_nh4\_assim\_lpp = (lpp\_plus\_lpp0 \cdot lr\_assim\_lpp \cdot t\_nh4 / (din + epsilon)) \cdot lim\_t\_nh4\_11 \cdot lim\_t\_po4\_9 \cdot lim\_t\_dic\_8$ |
| <b>assimilation of nitrate by small-cell phytoplankton [mol/kg/day]</b><br>$1.1875 \cdot h3oplus + 6.4375 \cdot h2o + rfr\_c \cdot t\_dic + rfr\_p \cdot t\_po4 + t\_no3 \rightarrow 8.625 \cdot t\_o2 + t\_spp$<br>$p\_no3\_assim\_spp = (spp\_plus\_spp0 \cdot lr\_assim\_spp \cdot t\_no3 / (din + epsilon)) \cdot lim\_t\_dic\_8 \cdot lim\_t\_po4\_9 \cdot lim\_t\_no3\_10$  |
| <b>assimilation of ammonium by small-cell phytoplankton [mol/kg/day]</b><br>$t\_nh4 + rfr\_p \cdot t\_po4 + rfr\_c \cdot t\_dic + 7.4375 \cdot h2o \rightarrow t\_spp + 6.625 \cdot t\_o2 + 0.8125 \cdot h3oplus$<br>$p\_nh4\_assim\_spp = (spp\_plus\_spp0 \cdot lr\_assim\_spp \cdot t\_nh4 / (din + epsilon)) \cdot lim\_t\_nh4\_11 \cdot lim\_t\_po4\_9 \cdot lim\_t\_dic\_8$ |
| <b>fixation of dinitrogen by diazotroph cyanobacteria [mol/kg/day]</b><br>$7.9375 \cdot h2o + rfr\_c \cdot t\_dic + rfr\_p \cdot t\_po4 + 0.5 \cdot t\_n2 + 0.1875 \cdot h3oplus \rightarrow 7.375 \cdot t\_o2 + t\_cya$<br>$p\_n2\_assim\_cya = (cya\_plus\_cya0 \cdot lr\_assim\_cya) \cdot lim\_t\_dic\_8 \cdot lim\_t\_po4\_9 \cdot lim\_t\_n2\_7$                            |
| <b>Production of DOC by LPP [mol/kg/day]</b><br>$t\_dic + h2o \rightarrow t\_doc + t\_o2$<br>$p\_assim\_lpp\_doc = (rfr\_c \cdot t\_lpp \cdot lr\_assim\_lpp\_doc) \cdot lim\_t\_dic\_8$                                                                                                                                                                                          |
| <b>Production of DOC by SPP [mol/kg/day]</b><br>$t\_dic + h2o \rightarrow t\_doc + t\_o2$<br>$p\_assim\_spp\_doc = (rfr\_c \cdot t\_spp \cdot lr\_assim\_spp\_doc) \cdot lim\_t\_dic\_8$                                                                                                                                                                                          |
| <b>Production of POC by CYA [mol/kg/day]</b><br>$t\_dic + h2o \rightarrow t\_doc + t\_o2$<br>$p\_assim\_cya\_doc = (rfr\_c \cdot t\_cya \cdot lr\_assim\_cya\_doc) \cdot lim\_t\_dic\_8$                                                                                                                                                                                          |
| continued on next page...                                                                                                                                                                                                                                                                                                                                                         |

## Processes, continued from previous page

**Production of DOP by LPP [mol/kg/day]**

```
106*t_dic + t_po4 + 106*h2o + 3*h3oplus -> t_dop + 106*t_o2 + 3*h2o
p_assim_lpp_dop = (rfr_p * t_lpp * lr_assim_lpp_dop)*lim_t_dic_8*lim_t_po4_9
```

**Production of DOP by SPP [mol/kg/day]**

```
3*h3oplus + 106*h2o + t_po4 + 106*t_dic -> 3*h2o + 106*t_o2 + t_dop
p_assim_spp_dop = (rfr_p * t_spp * lr_assim_spp_dop)*lim_t_po4_9*lim_t_dic_8
```

**Production of DON by LPP [mol/kg/day]**

```
6.625*t_dic + t_nh4 + 6.625*H2O + ohminus -> t_don + 6.625*t_o2 + H2O
p_nh4_assim_lpp_don (t_lpp * lr_assim_lpp_don*t_nh4/(din+epsilon))*lim_t_dic_8*
= lim_t_nh4_11
```

**Production of DON by LPP [mol/kg/day]**

```
h3oplus + 6.625*H2O + t_no3 + 6.625*t_dic -> 8.625*t_o2 + t_don
p_no3_assim_lpp_don (t_lpp * lr_assim_lpp_don*t_no3/(din+epsilon))*
= lim_t_no3_10*lim_t_dic_8
```

**Production of DON by SPP [mol/kg/day]**

```
ohminus + 6.625*H2O + t_nh4 + 6.625*t_dic -> H2O + 6.625*t_o2 + t_don
p_nh4_assim_spp_don (t_spp * lr_assim_spp_don*t_nh4/(din+epsilon))*
= lim_t_nh4_11*lim_t_dic_8
```

**Production of DON by SPP [mol/kg/day]**

```
6.625*t_dic + t_no3 + 6.625*H2O + h3oplus -> t_don + 8.625*t_o2
p_no3_assim_spp_don (t_spp * lr_assim_spp_don*t_no3/(din+epsilon))*lim_t_dic_8*
= lim_t_no3_10
```

**respiration of POC [mol/kg/day]**

```
t_o2 + t_poc -> h2o + t_dic
p_poc_resp = (t_poc * r_poc_rec * exp(q10_det_rec * cgt_temp))*
lim_t_o2_0*lim_t_poc_12
```

**respiration of large-cell phytoplankton [mol/kg/day]**

```
0.8125*h3oplus + 6.625*t_o2 + t_lpp -> 7.4375*h2o + rfr_c*t_dic + rfr_p*t_po4 +
(1-don_fraction)*t_nh4 + don_fraction*t_don
p_lpp_resp_nh4 = (t_lpp*r_lpp_resp)*lim_t_o2_2*lim_t_lpp_15
```

**respiration of small-cell phytoplankton [mol/kg/day]**

```
t_spp + 6.625*t_o2 + 0.8125*h3oplus -> don_fraction*t_don + (1-don_fraction)*
t_nh4 + rfr_p*t_po4 + rfr_c*t_dic + 7.4375*h2o
p_spp_resp_nh4 = (t_spp*r_spp_resp)*lim_t_spp_16*lim_t_o2_2
```

**respiration of diazotroph cyanobacteria [mol/kg/day]**

```
t_cya + 6.625*t_o2 + 0.8125*h3oplus -> (1-don_fraction)*t_nh4 + don_fraction*
t_don + rfr_p*t_po4 + rfr_c*t_dic + 7.4375*h2o
```

continued on next page...

## Processes, continued from previous page

```
p_cya_resp_nh4 = (t_cya*r_cya_resp)*lim_t_cya_17*lim_t_o2_2
```

**mortality of large-cell phytoplankton [mol/kg/day]**

```
t_lpp -> t_det
```

```
p_lpp_mort_det = (t_lpp*r_pp_mort*(1+9*theta(5.0e-6-t_o2)))*lim_t_lpp_15
```

**mortality of small-scale phytoplankton [mol/kg/day]**

```
t_spp -> t_det
```

```
p_spp_mort_det = (t_spp*r_pp_mort*(1+9*theta(5.0e-6-t_o2)))*lim_t_spp_16
```

**mortality of diazotroph cyanobacteria [mol/kg/day]**

```
t_cya -> t_det
```

```
p_cya_mort_det = (t_cya*r_pp_mort*(1+9*theta(5.0e-6-t_o2)))*lim_t_cya_17
```

**mortality of diazotroph cyanobacteria due to strong turbulence [mol/kg/day]**

```
t_cya -> t_det
```

```
p_cya_mort_det_diff (t_cya*r_pp_mort*(r_cya_mort_diff*theta(cgt_diffusivity-  
= r_cya_mort_thresh)))*lim_t_cya_17
```

**respiration of DOC [mol/kg/day]**

```
t_doc + t_o2 -> t_dic + h2o
```

```
p_doc_resp = (t_doc * r_doc_rec * exp(q10_doc_rec * cgt_temp))*  
lim_t_o2_0*lim_t_doc_28
```

**assimilation of nitrate by large-cell phytoplankton; sub-process for atmos\_tot nitrogen [mol/kg/day]**

```
-> t_lpp_with_atmos_tot_N
```

```
p_no3_assim_lpp * ((1.0)*(1)*  
p_no3_assim_lpp_atmcmx(0.0,min(1.0,t_no3_with_atmos_tot_N/max(0.00000000001,t_no3)  
= ))) / ((1.0)*(1))
```

**assimilation of ammonium by large-cell phytoplankton; sub-process for atmos\_tot nitrogen [mol/kg/day]**

```
-> t_lpp_with_atmos_tot_N
```

```
p_nh4_assim_lpp * ((1.0)*(1)*  
p_nh4_assim_lpp_atmcmx(0.0,min(1.0,t_nh4_with_atmos_tot_N/max(0.00000000001,t_nh4)  
= ))) / ((1.0)*(1))
```

**assimilation of nitrate by small-cell phytoplankton; sub-process for atmos\_tot nitrogen [mol/kg/day]**

```
-> t_spp_with_atmos_tot_N
```

```
p_no3_assim_spp * ((1.0)*(1)*  
p_no3_assim_spp_atmcmx(0.0,min(1.0,t_no3_with_atmos_tot_N/max(0.00000000001,t_no3)  
= ))) / ((1.0)*(1))
```

continued on next page...

## Processes, continued from previous page

**assimilation of ammonium by small-cell phytoplankton; sub-process for atmos\_tot nitrogen [mol/kg/day]**

```
-> t_spp_with_atmos_tot_N
      p_nh4_assim_spp * ((1.0)*(1)*
p_nh4_assim_spp_atmcmax(0.0,min(1.0,t_nh4_with_atmos_tot_N/max(0.00000000001,t_nh4)
=      ))) / ((1.0)*(1))
```

**Production of DON by LPP; sub-process for atmos\_tot nitrogen [mol/kg/day]**

```
-> t_don_with_atmos_tot_N
      p_nh4_assim_lpp_don * ((1.0)*(1)*
p_nh4_assim_lpp_don_max(0.0,min(1.0,t_nh4_with_atmos_tot_N/max(0.00000000001,t_nh4)
=      ))) / ((1.0)*(1))
```

**Production of DON by LPP; sub-process for atmos\_tot nitrogen [mol/kg/day]**

```
-> t_don_with_atmos_tot_N
      p_no3_assim_lpp_don * ((1.0)*(1)*
p_no3_assim_lpp_don_max(0.0,min(1.0,t_no3_with_atmos_tot_N/max(0.00000000001,t_no3)
=      ))) / ((1.0)*(1))
```

**Production of DON by SPP; sub-process for atmos\_tot nitrogen [mol/kg/day]**

```
-> t_don_with_atmos_tot_N
      p_nh4_assim_spp_don * ((1.0)*(1)*
p_nh4_assim_spp_don_max(0.0,min(1.0,t_nh4_with_atmos_tot_N/max(0.00000000001,t_nh4)
=      ))) / ((1.0)*(1))
```

**Production of DON by SPP; sub-process for atmos\_tot nitrogen [mol/kg/day]**

```
-> t_don_with_atmos_tot_N
      p_no3_assim_spp_don * ((1.0)*(1)*
p_no3_assim_spp_don_max(0.0,min(1.0,t_no3_with_atmos_tot_N/max(0.00000000001,t_no3)
=      ))) / ((1.0)*(1))
```

**respiration of large-cell phytoplankton; sub-process for atmos\_tot nitrogen [mol/kg/day]**

```
-> don_fraction*t_don_with_atmos_tot_N + (1-don_fraction)*
t_nh4_with_atmos_tot_N
      p_lpp_resp_nh4 * ((1.0)*(1)*
p_lpp_resp_nh4_atmosmax(0.0,min(1.0,t_lpp_with_atmos_tot_N/max(0.00000000001,t_lpp)
=      ))) / ((1.0)*(1))
```

**respiration of small-cell phytoplankton; sub-process for atmos\_tot nitrogen [mol/kg/day]**

```
-> don_fraction*t_don_with_atmos_tot_N + (1-don_fraction)*
t_nh4_with_atmos_tot_N
```

continued on next page...

## Processes, continued from previous page

```

p_spp_resp_nh4 * ((1.0)*(1)*
p_spp_resp_nh4_atmosmax(0.0,min(1.0,t_spp_with_atmos_tot_N/max(0.00000000001,t_spp)
=
))) / ((1.0)*(1))

```

respiration of diazotroph cyanobacteria; sub-process for atmos\_tot nitrogen  
[mol/kg/day]

```

-> (1-don_fraction)*t_nh4_with_atmos_tot_N + don_fraction*
t_don_with_atmos_tot_N
p_cya_resp_nh4 * ((1.0)*(1)*
p_cya_resp_nh4_atmosmax(0.0,min(1.0,t_cya_with_atmos_tot_N/max(0.00000000001,t_cya)
=
))) / ((1.0)*(1))

```

mortality of large-cell phytoplankton; sub-process for atmos\_tot nitrogen  
[mol/kg/day]

```

-> t_det_with_atmos_tot_N
p_lpp_mort_det * ((1.0)*(1)*
p_lpp_mort_det_atmosmax(0.0,min(1.0,t_lpp_with_atmos_tot_N/max(0.00000000001,t_lpp)
=
))) / ((1.0)*(1))

```

mortality of small-scale phytoplankton; sub-process for atmos\_tot nitrogen  
[mol/kg/day]

```

-> t_det_with_atmos_tot_N
p_spp_mort_det * ((1.0)*(1)*
p_spp_mort_det_atmosmax(0.0,min(1.0,t_spp_with_atmos_tot_N/max(0.00000000001,t_spp)
=
))) / ((1.0)*(1))

```

mortality of diazotroph cyanobacteria; sub-process for atmos\_tot nitrogen  
[mol/kg/day]

```

-> t_det_with_atmos_tot_N
p_cya_mort_det * ((1.0)*(1)*
p_cya_mort_det_atmosmax(0.0,min(1.0,t_cya_with_atmos_tot_N/max(0.00000000001,t_cya)
=
))) / ((1.0)*(1))

```

mortality of diazotroph cyanobacteria due to strong turbulence; sub-process for  
atmos\_tot nitrogen [mol/kg/day]

```

-> t_det_with_atmos_tot_N
p_cya_mort_det_diff * ((1.0)*(1)*
p_cya_mort_det_diff_max(0.0,min(1.0,t_cya_with_atmos_tot_N/max(0.00000000001,t_cya)
=
))) / ((1.0)*(1))

```

assimilation of nitrate by large-cell phytoplankton; sub-process for atmos\_ship  
nitrogen [mol/kg/day]

```

-> t_lpp_with_atmos_ship_N
p_no3_assim_lpp * ((1.0)*(1)*
p_no3_assim_lpp_atmcmax(0.0,min(1.0,t_no3_with_atmos_ship_N/max(0.00000000001,t_no3)
=
))) / ((1.0)*(1))

```

continued on next page...



## Processes, continued from previous page

**assimilation of ammonium by large-cell phytoplankton; sub-process for  
atmos\_ship nitrogen [mol/kg/day]**

```
-> t_lpp_with_atmos_ship_N
      p_nh4_assim_lpp * ((1.0)*(1)*
p_nh4_assim_lpp_atmcmx(0.0,min(1.0,t_nh4_with_atmos_ship_N/max(0.00000000001,t_nh4)
=      ))) / ((1.0)*(1))
```

**assimilation of nitrate by small-cell phytoplankton; sub-process for atmos\_ship  
nitrogen [mol/kg/day]**

```
-> t_spp_with_atmos_ship_N
      p_no3_assim_spp * ((1.0)*(1)*
p_no3_assim_spp_atmcmx(0.0,min(1.0,t_no3_with_atmos_ship_N/max(0.00000000001,t_no3)
=      ))) / ((1.0)*(1))
```

**assimilation of ammonium by small-cell phytoplankton; sub-process for  
atmos\_ship nitrogen [mol/kg/day]**

```
-> t_spp_with_atmos_ship_N
      p_nh4_assim_spp * ((1.0)*(1)*
p_nh4_assim_spp_atmcmx(0.0,min(1.0,t_nh4_with_atmos_ship_N/max(0.00000000001,t_nh4)
=      ))) / ((1.0)*(1))
```

**Production of DON by LPP; sub-process for atmos\_ship nitrogen [mol/kg/day]**

```
-> t_don_with_atmos_ship_N
      p_nh4_assim_lpp_don * ((1.0)*(1)*
p_nh4_assim_lpp_don_max(0.0,min(1.0,t_nh4_with_atmos_ship_N/max(0.00000000001,t_nh4)
=      ))) / ((1.0)*(1))
```

**Production of DON by LPP; sub-process for atmos\_ship nitrogen [mol/kg/day]**

```
-> t_don_with_atmos_ship_N
      p_no3_assim_lpp_don * ((1.0)*(1)*
p_no3_assim_lpp_don_max(0.0,min(1.0,t_no3_with_atmos_ship_N/max(0.00000000001,t_no3)
=      ))) / ((1.0)*(1))
```

**Production of DON by SPP; sub-process for atmos\_ship nitrogen [mol/kg/day]**

```
-> t_don_with_atmos_ship_N
      p_nh4_assim_spp_don * ((1.0)*(1)*
p_nh4_assim_spp_don_max(0.0,min(1.0,t_nh4_with_atmos_ship_N/max(0.00000000001,t_nh4)
=      ))) / ((1.0)*(1))
```

**Production of DON by SPP; sub-process for atmos\_ship nitrogen [mol/kg/day]**

```
-> t_don_with_atmos_ship_N
      p_no3_assim_spp_don * ((1.0)*(1)*
p_no3_assim_spp_don_max(0.0,min(1.0,t_no3_with_atmos_ship_N/max(0.00000000001,t_no3)
=      ))) / ((1.0)*(1))
```

continued on next page...

## Processes, continued from previous page

**respiration of large-cell phytoplankton; sub-process for atmos\_ship nitrogen**  
[mol/kg/day]

```
-> don_fraction*t_don_with_atmos_ship_N + (1-don_fraction)*
t_nh4_with_atmos_ship_N
      p_lpp_resp_nh4 * ((1.0)*(1)*
p_lpp_resp_nh4_atmosmax(0.0,min(1.0,t_lpp_with_atmos_ship_N/max(0.00000000001,t_lpp)
=      ))) / ((1.0)*(1))
```

**respiration of small-cell phytoplankton; sub-process for atmos\_ship nitrogen**  
[mol/kg/day]

```
-> don_fraction*t_don_with_atmos_ship_N + (1-don_fraction)*
t_nh4_with_atmos_ship_N
      p_spp_resp_nh4 * ((1.0)*(1)*
p_spp_resp_nh4_atmosmax(0.0,min(1.0,t_spp_with_atmos_ship_N/max(0.00000000001,t_spp)
=      ))) / ((1.0)*(1))
```

**respiration of diazotroph cyanobacteria; sub-process for atmos\_ship nitrogen**  
[mol/kg/day]

```
-> (1-don_fraction)*t_nh4_with_atmos_ship_N + don_fraction*
t_don_with_atmos_ship_N
      p_cya_resp_nh4 * ((1.0)*(1)*
p_cya_resp_nh4_atmosmax(0.0,min(1.0,t_cya_with_atmos_ship_N/max(0.00000000001,t_cya)
=      ))) / ((1.0)*(1))
```

**mortality of large-cell phytoplankton; sub-process for atmos\_ship nitrogen**  
[mol/kg/day]

```
-> t_det_with_atmos_ship_N
      p_lpp_mort_det * ((1.0)*(1)*
p_lpp_mort_det_atmosmax(0.0,min(1.0,t_lpp_with_atmos_ship_N/max(0.00000000001,t_lpp)
=      ))) / ((1.0)*(1))
```

**mortality of small-scale phytoplankton; sub-process for atmos\_ship nitrogen**  
[mol/kg/day]

```
-> t_det_with_atmos_ship_N
      p_spp_mort_det * ((1.0)*(1)*
p_spp_mort_det_atmosmax(0.0,min(1.0,t_spp_with_atmos_ship_N/max(0.00000000001,t_spp)
=      ))) / ((1.0)*(1))
```

**mortality of diazotroph cyanobacteria; sub-process for atmos\_ship nitrogen**  
[mol/kg/day]

```
-> t_det_with_atmos_ship_N
      p_cya_mort_det * ((1.0)*(1)*
p_cya_mort_det_atmosmax(0.0,min(1.0,t_cya_with_atmos_ship_N/max(0.00000000001,t_cya)
=      ))) / ((1.0)*(1))
```

continued on next page...

## Processes, continued from previous page

mortality of diazotroph cyanobacteria due to strong turbulence; sub-process for  
atmos\_ship nitrogen [mol/kg/day]

```
-> t_det_with_atmos_ship_N
      p_cya_mort_det_diff * ((1.0)*(1)*
p_cya_mort_det_diff_max(0.0,min(1.0,t_cya_with_atmos_ship_N/max(0.00000000001,t_cya)
=      ))) / ((1.0)*(1))
```

## Auxiliary variables

square of positive temperature [ $^{\circ}\text{C} * ^{\circ}\text{C}$ ]

```
temp_sq =      max(0.0,cgt_temp)*max(0.0,cgt_temp)
```

dissolved inorganic nitrogen [mol/kg]

```
din =      t_no3+t_nh4
```

squared DIN [mol<sup>2</sup>/kg<sup>2</sup>]

```
din_sq =      din*din
```

squared phosphate [mol<sup>\*\*2</sup>/kg<sup>\*\*2</sup>]

```
po4_sq =      t_po4*t_po4
```

large-cell phytoplankton plus seed concentration [mol/kg]

```
lpp_plus_lpp0 =      t_lpp+lpp0
```

small-cell phytoplankton plus seed concentration [mol/kg]

```
spp_plus_spp0 =      t_spp+spp0
```

diazotroph cyanobacteria plus seed concentration [mol/kg]

```
cya_plus_cya0 =      t_cya+cya0
```

light limitation factor for large-cell phytoplankton growth [1]

```
temp1 =      max(cgt_light/2.0,light_opt_lpp)
lim_light_lpp =      cgt_light/temp1*exp(1-cgt_light/temp1)
```

light limitation factor for small-cell phytoplankton growth [1]

```
temp1 =      max(cgt_light/2.0,light_opt_spp)
lim_light_spp =      cgt_light/temp1*exp(1-cgt_light/temp1)
```

light limitation factor for diazotroph cyanobacteria growth [1]

```
temp1 =      max(cgt_light/2.0,light_opt_cya)
lim_light_cya =      cgt_light/temp1*exp(1-cgt_light/temp1)
```

growth rate of large-cell phytoplankton, limited by DIN, DIP, light and oxygen  
[1/day]

continued on next page...

### Auxiliary variables, continued from previous page

```
lr_assim_lpp = r_lpp_assim*theta(t_o2-2*t_h2s)*min(din_sq/(din_sq+
din_min_lpp*din_min_lpp),min(po4_sq/(po4_sq+din_min_lpp*
din_min_lpp*rfr_p*rfr_p),lim_light_lpp))
```

### production rate of DOC by LPP

```
lr_assim_lpp_doc = fac_doc_assim * r_lpp_assim * theta(t_o2-2*t_h2s) *
min(max(1 - din_sq/(din_sq+din_min_lpp*din_min_lpp),1 -
po4_sq/(din_min_lpp*din_min_lpp*rfr_p*rfr_p + po4_sq)),
lim_light_lpp)
```

### production rate of POC by SPP

```
lr_assim_spp_doc = fac_doc_assim * r_spp_assim * theta(t_o2-2*t_h2s) *
min(max(1 - din_sq/(din_sq+din_min_spp*din_min_spp),1 -
po4_sq/(din_min_spp*din_min_spp*rfr_p*rfr_p + po4_sq)),
lim_light_spp)*(1+temp_sq/(temp_sq+temp_min_spp*
temp_min_spp))
```

### production rate of POC by CYA

```
lr_assim_cya_doc = fac_doc_assim * r_cya_assim*theta(t_o2-2*t_h2s)*min(1 -
po4_sq/(po4_sq+dip_min_cya*dip_min_cya),lim_light_cya)*
(1/(1+exp(temp_min_cya-cgt_temp)))*(1/(1+exp(cgt_sali-
sali_max_cya)))*(1/(1+exp(sali_min_cya-cgt_sali)))
```

### growth rate of small-cell phytoplankton, limited by DIN, DIP, light, oxygen and temperature [1/day]

```
lr_assim_spp = r_spp_assim*theta(t_o2-2*t_h2s)*min(din_sq/(din_sq+
din_min_spp*din_min_spp),min(po4_sq/(po4_sq+din_min_spp*
din_min_spp*rfr_p*rfr_p),lim_light_spp))*(1+
temp_sq/(temp_sq+temp_min_spp*temp_min_spp))
```

### growth rate of diazotroph cyanobacteria, limited by DIP, light, oxygen, temperature and salinity [1/day]

```
lr_assim_cya = r_cya_assim*theta(t_o2-2*t_h2s)*min(po4_sq/(po4_sq+
dip_min_cya*dip_min_cya),lim_light_cya)*(1/(1+
exp(temp_min_cya-cgt_temp)))*(1/(1+exp(cgt_sali-
sali_max_cya)))*(1/(1+exp(sali_min_cya-cgt_sali)))
```

### production rate of POCP by LPP

```
lr_assim_lpp_dop = fac_dop_assim * r_lpp_assim * theta(t_o2-2*t_h2s) *
min(min(1 - din_sq/(din_sq+din_min_lpp*din_min_lpp)
,po4_sq/(din_min_lpp*din_min_lpp*rfr_p*rfr_p + po4_sq)),
lim_light_lpp)
```

continued on next page...

## Auxiliary variables, continued from previous page

**production rate of POCP by SPP**

```
lr_assim_spp_dop = fac_dop_assim * r_spp_assim * theta(t_o2-2*t_h2s) *
                  min(min(1 - din_sq/(din_sq+din_min_spp*din_min_spp)
                        ,po4_sq/(din_min_spp*din_min_spp*rfr_p*rfr_p + po4_sq)),
                  lim_light_spp)*(1+temp_sq/(temp_sq+temp_min_spp*
                  temp_min_spp))
```

**production rate of POCN by LPP**

```
lr_assim_lpp_don = fac_don_assim * r_lpp_assim * theta(t_o2-2*t_h2s) *
                  min(min(din_sq/(din_sq+din_min_lpp*din_min_lpp),1 -
                        po4_sq/(din_min_lpp*din_min_lpp*rfr_p*rfr_p + po4_sq)),
                  lim_light_lpp)
```

**production rate of POCN by SPP**

```
lr_assim_spp_don = fac_don_assim * r_spp_assim * theta(t_o2-2*t_h2s) *
                  min(min(din_sq/(din_sq+din_min_spp*din_min_spp),1 -
                        po4_sq/(din_min_spp*din_min_spp*rfr_p*rfr_p + po4_sq)),
                  lim_light_spp)*(1+temp_sq/(temp_sq+temp_min_spp*
                  temp_min_spp))
```

**Constants****seed concentration for diazotroph cyanobacteria [mol/kg]**

```
cya0 = 9.0E-8
```

**DIN half saturation constant for large-cell phytoplankton growth [mol/kg]**

```
din_min_lpp = 1.0E-6
```

**DIN half saturation constant for small-cell phytoplankton growth [mol/kg]**

```
din_min_spp = 1.6E-7
```

**DIP half saturation constant for diazotroph cyanobacteria growth [mol/kg]**

```
dip_min_cya = 1.0E-8
```

**no division by 0**

```
epsilon = 4.5E-17
```

**optimal light for diazotroph cyanobacteria growth [W/m\*\*2]**

```
light_opt_cya = 50.0
```

**optimal light for large-cell phytoplankton growth [W/m\*\*2]**

```
light_opt_lpp = 35.0
```

**optimal light for small-cell phytoplankton growth [W/m\*\*2]**

```
light_opt_spp = 50.0
```

continued on next page...

## Constants, continued from previous page

seed concentration for large-cell phytoplankton [mol/kg]

lpp0 = 4.5E-9

oxygen half-saturation constant for detritus recycling [mol/kg]

o2\_min\_det\_resp = 1.0E-6

q10 rule factor for recycling [1/K]

q10\_det\_rec = 0.15

q10 rule factor for DOC recycling [1/K]

q10\_doc\_rec = 0.069

maximum rate for nutrient uptake of diazotroph cyanobacteria [1/day]

r\_cya\_assim = 0.75

respiration rate of cyanobacteria to ammonium [1/day]

r\_cya\_resp = 0.01

maximum rate for nutrient uptake of large-cell phytoplankton [1/day]

r\_lpp\_assim = 1.38

respiration rate of large phytoplankton to ammonium [1/day]

r\_lpp\_resp = 0.075

mortality rate of phytoplankton [1/day]

r\_pp\_mort = 0.03

enhanced cya mortality due to strong turbulence

r\_cya\_mort\_diff = 40.0

diffusivity threshold for enhanced cyano mortality

r\_cya\_mort\_thresh = 0.02

maximum rate for nutrient uptake of small-cell phytoplankton [1/day]

r\_spp\_assim = 0.4

respiration rate of small phytoplankton to ammonium [1/day]

r\_spp\_resp = 0.0175

redfield ratio C/N

rfr\_c = 6.625

redfield ratio P/N

continued on next page...

| Constants, continued from previous page                         |                                |
|-----------------------------------------------------------------|--------------------------------|
| rfr_p =                                                         | 0.0625                         |
| <b>upper salinity limit - diazotroph cyanobacteria [psu]</b>    |                                |
| sali_max_cya =                                                  | 8.0                            |
| <b>lower salinity limit - diazotroph cyanobacteria [psu]</b>    |                                |
| sali_min_cya =                                                  | 4.0                            |
| <b>seed concentration for small-cell phytoplankton [mol/kg]</b> |                                |
| spp0 =                                                          | 4.5E-9                         |
| <b>lower temperature limit - diazotroph cyanobacteria [°C]</b>  |                                |
| temp_min_cya =                                                  | 13.5                           |
| <b>lower temperature limit - small-cell phytoplankton [°C]</b>  |                                |
| temp_min_spp =                                                  | 10.0                           |
| <b>fraction of DON in respiration products</b>                  |                                |
| don_fraction =                                                  | 0.0                            |
| <b>recycling rate (poc to dic) at 0°C [1/day]</b>               |                                |
| r_poc_rec =                                                     | 0.003                          |
| <b>factor modifying assimilation rate for POC production</b>    |                                |
| fac_doc_assim =                                                 | 1.0                            |
| <b>factor modifying assimilation rate for POCP production</b>   |                                |
| fac_dop_assim =                                                 | 0.5                            |
| <b>factor modifying assimilation rate for POCN production</b>   |                                |
| fac_don_assim =                                                 | 1.0                            |
| <b>recycling rate (doc to dic) at 0°C [1/day]</b>               |                                |
| r_doc_rec =                                                     | 0.001                          |
| Process limitation factors                                      |                                |
| lim_t_n2_7 =                                                    | theta(t_n2-0.0)                |
| lim_t_o2_0 =                                                    | 1.0-exp(-t_o2/o2_min_det_resp) |
| lim_t_o2_2 =                                                    | theta(t_o2-0.0)                |
| lim_t_dic_8 =                                                   | theta(t_dic-0.0)               |
| lim_t_nh4_11 =                                                  | theta(t_nh4-0.0)               |
| continued on next page...                                       |                                |

| Process limitation factors, continued from previous page |                  |
|----------------------------------------------------------|------------------|
| lim_t_no3_10 =                                           | theta(t_no3-0.0) |
| lim_t_po4_9 =                                            | theta(t_po4-0.0) |
| lim_t_spp_16 =                                           | theta(t_spp-0.0) |
| lim_t_doc_28 =                                           | theta(t_doc-0.0) |
| lim_t_lpp_15 =                                           | theta(t_lpp-0.0) |
| lim_t_cya_17 =                                           | theta(t_cya-0.0) |
| lim_t_poc_12 =                                           | theta(t_poc-0.0) |



### 3.6 Process type BGC/pelagic/reoxidation

| Processes                                                                                                                                                                                                                                                                                                                                          |
|----------------------------------------------------------------------------------------------------------------------------------------------------------------------------------------------------------------------------------------------------------------------------------------------------------------------------------------------------|
| <b>nitrification [mol/kg/day]</b><br>$\text{h2o} + 2*\text{t\_o2} + \text{t\_nh4} \rightarrow 2*\text{h3oplus} + \text{t\_no3}$<br>$\text{p\_nh4\_nit\_no3} = \frac{(\text{t\_nh4}*r\_nh4\_nitrif*\exp(q10\_nit*cgt\_temp))*\text{lim\_t\_o2\_2}}{\text{lim\_t\_nh4\_11}}$                                                                         |
| <b>oxidation of hydrogen sulfide with oxygen [mol/kg/day]</b><br>$\text{t\_h2s} + 0.5*\text{t\_o2} \rightarrow \text{t\_sul} + \text{h2o}$<br>$\text{p\_h2s\_oxo2\_sul} = \frac{(\text{t\_h2s}*\text{t\_o2}*k\_h2s\_o2*\exp(q10\_h2s*cgt\_temp))*\text{lim\_t\_h2s\_23}}{\text{lim\_t\_o2\_2}}$                                                    |
| <b>oxidation of hydrogen sulfide with nitrate [mol/kg/day]</b><br>$\text{t\_h2s} + 0.4*\text{t\_no3} + 0.4*\text{h3oplus} \rightarrow \text{t\_sul} + 1.6*\text{h2o} + 0.2*\text{t\_n2}$<br>$\text{p\_h2s\_oxno3\_sul} = \frac{(\text{t\_h2s}*\text{t\_no3}*k\_h2s\_no3*\exp(q10\_h2s*cgt\_temp))*\text{lim\_t\_h2s\_23}}{\text{lim\_t\_no3\_10}}$ |
| <b>oxidation of elemental sulfur with oxygen [mol/kg/day]</b><br>$3*\text{h2o} + 1.5*\text{t\_o2} + \text{t\_sul} \rightarrow 2*\text{h3oplus} + \text{so4}$<br>$\text{p\_sul\_oxo2\_so4} = \frac{(\text{t\_sul}*\text{t\_o2}*k\_sul\_o2*\exp(q10\_h2s*cgt\_temp))*\text{lim\_t\_o2\_2}}{\text{lim\_t\_sul\_24}}$                                  |
| <b>oxidation of elemental sulfur with nitrate [mol/kg/day]</b><br>$\text{t\_sul} + 1.2*\text{t\_no3} + 1.2*\text{h2o} \rightarrow \text{so4} + 0.8*\text{h3oplus} + 0.6*\text{t\_n2}$<br>$\text{p\_sul\_oxno3\_so4} = \frac{(\text{t\_sul}*\text{t\_no3}*k\_sul\_no3*\exp(q10\_h2s*cgt\_temp))*\text{lim\_t\_sul\_24}}{\text{lim\_t\_no3\_10}}$    |
| <b>nitrification; sub-process for atmos_tot nitrogen [mol/kg/day]</b><br>$\rightarrow \text{t\_no3\_with\_atmos\_tot\_N}$<br>$\text{p\_nh4\_nit\_no3} * ((1.0)*(1)*$<br>$\text{p\_nh4\_nit\_no3\_atmos\_max}(0.0,\text{min}(1.0,\text{t\_nh4\_with\_atmos\_tot\_N}/\text{max}(0.00000000001,\text{t\_nh4})) / ((1.0)*(1))$                         |
| <b>nitrification; sub-process for atmos_ship nitrogen [mol/kg/day]</b><br>$\rightarrow \text{t\_no3\_with\_atmos\_ship\_N}$<br>$\text{p\_nh4\_nit\_no3} * ((1.0)*(1)*$<br>$\text{p\_nh4\_nit\_no3\_atmos\_max}(0.0,\text{min}(1.0,\text{t\_nh4\_with\_atmos\_ship\_N}/\text{max}(0.00000000001,\text{t\_nh4})) / ((1.0)*(1))$                      |
| Auxiliary variables                                                                                                                                                                                                                                                                                                                                |
| Constants                                                                                                                                                                                                                                                                                                                                          |
| <b>reaction constant h2s oxidation with no3 [kg/mol/day]</b><br>$k\_h2s\_no3 = 800000.0$                                                                                                                                                                                                                                                           |
| <b>reaction constant h2s oxidation with o2 [kg/mol/day]</b><br>$k\_h2s\_o2 = 800000.0$                                                                                                                                                                                                                                                             |
| continued on next page...                                                                                                                                                                                                                                                                                                                          |

| Constants, continued from previous page |  |
|-----------------------------------------|--|
|-----------------------------------------|--|

|                                                       |  |
|-------------------------------------------------------|--|
| reaction constant sul oxidation with no3 [kg/mol/day] |  |
|-------------------------------------------------------|--|

|             |         |
|-------------|---------|
| k_sul_no3 = | 20000.0 |
|-------------|---------|

|                                                      |  |
|------------------------------------------------------|--|
| reaction constant sul oxidation with o2 [kg/mol/day] |  |
|------------------------------------------------------|--|

|            |         |
|------------|---------|
| k_sul_o2 = | 20000.0 |
|------------|---------|

|                                                    |  |
|----------------------------------------------------|--|
| q10 rule factor for oxidation of h2s and sul [1/K] |  |
|----------------------------------------------------|--|

|           |        |
|-----------|--------|
| q10_h2s = | 0.0693 |
|-----------|--------|

|                                         |  |
|-----------------------------------------|--|
| q10 rule factor for nitrification [1/K] |  |
|-----------------------------------------|--|

|           |      |
|-----------|------|
| q10_nit = | 0.11 |
|-----------|------|

|                                   |  |
|-----------------------------------|--|
| nitrification rate at 0°C [1/day] |  |
|-----------------------------------|--|

|                |      |
|----------------|------|
| r_nh4_nitrif = | 0.05 |
|----------------|------|

| Process limitation factors |  |
|----------------------------|--|
|----------------------------|--|

|              |                 |
|--------------|-----------------|
| lim_t_o2_2 = | theta(t_o2-0.0) |
|--------------|-----------------|

|                |                  |
|----------------|------------------|
| lim_t_nh4_11 = | theta(t_nh4-0.0) |
|----------------|------------------|

|                |                  |
|----------------|------------------|
| lim_t_no3_10 = | theta(t_no3-0.0) |
|----------------|------------------|

|                |                  |
|----------------|------------------|
| lim_t_h2s_23 = | theta(t_h2s-0.0) |
|----------------|------------------|

|                |                  |
|----------------|------------------|
| lim_t_sul_24 = | theta(t_sul-0.0) |
|----------------|------------------|

### 3.7 Process type BGC/pelagic/zooplankton

| Processes                                                                                                                                                                                                                                                                                                           |
|---------------------------------------------------------------------------------------------------------------------------------------------------------------------------------------------------------------------------------------------------------------------------------------------------------------------|
| <b>grazing of zooplankton eating large-cell phytoplankton [mol/kg/day]</b><br>$t_{lpp} \rightarrow t_{zoo}$<br>$p_{lpp\_graz\_zoo} = ((t_{zoo} + zoo0) * lr\_graz\_zoo * t_{lpp} / \max(food\_zoo, \epsilon)) * \lim\_t_{lpp\_15}$                                                                                  |
| <b>grazing of zooplankton eating small-cell phytoplankton [mol/kg/day]</b><br>$t_{spp} \rightarrow t_{zoo}$<br>$p_{spp\_graz\_zoo} = ((t_{zoo} + zoo0) * lr\_graz\_zoo * t_{spp} / \max(food\_zoo, \epsilon)) * \lim\_t_{spp\_16}$                                                                                  |
| <b>grazing of zooplankton eating diazotroph cyanobacteria [mol/kg/day]</b><br>$t_{cya} \rightarrow t_{zoo}$<br>$p_{cya\_graz\_zoo} = ((t_{zoo} + zoo0) * lr\_graz\_zoo * (0.5 * t_{cya}) / \max(food\_zoo, \epsilon)) * \lim\_t_{cya\_17}$                                                                          |
| <b>respiration of zooplankton [mol/kg/day]</b><br>$t_{zoo} + 6.625 * t_{o2} + 0.8125 * h3oplus \rightarrow don\_fraction * t_{don} + (1 - don\_fraction) * t_{nh4} + rfr\_p * t_{po4} + rfr\_c * t_{dic} + 7.4375 * h2o$<br>$p_{zoo\_resp\_nh4} = (zoo\_eff * r_{zoo\_resp}) * \lim\_t_{zoo\_18} * \lim\_t_{o2\_2}$ |
| <b>mortality of zooplankton [mol/kg/day]</b><br>$t_{zoo} \rightarrow t_{det}$<br>$p_{zoo\_mort\_det} = (zoo\_eff * r_{zoo\_mort} * (1 + 9 * \theta(5.0e-6 - t_{o2}))) * \lim\_t_{zoo\_18}$                                                                                                                          |
| <b>grazing of zooplankton eating large-cell phytoplankton; sub-process for atmos_tot nitrogen [mol/kg/day]</b><br>$\rightarrow t_{zoo\_with\_atmos\_tot\_N}$<br>$p_{lpp\_graz\_zoo} * ((1.0) * (1) * \max(0.0, \min(1.0, t_{lpp\_with\_atmos\_tot\_N} / \max(0.00000000001, t_{lpp}))) / ((1.0) * (1))$             |
| <b>grazing of zooplankton eating small-cell phytoplankton; sub-process for atmos_tot nitrogen [mol/kg/day]</b><br>$\rightarrow t_{zoo\_with\_atmos\_tot\_N}$<br>$p_{spp\_graz\_zoo} * ((1.0) * (1) * \max(0.0, \min(1.0, t_{spp\_with\_atmos\_tot\_N} / \max(0.00000000001, t_{spp}))) / ((1.0) * (1))$             |
| <b>grazing of zooplankton eating diazotroph cyanobacteria; sub-process for atmos_tot nitrogen [mol/kg/day]</b><br>$\rightarrow t_{zoo\_with\_atmos\_tot\_N}$<br>$p_{cya\_graz\_zoo} * ((1.0) * (1) * \max(0.0, \min(1.0, t_{cya\_with\_atmos\_tot\_N} / \max(0.00000000001, t_{cya}))) / ((1.0) * (1))$             |
| continued on next page...                                                                                                                                                                                                                                                                                           |

## Processes, continued from previous page

**respiration of zooplankton; sub-process for atmos\_tot nitrogen [mol/kg/day]**

```
-> don_fraction*t_don_with_atmos_tot_N + (1-don_fraction)*
t_nh4_with_atmos_tot_N
      p_zoo_resp_nh4 * ((1.0)*(1)*
p_zoo_resp_nh4_atmosmax(0.0,min(1.0,t_zoo_with_atmos_tot_N/max(0.00000000001,t_zoo)
=      ))) / ((1.0)*(1))
```

**mortality of zooplankton; sub-process for atmos\_tot nitrogen [mol/kg/day]**

```
-> t_det_with_atmos_tot_N
      p_zoo_mort_det * ((1.0)*(1)*
p_zoo_mort_det_atmosmax(0.0,min(1.0,t_zoo_with_atmos_tot_N/max(0.00000000001,t_zoo)
=      ))) / ((1.0)*(1))
```

**grazing of zooplankton eating large-cell phytoplankton; sub-process for atmos\_ship nitrogen [mol/kg/day]**

```
-> t_zoo_with_atmos_ship_N
      p_lpp_graz_zoo * ((1.0)*(1)*
p_lpp_graz_zoo_atmosmax(0.0,min(1.0,t_lpp_with_atmos_ship_N/max(0.00000000001,t_lpp)
=      ))) / ((1.0)*(1))
```

**grazing of zooplankton eating small-cell phytoplankton; sub-process for atmos\_ship nitrogen [mol/kg/day]**

```
-> t_zoo_with_atmos_ship_N
      p_spp_graz_zoo * ((1.0)*(1)*
p_spp_graz_zoo_atmosmax(0.0,min(1.0,t_spp_with_atmos_ship_N/max(0.00000000001,t_spp)
=      ))) / ((1.0)*(1))
```

**grazing of zooplankton eating diazotroph cyanobacteria; sub-process for atmos\_ship nitrogen [mol/kg/day]**

```
-> t_zoo_with_atmos_ship_N
      p_cya_graz_zoo * ((1.0)*(1)*
p_cya_graz_zoo_atmosmax(0.0,min(1.0,t_cya_with_atmos_ship_N/max(0.00000000001,t_cya)
=      ))) / ((1.0)*(1))
```

**respiration of zooplankton; sub-process for atmos\_ship nitrogen [mol/kg/day]**

```
-> don_fraction*t_don_with_atmos_ship_N + (1-don_fraction)*
t_nh4_with_atmos_ship_N
      p_zoo_resp_nh4 * ((1.0)*(1)*
p_zoo_resp_nh4_atmosmax(0.0,min(1.0,t_zoo_with_atmos_ship_N/max(0.00000000001,t_zoo)
=      ))) / ((1.0)*(1))
```

**mortality of zooplankton; sub-process for atmos\_ship nitrogen [mol/kg/day]**

```
-> t_det_with_atmos_ship_N
```

continued on next page...

| Processes, continued from previous page                                                                                                                                                     |                                                                                                                                                                                                                                                                                                 |
|---------------------------------------------------------------------------------------------------------------------------------------------------------------------------------------------|-------------------------------------------------------------------------------------------------------------------------------------------------------------------------------------------------------------------------------------------------------------------------------------------------|
| $\text{p\_zoo\_mort\_det} * ((1.0)*(1)*$ $\text{p\_zoo\_mort\_det\_atmosmax}(0.0,\text{min}(1.0,\text{t\_zoo\_with\_atmos\_ship\_N}/\text{max}(0.00000000001,\text{t\_zoo})) / ((1.0)*(1))$ |                                                                                                                                                                                                                                                                                                 |
| Auxiliary variables                                                                                                                                                                         |                                                                                                                                                                                                                                                                                                 |
| square of positive temperature [ $^{\circ}\text{C} * ^{\circ}\text{C}$ ]                                                                                                                    |                                                                                                                                                                                                                                                                                                 |
| temp_sq =                                                                                                                                                                                   | max(0.0,cgt_temp)*max(0.0,cgt_temp)                                                                                                                                                                                                                                                             |
| effectice zooplankton concentration assumed for mortality and respiration process [mol/kg]                                                                                                  |                                                                                                                                                                                                                                                                                                 |
| zoo_eff =                                                                                                                                                                                   | t_zoo*t_zoo/zoo_cl                                                                                                                                                                                                                                                                              |
| suitable food for zooplankton (weighted with food preferences) [mol/kg]                                                                                                                     |                                                                                                                                                                                                                                                                                                 |
| food_zoo =                                                                                                                                                                                  | t_lpp+t_spp+0.5*t_cya                                                                                                                                                                                                                                                                           |
| growth rate of zooplankton, limited by food, oxygen and temperature [1/day]                                                                                                                 |                                                                                                                                                                                                                                                                                                 |
| lr_graz_zoo =                                                                                                                                                                               | $\text{r\_zoo\_graz}*(1-\exp(-\text{food\_zoo}*\text{food\_zoo}/(\text{food\_min\_zoo}*$ $\text{food\_min\_zoo}))) * \text{theta}(\text{t\_o2}-2*\text{t\_h2s})*(1.0+$ $\text{temp\_sq}/(\text{temp\_opt\_zoo}*\text{temp\_opt\_zoo})*\exp(2.0-\text{cgt\_temp}*$ $2.0/\text{temp\_opt\_zoo}))$ |
| Constants                                                                                                                                                                                   |                                                                                                                                                                                                                                                                                                 |
| no division by 0                                                                                                                                                                            |                                                                                                                                                                                                                                                                                                 |
| epsilon =                                                                                                                                                                                   | 4.5E-17                                                                                                                                                                                                                                                                                         |
| Ivlev phytoplankton concentration for zooplankton grazing [mol/kg]                                                                                                                          |                                                                                                                                                                                                                                                                                                 |
| food_min_zoo =                                                                                                                                                                              | 4.108E-6                                                                                                                                                                                                                                                                                        |
| maximum zooplankton grazing rate [1/day]                                                                                                                                                    |                                                                                                                                                                                                                                                                                                 |
| r_zoo_graz =                                                                                                                                                                                | 0.5                                                                                                                                                                                                                                                                                             |
| mortality rate of zooplankton [1/day]                                                                                                                                                       |                                                                                                                                                                                                                                                                                                 |
| r_zoo_mort =                                                                                                                                                                                | 0.03                                                                                                                                                                                                                                                                                            |
| respiration rate of zooplankton [1/day]                                                                                                                                                     |                                                                                                                                                                                                                                                                                                 |
| r_zoo_resp =                                                                                                                                                                                | 0.01                                                                                                                                                                                                                                                                                            |
| redfield ratio C/N                                                                                                                                                                          |                                                                                                                                                                                                                                                                                                 |
| rfr_c =                                                                                                                                                                                     | 6.625                                                                                                                                                                                                                                                                                           |
| redfield ratio P/N                                                                                                                                                                          |                                                                                                                                                                                                                                                                                                 |
| rfr_p =                                                                                                                                                                                     | 0.0625                                                                                                                                                                                                                                                                                          |
| optimal temperature for zooplankton grazing [ $^{\circ}\text{C}$ ]                                                                                                                          |                                                                                                                                                                                                                                                                                                 |
| continued on next page...                                                                                                                                                                   |                                                                                                                                                                                                                                                                                                 |

| Constants, continued from previous page     |                  |
|---------------------------------------------|------------------|
| temp_opt_zoo =                              | 20.0             |
| seed concentration for zooplankton [mol/kg] |                  |
| zoo0 =                                      | 4.5E-9           |
| zooplankton closure parameter [mol/kg]      |                  |
| zoo_cl =                                    | 9.0E-8           |
| fraction of DON in respiration products     |                  |
| don_fraction =                              | 0.0              |
| Process limitation factors                  |                  |
| lim_t_o2_2 =                                | theta(t_o2-0.0)  |
| lim_t_spp_16 =                              | theta(t_spp-0.0) |
| lim_t_zoo_18 =                              | theta(t_zoo-0.0) |
| lim_t_lpp_15 =                              | theta(t_lpp-0.0) |
| lim_t_cya_17 =                              | theta(t_cya-0.0) |

### 3.8 Process type gas\_exchange

| Processes                                                                              |                                                                                                                                                                                                                                                                                             |
|----------------------------------------------------------------------------------------|---------------------------------------------------------------------------------------------------------------------------------------------------------------------------------------------------------------------------------------------------------------------------------------------|
| Auxiliary variables                                                                    |                                                                                                                                                                                                                                                                                             |
| <b>absolute temperature [K]</b>                                                        |                                                                                                                                                                                                                                                                                             |
| temp_k =                                                                               | cgt_temp + 273.15                                                                                                                                                                                                                                                                           |
| <b>temporary value assumed for pH [1]</b>                                              |                                                                                                                                                                                                                                                                                             |
| ph_temp =                                                                              | 0.0-log(h3o)/log(10.0)                                                                                                                                                                                                                                                                      |
| calculated iteratively, 10 iterations, initial value = 0.0                             |                                                                                                                                                                                                                                                                                             |
| <b>self-ionization constant of Water [mol<sup>2</sup>/kg<sup>2</sup>]</b>              |                                                                                                                                                                                                                                                                                             |
| k_water =                                                                              | exp( -13847.26 / temp_k + 148.96502 - 23.6521 * log(temp_k) + (118.67/temp_k - 5.977 + 1.0495 * log(temp_k)) * sqrt(cgt_sali) - 0.01615 * cgt_sali)                                                                                                                                         |
| <b>Solubility of CO2 [mol/kg/Pa]</b>                                                   |                                                                                                                                                                                                                                                                                             |
| k0_co2 =                                                                               | exp(9345.17 / temp_k - 60.2409 + 23.3585 * (log(temp_k) - 4.605170186) + cgt_sali*(0.023517 - 0.00023656 * temp_k + 0.00000047036 *temp_k*temp_k))/101325.0                                                                                                                                 |
| <b>Acid dissociation constant CO2 + 2 H2O &lt;-&gt; HCO3- + H3O+ [mol/kg]</b>          |                                                                                                                                                                                                                                                                                             |
| k1_co2 =                                                                               | power(10.0,( -3633.86 / temp_k + 61.2172 - 9.6777 * log(temp_k) + 0.011555 * cgt_sali - 0.0001152 * cgt_sali * cgt_sali))                                                                                                                                                                   |
| <b>Acid dissociation constant HCO3- + H2O &lt;-&gt; [CO3 2-] + H3O+ [mol/kg]</b>       |                                                                                                                                                                                                                                                                                             |
| k2_co2 =                                                                               | power(10.0,( -471.78 / temp_k - 25.929 + 3.16967 * log(temp_k) + 0.01781 * cgt_sali - 0.0001122 * cgt_sali * cgt_sali))                                                                                                                                                                     |
| <b>Acid dissociation constant of boric acid [mol/kg]</b>                               |                                                                                                                                                                                                                                                                                             |
| k_boron =                                                                              | exp(( -8966.9 - 2890.53*sqrt(cgt_sali) - 77.942*cgt_sali + 1.728*cgt_sali*sqrt(cgt_sali) - 0.0996*cgt_sali*cgt_sali) / temp_k + 148.0248 + 137.1942*sqrt(cgt_sali) + 1.62142*cgt_sali + (-24.4344 - 25.085*sqrt(cgt_sali) - 0.2474*cgt_sali)*log(temp_k) + 0.053105*sqrt(cgt_sali)*temp_k ) |
| <b>Acid dissociation constant H3PO4 + H2O &lt;-&gt; [H2PO4 -] + H3O+ [mol/kg]</b>      |                                                                                                                                                                                                                                                                                             |
| k1_po4 =                                                                               | exp( -4576.752/temp_k + 115.525 - 18.453*log(temp_k) + (0.69171 - 106.736/temp_k)*sqrt(cgt_sali) - (0.01844 + 0.65643/temp_k)*cgt_sali )                                                                                                                                                    |
| <b>Acid dissociation constant [H2PO4 -] + H2O+ &lt;-&gt; [HPO4 2-] + H3O+ [mol/kg]</b> |                                                                                                                                                                                                                                                                                             |
| k2_po4 =                                                                               | exp( -8814.715/temp_k + 172.0883 - 27.927*log(temp_k) + (1.35660 - 160.340/temp_k)*sqrt(cgt_sali) - (0.05778 - 0.37335/temp_k)*cgt_sali )                                                                                                                                                   |
| continued on next page...                                                              |                                                                                                                                                                                                                                                                                             |

### Auxiliary variables, continued from previous page

**Acid dissociation constant  $[\text{HPO}_4^{2-}] + \text{H}_2\text{O} \rightleftharpoons [\text{PO}_4^{3-}] + \text{H}_3\text{O}^+$  [mol/kg]**

$k_{3\_po4} = \exp(-3070.75/\text{temp\_k} - 18.141 + (2.81197 + 17.27039/\text{temp\_k}) \cdot \sqrt{\text{cgt\_sali}} - (0.09984 + 44.99486/\text{temp\_k}) \cdot \text{cgt\_sali})$

**Acid dissociation constant  $\text{H}_2\text{S} + \text{H}_2\text{O} \rightleftharpoons \text{HS}^- + \text{H}_3\text{O}^+$  [mol/kg]**

$k_{1\_h2s} = \exp(-3131.42/\text{temp\_k} + 5.818 + 0.368 \cdot (\text{power}(\max(0.0, \text{cgt\_sali}), (1.0/3.0))))$

**total concentration of boron [mol/kg]**

$\text{boron\_total} = 0.000416 \cdot \text{cgt\_sali}/35.0$

**boron alkalinity [mol/kg]**

$\text{alk\_boron} = \text{boron\_total} \cdot k_{\text{boron}} / (k_{\text{boron}} + h_{3o})$

calculated iteratively, 10 iterations, initial value = 0.0

**hydrogen sulfide alkalinity [mol/kg]**

$\text{alk\_h2s} = t_{h2s} \cdot k_{1\_h2s} / (k_{1\_h2s} + h_{3o})$

calculated iteratively, 10 iterations, initial value = 0.0

**water alkalinity [mol/kg]**

$\text{alk\_water} = k_{\text{water}} / h_{3o} - h_{3o}$

calculated iteratively, 10 iterations, initial value = 0.0

**denominator in phosphate alkalinity formula [mol<sup>3</sup>/kg<sup>3</sup>]**

$\text{alk\_po4\_denominator} = (h_{3o} \cdot h_{3o} \cdot h_{3o} + k_{1\_po4} \cdot h_{3o} \cdot h_{3o} + k_{1\_po4} \cdot k_{2\_po4} \cdot h_{3o} + k_{1\_po4} \cdot k_{2\_po4} \cdot k_{3\_po4})$

calculated iteratively, 10 iterations, initial value = 0.0

**phosphate alkalinity [mol/kg]**

$\text{alk\_po4} = (t_{po4} \cdot (k_{1\_po4} \cdot k_{2\_po4} \cdot h_{3o} + 2.0 \cdot k_{1\_po4} \cdot k_{2\_po4} \cdot k_{3\_po4} - h_{3o} \cdot h_{3o} \cdot h_{3o})) / \text{alk\_po4\_denominator}$

calculated iteratively, 10 iterations, initial value = 0.0

**denominator in carbonate alkalinity formula [mol<sup>2</sup>/kg<sup>2</sup>]**

$\text{alk\_co2\_denominator} = (h_{3o} \cdot h_{3o} + k_{1\_co2} \cdot h_{3o} + k_{1\_co2} \cdot k_{2\_co2})$

calculated iteratively, 10 iterations, initial value = 0.0

**carbonate alkalinity [mol/kg]**

$\text{alk\_co2} = t_{dic} \cdot k_{1\_co2} \cdot (h_{3o} + 2 \cdot k_{2\_co2}) / \text{alk\_co2\_denominator}$

calculated iteratively, 10 iterations, initial value = 0.0

**error in total alkalinity calculation at the assumed pH [mol/kg]**

continued on next page...



### Auxiliary variables, continued from previous page

**alk\_residual =**  $t_{\text{alk}} - \text{alk\_co2} - \text{alk\_po4} - \text{alk\_boron} - \text{alk\_h2s} - \text{alk\_water}$   
calculated iteratively, 10 iterations, initial value = 0.0

### derivative of phosphate alkalinity with respect to h3o [1]

**dalkp\_dh3o =**  $t_{\text{po4}} * (0.0 - k1_{\text{po4}} * h3o * h3o * h3o * h3o - 4 * k1_{\text{po4}} * k2_{\text{po4}} * h3o * h3o * h3o - (k1_{\text{po4}} * k1_{\text{po4}} * k2_{\text{po4}} + 9 * k1_{\text{po4}} * k2_{\text{po4}} * k3_{\text{po4}}) * h3o * h3o - 4 * k1_{\text{po4}} * k1_{\text{po4}} * k2_{\text{po4}} * k3_{\text{po4}} * h3o - k1_{\text{po4}} * k1_{\text{po4}} * k2_{\text{po4}} * k2_{\text{po4}} * k3_{\text{po4}}) / (\text{alk\_po4\_denominator} * \text{alk\_po4\_denominator})$   
calculated iteratively, 10 iterations, initial value = 0.0

### derivative of carbonate alkalinity with respect to h3o [1]

**dalkc\_dh3o =**  $t_{\text{dic}} * (0.0 - k1_{\text{co2}} * h3o * h3o - k1_{\text{co2}} * k1_{\text{co2}} * k2_{\text{co2}} - 4 * k1_{\text{co2}} * k2_{\text{co2}} * h3o) / (\text{alk\_co2\_denominator} * \text{alk\_co2\_denominator})$   
calculated iteratively, 10 iterations, initial value = 0.0

### derivative of residual\_alk with respect to pH [mol/kg]

**dalkresidual\_dpH =**  $0.0 - \log(10.0) * h3o * (\text{alk\_boron} / (k_{\text{boron}} + h3o) + \text{alk\_h2s} / (k1_{\text{h2s}} + h3o) + k_{\text{water}} / (h3o * h3o) + 1 - \text{dalkp\_dh3o} - \text{dalkc\_dh3o})$   
calculated iteratively, 10 iterations, initial value = 0.0

### newly determined pH value [1]

**temp1 =**  $\text{alk\_residual} / \text{dalkresidual\_dpH}$   
**ph =**  $\text{ph\_temp} - \text{temp1} + \theta(\text{abs}(\text{temp1}) - 1) * 0.5 * \text{temp1}$   
calculated iteratively, 10 iterations, initial value = 0.0

### h3o ion concentration [mol/kg]

**h3o =**  $\text{power}(10.0, 0.0 - \max(1.0, \min(13.0, \text{ph})))$   
calculated iteratively, 10 iterations, initial value = 1.0e-8

### co2 partial pressure [Pa]

**pco2 =**  $t_{\text{dic}} / k0_{\text{co2}} / (1 + k1_{\text{co2}} / h3o + k1_{\text{co2}} * k2_{\text{co2}} / h3o / h3o)$

### oxygen saturation concentration [mol/kg]

**o2\_sat =**  $(10.18e0 + ((5.306e-3 - 4.8725e-5 * \text{cgt\_temp}) * \text{cgt\_temp} - 0.2785e0) * \text{cgt\_temp} + \text{cgt\_sali} * ((2.2258e-3 + (4.39e-7 * \text{cgt\_temp} - 4.645e-5) * \text{cgt\_temp}) * \text{cgt\_temp} - 6.33e-2)) * 44.66e0 * 1e-6)$

### dissolved molecular nitrogen saturation concentration [mol/kg]

**temp1 =**  $\log((298.15 - \text{cgt\_temp}) / (273.15 + \text{cgt\_temp}))$   
**temp2 =**  $\text{temp1} * \text{temp1}$   
**temp3 =**  $\text{temp2} * \text{temp1}$   
**n2\_sat =**  $1e-6 * \exp(6.42931 + 2.92704 * \text{temp1} + 4.32531 * \text{temp2} + 4.69149 * \text{temp3} + \text{cgt\_sali} * (0.0 - 7.44129e-3 - 8.02566e-3 * \text{temp1} - 1.46775e-2 * \text{temp2}))$

continued on next page...

|                                                   |
|---------------------------------------------------|
| Auxiliary variables, continued from previous page |
|---------------------------------------------------|

|           |
|-----------|
| Constants |
|-----------|

|                                          |
|------------------------------------------|
| atmospheric partial pressure of CO2 [Pa] |
|------------------------------------------|

|                 |
|-----------------|
| patm_co2 = 38.0 |
|-----------------|

|                                            |
|--------------------------------------------|
| piston velocity for co2 surface flux [m/d] |
|--------------------------------------------|

|                 |
|-----------------|
| w_co2_stf = 4.0 |
|-----------------|

|                                           |
|-------------------------------------------|
| piston velocity for n2 surface flux [m/d] |
|-------------------------------------------|

|                |
|----------------|
| w_n2_stf = 5.0 |
|----------------|

|                                               |
|-----------------------------------------------|
| piston velocity for oxygen surface flux [m/d] |
|-----------------------------------------------|

|                |
|----------------|
| w_o2_stf = 5.0 |
|----------------|

|                            |
|----------------------------|
| Process limitation factors |
|----------------------------|

|                              |
|------------------------------|
| lim_t_n2_7 = theta(t_n2-0.0) |
|------------------------------|

|                              |
|------------------------------|
| lim_t_o2_2 = theta(t_o2-0.0) |
|------------------------------|

|                                |
|--------------------------------|
| lim_t_dic_8 = theta(t_dic-0.0) |
|--------------------------------|

### 3.9 Process type physics/erosion

| Processes                                                                                                                                                                                                                                                                                                                                                 |
|-----------------------------------------------------------------------------------------------------------------------------------------------------------------------------------------------------------------------------------------------------------------------------------------------------------------------------------------------------------|
| <b>sedimentary detritus erosion (sediment only) [mol/m<sup>2</sup>/day]</b><br><code>t_sed -&gt; t_det</code><br><code>p_sed_ero_det = (erosion_is_active*r_sed_ero*sed_active)*lim_t_sed_20</code>                                                                                                                                                       |
| <b>erosion of iron PO4 (sediment only) [mol/m<sup>2</sup>/day]</b><br><code>t_ips -&gt; t_ipw</code><br><code>p_ips_ero_ipw = (erosion_is_active*r_ips_ero*t_ips)*lim_t_ips_22</code>                                                                                                                                                                     |
| <b>sedimentary poc erosion (sediment only) [mol/m<sup>2</sup>/day]</b><br><code>t_sed_poc -&gt; t_poc</code><br><code>p_sed_ero_poc = (erosion_is_active*r_sed_ero*poc_active)*lim_t_sed_poc_21</code>                                                                                                                                                    |
| <b>sedimentary pocn erosion (sediment only) [mol/m<sup>2</sup>/day]</b><br><code>t_sed_pocn -&gt; t_pocn</code><br><code>p_sed_ero_pocn = (erosion_is_active*r_sed_ero*pocn_active)*lim_t_sed_pocn_26</code>                                                                                                                                              |
| <b>sedimentary pocp erosion (sediment only) [mol/m<sup>2</sup>/day]</b><br><code>t_sed_pocp -&gt; t_pocp</code><br><code>p_sed_ero_pocp = (erosion_is_active*r_sed_ero*pocp_active)*lim_t_sed_pocp_27</code>                                                                                                                                              |
| <b>sedimentary detritus erosion; sub-process for atmos_tot nitrogen (sediment only) [mol/m<sup>2</sup>/day]</b><br><code>-&gt; t_det_with_atmos_tot_N</code><br><code>p_sed_ero_det * ((1.0)*(1)*</code><br><code>p_sed_ero_det_atmos_max(0.0,min(1.0,t_sed_with_atmos_tot_N/max(0.00000000001,t_sed)</code><br><code>= ))) / ((1.0)*(1))</code>          |
| <b>sedimentary pocn erosion; sub-process for atmos_tot nitrogen (sediment only) [mol/m<sup>2</sup>/day]</b><br><code>-&gt; t_pocn_with_atmos_tot_N</code><br><code>p_sed_ero_pocn * ((1.0)*(1)*</code><br><code>p_sed_ero_pocn_atmos_max(0.0,min(1.0,t_sed_pocn_with_atmos_tot_N/max(0.00000000001,t_sed_pocn)</code><br><code>= ))) / ((1.0)*(1))</code> |
| <b>sedimentary detritus erosion; sub-process for atmos_ship nitrogen (sediment only) [mol/m<sup>2</sup>/day]</b><br><code>-&gt; t_det_with_atmos_ship_N</code><br><code>p_sed_ero_det * ((1.0)*(1)*</code><br><code>p_sed_ero_det_atmos_max(0.0,min(1.0,t_sed_with_atmos_ship_N/max(0.00000000001,t_sed)</code><br><code>= ))) / ((1.0)*(1))</code>       |
| continued on next page...                                                                                                                                                                                                                                                                                                                                 |

## Processes, continued from previous page

sedimentary pocn erosion; sub-process for atmos\_ship nitrogen (sediment only)  
[mol/m<sup>2</sup>/day]

```
-> t_pocn_with_atmos_ship_N
      p_sed_ero_pocn * ((1.0)*(1)*
p_sed_ero_pocn_atmosmax(0.0,min(1.0,t_sed_pocn_with_atmos_ship_N/max(0.00000000001,t_sed_pocn.
=      ))) / ((1.0)*(1))
```

## Auxiliary variables

total carbon in sediment layer [mol/m\*\*2]

```
sed_tot =      t_sed*rfr_c + t_sed_poc + t_sed_pocn*rfr_c + t_sed_pocp*
              rfr_cp
```

total carbon in active sediment layer [mol/m\*\*2]

```
sed_tot_active =      max(0.0,min(sed_tot,sed_max*rfr_c))
```

detritus in active sediment layer [mol/m\*\*2]

```
sed_active =      sed_tot_active * t_sed/sed_tot
```

switch (1=erosion, 0=no erosion) which depends on the combined bottom stress  
of currents and waves

```
erosion_is_active = theta(cgt_current_wave_stress - critical_stress)
```

poc in active sediment layer [mol/m\*\*2]

```
poc_active =      sed_tot_active * t_sed_poc/sed_tot
```

pocn in active sediment layer [mol/m\*\*2]

```
pocn_active =      sed_tot_active * t_sed_pocn/sed_tot
```

pocp in active sediment layer [mol/m\*\*2]

```
pocp_active =      sed_tot_active * t_sed_pocp/sed_tot
```

## Constants

critical shear stress for sediment erosion [N/m2]

```
critical_stress =      0.016
```

erosion rate for iron PO4 [1/day]

```
r_ips_ero =      6.0
```

maximum sediment detritus erosion rate [1/day]

```
r_sed_ero =      6.0
```

redfield ratio C/N

```
rfr_c =      6.625
```

continued on next page...

| Constants, continued from previous page |  |
|-----------------------------------------|--|
|-----------------------------------------|--|

|                           |  |
|---------------------------|--|
| <b>redfield ratio C/P</b> |  |
|---------------------------|--|

|          |       |
|----------|-------|
| rfr_cp = | 106.0 |
|----------|-------|

|                                                                              |  |
|------------------------------------------------------------------------------|--|
| <b>maximum sediment detritus concentration that feels erosion [mol/m**2]</b> |  |
|------------------------------------------------------------------------------|--|

|           |     |
|-----------|-----|
| sed_max = | 1.0 |
|-----------|-----|

| Process limitation factors |  |
|----------------------------|--|
|----------------------------|--|

|                |                  |
|----------------|------------------|
| lim_t_sed_20 = | theta(t_sed-0.0) |
|----------------|------------------|

|                |                  |
|----------------|------------------|
| lim_t_ips_22 = | theta(t_ips-0.0) |
|----------------|------------------|

|                    |                      |
|--------------------|----------------------|
| lim_t_sed_poc_21 = | theta(t_sed_poc-0.0) |
|--------------------|----------------------|

|                     |                       |
|---------------------|-----------------------|
| lim_t_sed_pocn_26 = | theta(t_sed_pocn-0.0) |
|---------------------|-----------------------|

|                     |                       |
|---------------------|-----------------------|
| lim_t_sed_pocp_27 = | theta(t_sed_pocp-0.0) |
|---------------------|-----------------------|

### 3.10 Process type physics/parametrization\_deep\_burial

#### Processes

burial of detritus deeper than max\_sed (sediment only) [mol/m<sup>2</sup>/day]

t\_sed ->

```
p_sed_burial = ((sed_tot-sed_tot_active)/cgt_timestep*t_sed/sed_tot)*
               lim_t_sed_20
```

burial of iron PO4 (sediment only) [mol/m<sup>2</sup>/day]

t\_ips ->

```
p_ips_burial = (ips_eff*r_ips_burial*sed_tot_active/rfr_c/sed_max)*
               lim_t_ips_22
```

burial of poc deeper than max\_sed (sediment only) [mol/m<sup>2</sup>/day]

t\_sed\_poc ->

```
p_poc_burial = ((sed_tot-sed_tot_active)/cgt_timestep*t_sed_poc/sed_tot)*
               lim_t_sed_poc_21
```

burial of pocn deeper than max\_sed (sediment only) [mol/m<sup>2</sup>/day]

t\_sed\_pocn ->

```
p_pocn_burial = ((sed_tot-sed_tot_active)/cgt_timestep*t_sed_pocn/sed_tot)*
                lim_t_sed_pocn_26
```

burial of pocp deeper than max\_sed (sediment only) [mol/m<sup>2</sup>/day]

t\_sed\_pocp ->

```
p_pocp_burial = ((sed_tot-sed_tot_active)/cgt_timestep*t_sed_pocp/sed_tot)*
                lim_t_sed_pocp_27
```

burial of detritus deeper than max\_sed; sub-process for atmos\_tot nitrogen (sediment only) [mol/m<sup>2</sup>/day]

->

```
                p_sed_burial * ((1.0)*(1)*
p_sed_burial_atmos_tmax(0.0,min(1.0,t_sed_with_atmos_tot_N/max(0.00000000001,t_sed)
=                ))) / ((1.0)*(1))
```

burial of pocn deeper than max\_sed; sub-process for atmos\_tot nitrogen (sediment only) [mol/m<sup>2</sup>/day]

->

```
                p_pocn_burial * ((1.0)*(1)*
p_pocn_burial_atmos_max(0.0,min(1.0,t_sed_pocn_with_atmos_tot_N/max(0.00000000001,t_sed_pocn)
=                ))) / ((1.0)*(1))
```

burial of detritus deeper than max\_sed; sub-process for atmos\_ship nitrogen (sediment only) [mol/m<sup>2</sup>/day]

continued on next page...

| Processes, continued from previous page                                                                                                     |                                                                            |
|---------------------------------------------------------------------------------------------------------------------------------------------|----------------------------------------------------------------------------|
| ->                                                                                                                                          |                                                                            |
| $p\_sed\_burial * ((1.0)*(1)*$                                                                                                              |                                                                            |
| $p\_sed\_burial\_atmos\_smax(0.0,min(1.0,t\_sed\_with\_atmos\_ship\_N/max(0.0000000001,t\_sed)$                                             |                                                                            |
| $= ))) / ((1.0)*(1))$                                                                                                                       |                                                                            |
| <b>burial of pocn deeper than max_sed; sub-process for atmos_ship nitrogen (sediment only) [mol/m<sup>2</sup>/day]</b>                      |                                                                            |
| ->                                                                                                                                          |                                                                            |
| $p\_pocn\_burial * ((1.0)*(1)*$                                                                                                             |                                                                            |
| $p\_pocn\_burial\_atmos\_max(0.0,min(1.0,t\_sed\_pocn\_with\_atmos\_ship\_N/max(0.0000000001,t\_sed\_pocn$                                  |                                                                            |
| $= ))) / ((1.0)*(1))$                                                                                                                       |                                                                            |
| Auxiliary variables                                                                                                                         |                                                                            |
| <b>total carbon in sediment layer [mol/m<sup>2</sup>]</b>                                                                                   |                                                                            |
| $sed\_tot =$                                                                                                                                | $t\_sed*rfr\_c + t\_sed\_poc + t\_sed\_pocn*rfr\_c + t\_sed\_pocp*rfr\_cp$ |
| <b>total carbon in active sediment layer [mol/m<sup>2</sup>]</b>                                                                            |                                                                            |
| $sed\_tot\_active =$                                                                                                                        | $max(0.0,min(sed\_tot,sed\_max*rfr\_c))$                                   |
| <b>effective concentration of iron phosphate in the sediment assumed for burial (enhanced burial above a threshold) [mol/m<sup>2</sup>]</b> |                                                                            |
| $ips\_eff =$                                                                                                                                | $max(t\_ips,t\_ips+t\_ips*(t\_ips-ips\_threshold)/ips\_cl)$                |
| Constants                                                                                                                                   |                                                                            |
| <b>threshold for increased PO<sub>4</sub> burial [mol/m<sup>2</sup>]</b>                                                                    |                                                                            |
| $ips\_threshold =$                                                                                                                          | 0.1                                                                        |
| <b>iron phosphate in sediment closure parameter [mol/m<sup>2</sup>]</b>                                                                     |                                                                            |
| $ips\_cl =$                                                                                                                                 | 0.02025                                                                    |
| <b>final burial rate for PO<sub>4</sub> [1/day]</b>                                                                                         |                                                                            |
| $r\_ips\_burial =$                                                                                                                          | 0.0018                                                                     |
| <b>redfield ratio C/N</b>                                                                                                                   |                                                                            |
| $rfr\_c =$                                                                                                                                  | 6.625                                                                      |
| <b>redfield ratio C/P</b>                                                                                                                   |                                                                            |
| $rfr\_cp =$                                                                                                                                 | 106.0                                                                      |
| <b>maximum sediment detritus concentration that feels erosion [mol/m<sup>2</sup>]</b>                                                       |                                                                            |
| $sed\_max =$                                                                                                                                | 1.0                                                                        |
| Process limitation factors                                                                                                                  |                                                                            |
| $lim\_t\_sed\_20 =$                                                                                                                         | $theta(t\_sed-0.0)$                                                        |
| continued on next page...                                                                                                                   |                                                                            |

## Process limitation factors, continued from previous page

```
lim_t_ips_22 =      theta(t_ips-0.0)
```

```
lim_t_sed_poc_21 =  theta(t_sed_poc-0.0)
```

```
lim_t_sed_pocn_26 = theta(t_sed_pocn-0.0)
```

```
lim_t_sed_pocp_27 = theta(t_sed_pocp-0.0)
```



### 3.11 Process type physics/sedimentation

| Processes                                                                                                                                                                                                                                                                                                                                                  |
|------------------------------------------------------------------------------------------------------------------------------------------------------------------------------------------------------------------------------------------------------------------------------------------------------------------------------------------------------------|
| <b>detritus sedimentation (sediment only) [mol/m<sup>2</sup>/day]</b><br><code>t_det -&gt; t_sed</code><br><code>p_det_sedi_sed = ((1.0-erosion_is_active)*(0.0-w_det_sedi)*t_det*<br/> cgt_density)*lim_t_det_19</code>                                                                                                                                   |
| <b>sedimentation of iron PO4 (sediment only) [mol/m<sup>2</sup>/day]</b><br><code>t_ipw -&gt; t_ips</code><br><code>p_ipw_sedi_ips = ((1.0-erosion_is_active)*(0.0-w_ipw_sedi)*t_ipw*<br/> cgt_density)*lim_t_ipw_25</code>                                                                                                                                |
| <b>poc sedimentation (sediment only) [mol/m<sup>2</sup>/day]</b><br><code>t_poc -&gt; t_sed_poc</code><br><code>p_poc_sedi_sed = ((1.0-erosion_is_active)*(0.0-w_poc_sedi)*t_poc*<br/> cgt_density)*lim_t_poc_12</code>                                                                                                                                    |
| <b>pocn sedimentation (sediment only) [mol/m<sup>2</sup>/day]</b><br><code>t_pocn -&gt; t_sed_pocn</code><br><code>p_pocn_sedi_sed = ((1.0-erosion_is_active)*(0.0-w_pocn_sedi)*t_pocn*<br/> cgt_density)*lim_t_pocn_14</code>                                                                                                                             |
| <b>pocp sedimentation (sediment only) [mol/m<sup>2</sup>/day]</b><br><code>t_pocp -&gt; t_sed_pocp</code><br><code>p_pocp_sedi_sed = ((1.0-erosion_is_active)*(0.0-w_pocp_sedi)*t_pocp*<br/> cgt_density)*lim_t_pocp_13</code>                                                                                                                             |
| <b>detritus sedimentation; sub-process for atmos_tot nitrogen (sediment only)</b><br><b>[mol/m<sup>2</sup>/day]</b><br><code>-&gt; t_sed_with_atmos_tot_N</code><br><code>p_det_sedi_sed * ((1.0)*(1)*</code><br><code>p_det_sedi_sed_atmosmax(0.0,min(1.0,t_det_with_atmos_tot_N/max(0.00000000001,t_det)</code><br><code>= ))) / ((1.0)*(1))</code>      |
| <b>pocn sedimentation; sub-process for atmos_tot nitrogen (sediment only)</b><br><b>[mol/m<sup>2</sup>/day]</b><br><code>-&gt; t_sed_pocn_with_atmos_tot_N</code><br><code>p_pocn_sedi_sed * ((1.0)*(1)*</code><br><code>p_pocn_sedi_sed_atmcmmax(0.0,min(1.0,t_pocn_with_atmos_tot_N/max(0.00000000001,t_pocn)</code><br><code>= ))) / ((1.0)*(1))</code> |
| <b>detritus sedimentation; sub-process for atmos_ship nitrogen (sediment only)</b><br><b>[mol/m<sup>2</sup>/day]</b><br><div>continued on next page...</div>                                                                                                                                                                                               |

## Processes, continued from previous page

```

-> t_sed_with_atmos_ship_N
      p_det_sedi_sed * ((1.0)*(1)*
p_det_sedi_sed_atmosmax(0.0,min(1.0,t_det_with_atmos_ship_N/max(0.00000000001,t_det)
=      ))) / ((1.0)*(1))

```

**pocn sedimentation; sub-process for atmos\_ship nitrogen (sediment only)**[mol/m<sup>2</sup>/day]

```

-> t_sed_pocn_with_atmos_ship_N
      p_pocn_sedi_sed * ((1.0)*(1)*
p_pocn_sedi_sed_atmcmmax(0.0,min(1.0,t_pocn_with_atmos_ship_N/max(0.00000000001,t_pocn)
=      ))) / ((1.0)*(1))

```

**Auxiliary variables**

switch (1=erosion, 0=no erosion) which depends on the combined bottom stress of currents and waves

```
erosion_is_active = theta(cgt_current_wave_stress - critical_stress)
```

**Constants****critical shear stress for sediment erosion [N/m<sup>2</sup>]**

critical\_stress = 0.016

**sedimentation velocity (negative for downward) [m/day]**

w\_det\_sedi = -2.25

**sedimentation velocity for iron PO<sub>4</sub> [m/day]**

w\_ipw\_sedi = -0.5

**sedimentation velocity (negative for downward) [m/day]**

w\_poc\_sedi = -0.1

**sedimentation velocity (negative for downward) [m/day]**

w\_pocp\_sedi = -0.05

**sedimentation velocity (negative for downward) [m/day]**

w\_pocn\_sedi = -0.05

**Process limitation factors**

lim\_t\_ipw\_25 = theta(t\_ipw-0.0)

lim\_t\_det\_19 = theta(t\_det-0.0)

lim\_t\_poc\_12 = theta(t\_poc-0.0)

lim\_t\_pocp\_13 = theta(t\_pocp-0.0)

continued on next page...

## Process limitation factors, continued from previous page

```
lim_t_pocn_14 =      theta(t_pocn-0.0)
```

### 3.12 Process type standard

| Processes                                                                     |                                                                 |
|-------------------------------------------------------------------------------|-----------------------------------------------------------------|
| particle formation from DOC [mol/kg/day]                                      |                                                                 |
| t_doc -> t_poc                                                                |                                                                 |
| p_doc2pco =                                                                   | (t_doc * r_doc2poc)*lim_t_doc_28                                |
| particle formation from DOP [mol/kg/day]                                      |                                                                 |
| t_dop -> t_pocp                                                               |                                                                 |
| p_dop2pocp =                                                                  | (t_dop * r_dop2pocp)*lim_t_dop_29                               |
| particle formation from DON [mol/kg/day]                                      |                                                                 |
| t_don -> t_pocn                                                               |                                                                 |
| p_don2pocn =                                                                  | (t_don * r_don2pocn)*lim_t_don_30                               |
| particle formation from DON; sub-process for atmos_tot nitrogen [mol/kg/day]  |                                                                 |
| -> t_pocn_with_atmos_tot_N                                                    |                                                                 |
|                                                                               | p_don2pocn * ((1.0)*(1)*                                        |
| p_don2pocn_atmos_tot                                                          | max(0.0,min(1.0,t_don_with_atmos_tot_N/max(0.0000000001,t_don)  |
| =                                                                             | ))) / ((1.0)*(1))                                               |
| particle formation from DON; sub-process for atmos_ship nitrogen [mol/kg/day] |                                                                 |
| -> t_pocn_with_atmos_ship_N                                                   |                                                                 |
|                                                                               | p_don2pocn * ((1.0)*(1)*                                        |
| p_don2pocn_atmos_ship                                                         | max(0.0,min(1.0,t_don_with_atmos_ship_N/max(0.0000000001,t_don) |
| =                                                                             | ))) / ((1.0)*(1))                                               |
| Auxiliary variables                                                           |                                                                 |
| Constants                                                                     |                                                                 |
| POC formation rate                                                            |                                                                 |
| r_doc2poc =                                                                   | 0.01                                                            |
| POCN formation rate                                                           |                                                                 |
| r_don2pocn =                                                                  | 0.01                                                            |
| POCP formation rate                                                           |                                                                 |
| r_dop2pocp =                                                                  | 0.01                                                            |
| Process limitation factors                                                    |                                                                 |
| lim_t_doc_28 =                                                                | theta(t_doc-0.0)                                                |
| lim_t_dop_29 =                                                                | theta(t_dop-0.0)                                                |
| lim_t_don_30 =                                                                | theta(t_don-0.0)                                                |

## 4 Tracer equations

| Tracer equations                                                |  |                                                                                                   |
|-----------------------------------------------------------------|--|---------------------------------------------------------------------------------------------------|
| <b>Change of: dissolved molecular nitrogen</b>                  |  |                                                                                                   |
| $\frac{d}{dt} t_{n2} =$                                         |  |                                                                                                   |
| + (p_poc_denit)*(0.4)                                           |  | recycling of POC using nitrate (denitrification)                                                  |
| + (p_pocp_denit)*(42.4)                                         |  | recycling of POC using nitrate (denitrification)                                                  |
| + (p_pocn_denit_wiN2)*(2.65)                                    |  | recycling of POCN using nitrate (denitrification)                                                 |
| + (p_det_denit_nh4)*(2.65)                                      |  | recycling of detritus using nitrate (denitrification)                                             |
| + (p_nh4_nitdenit_n2)*(0.5) / (cgt_cellheight*cgt_density)      |  | coupled nitrification and denitrification after mineralization of detritus in oxic sediments      |
| + (p_sed_denit_nh4_wiN2)*(2.65) / (cgt_cellheight*cgt_density)  |  | recycling of sedimentary detritus to ammonium using nitrate (denitrification)                     |
| + (p_sed_poc_denit)*(0.4) / (cgt_cellheight*cgt_density)        |  | recycling of sedimentary poc to dic using nitrate (denitrification)                               |
| + (p_h2s_oxno3_sul)*(0.2)                                       |  | oxidation of hydrogen sulfide with nitrate                                                        |
| + (p_sul_oxno3_so4)*(0.6)                                       |  | oxidation of elemental sulfur with nitrate                                                        |
| + (p_sed_pocn_denit_wiN2)*(2.65) / (cgt_cellheight*cgt_density) |  | recycling of sedimentary pocn to dic and NH4 using nitrate (denitrification)                      |
| + (p_sed_pocp_denit)*(42.4) / (cgt_cellheight*cgt_density)      |  | recycling of sedimentary pocp to dic and PO4 using nitrate (denitrification)                      |
| + (p_nh4_nitdenit_pocn_n2)*(0.5) / (cgt_cellheight*cgt_density) |  | coupled nitrification and denitrification after mineralization of pocn-detritus in oxic sediments |
| continued on next page...                                       |  |                                                                                                   |

## Tracer equations, continued from previous page

|                             |                                                    |
|-----------------------------|----------------------------------------------------|
| + (p_doc_denit)*(0.4)       | recycling of DOC using nitrate (denitrification)   |
| + (p_dop_denit)*(42.4)      | recycling of DOP using nitrate (denitrification)   |
| + (p_don_denit_wiN2)*(2.65) | recycling of DON using nitrate (denitrification)   |
| - (p_n2_assim_cya)*(0.5)    | fixation of dinitrogen by diazotroph cyanobacteria |

## Change of: dissolved oxygen

$$\frac{d}{dt} t_{o2} =$$

|                                 |                                                      |
|---------------------------------|------------------------------------------------------|
| + (p_no3_assim_lpp)*(8.625)     | assimilation of nitrate by large-cell phytoplankton  |
| + (p_nh4_assim_lpp)*(6.625)     | assimilation of ammonium by large-cell phytoplankton |
| + (p_no3_assim_spp)*(8.625)     | assimilation of nitrate by small-cell phytoplankton  |
| + (p_nh4_assim_spp)*(6.625)     | assimilation of ammonium by small-cell phytoplankton |
| + (p_n2_assim_cya)*(7.375)      | fixation of dinitrogen by diazotroph cyanobacteria   |
| + p_assim_lpp_doc               | Production of DOC by LPP                             |
| + p_assim_spp_doc               | Production of DOC by SPP                             |
| + p_assim_cya_doc               | Production of POC by CYA                             |
| + (p_assim_lpp_dop)*(106)       | Production of DOP by LPP                             |
| + (p_assim_spp_dop)*(106)       | Production of DOP by SPP                             |
| + (p_nh4_assim_lpp_don)*(6.625) | Production of DON by LPP                             |
| + (p_no3_assim_lpp_don)*(8.625) | Production of DON by LPP                             |

continued on next page...

| Tracer equations, continued from previous page                     |                                                                                                         |
|--------------------------------------------------------------------|---------------------------------------------------------------------------------------------------------|
| + (p_nh4_assim_spp_don)*(6.625)                                    | Production of DON by SPP                                                                                |
| + (p_no3_assim_spp_don)*(8.625)                                    | Production of DON by SPP                                                                                |
| - p_poc_resp                                                       | respiration of POC                                                                                      |
| - (p_pocp_resp)*(106)                                              | respiration of POCP                                                                                     |
| - (p_pocn_resp)*(6.625)                                            | respiration of POCN                                                                                     |
| - (p_lpp_resp_nh4)*(6.625)                                         | respiration of large-cell phytoplankton                                                                 |
| - (p_spp_resp_nh4)*(6.625)                                         | respiration of small-cell phytoplankton                                                                 |
| - (p_cya_resp_nh4)*(6.625)                                         | respiration of diazotroph cyanobacteria                                                                 |
| - (p_zoo_resp_nh4)*(6.625)                                         | respiration of zooplankton                                                                              |
| - (p_nh4_nit_no3)*(2)                                              | nitrification                                                                                           |
| - (p_det_resp_nh4)*(6.625)                                         | recycling of detritus using oxygen (respiration)                                                        |
| - (p_sed_resp_nh4)*(6.625)<br>/(cgt_cellheight*cgt_density)        | recycling of sedimentary detritus to ammonium<br>using oxygen (respiration)                             |
| - (p_nh4_nitdenit_n2)*(0.75)<br>/(cgt_cellheight*cgt_density)      | coupled nitrification and denitrification after<br>mineralization of detritus in oxic sediments         |
| - p_sed_poc_resp/(cgt_cellheight*cgt_density)                      | recycling of sedimentary poc to dic using<br>oxygen (respiration)                                       |
| - (p_h2s_oxo2_sul)*(0.5)                                           | oxidation of hydrogen sulfide with oxygen                                                               |
| - (p_sul_oxo2_so4)*(1.5)                                           | oxidation of elemental sulfur with oxygen                                                               |
| - (p_sed_pocn_resp)*(6.625)<br>/(cgt_cellheight*cgt_density)       | recycling of sedimentary pocn to dic and NH4<br>using oxygen (respiration)                              |
| - (p_sed_pocp_resp)*(106)<br>/(cgt_cellheight*cgt_density)         | recycling of sedimentary pocp to dic and PO4<br>using oxygen (respiration)                              |
| - (p_nh4_nitdenit_pocn_n2)*(0.75)<br>/(cgt_cellheight*cgt_density) | coupled nitrification and denitrification after<br>mineralization of pocn-detritus in oxic<br>sediments |
| continued on next page...                                          |                                                                                                         |

## Tracer equations, continued from previous page

|                        |                    |
|------------------------|--------------------|
| - p_doc_resp           | respiration of DOC |
| - (p_dop_resp)*(106)   | respiration of DOP |
| - (p_don_resp)*(6.625) | respiration of DON |

**Change of: dissolved inorganic carbon, treated as carbon dioxide**

|                               |                                                                |
|-------------------------------|----------------------------------------------------------------|
| $\frac{d}{dt} t_{dic} =$      |                                                                |
| + p_poc_resp                  | respiration of POC                                             |
| + p_poc_denit                 | recycling of POC using nitrate (denitrification)               |
| + p_poc_sulf                  | Mineralization of POC, e-acceptor sulfate (sulfate reduction)  |
| + (p_pocp_resp)*(106)         | respiration of POCP                                            |
| + (p_pocp_denit)*(106)        | recycling of POC using nitrate (denitrification)               |
| + (p_pocp_sulf)*(106)         | Mineralization of POC, e-acceptor sulfate (sulfate reduction)  |
| + (p_pocn_resp)*(6.625)       | respiration of POCN                                            |
| + (p_pocn_denit_noN2)*(6.625) | recycling of POCN using nitrate (denitrification)              |
| + (p_pocn_sulf)*(6.625)       | Mineralization of POCN, e-acceptor sulfate (sulfate reduction) |
| + (p_lpp_resp_nh4)*(rfr_c)    | respiration of large-cell phytoplankton                        |
| + (p_spp_resp_nh4)*(rfr_c)    | respiration of small-cell phytoplankton                        |
| + (p_cya_resp_nh4)*(rfr_c)    | respiration of diazotroph cyanobacteria                        |
| + (p_zoo_resp_nh4)*(rfr_c)    | respiration of zooplankton                                     |
| + (p_det_resp_nh4)*(rfr_c)    | recycling of detritus using oxygen (respiration)               |
| + (p_det_denit_nh4)*(rfr_c)   | recycling of detritus using nitrate (denitrification)          |

continued on next page...



## Tracer equations, continued from previous page

|                                                                        |                                                                                 |
|------------------------------------------------------------------------|---------------------------------------------------------------------------------|
| + (p_det_sulf_nh4)*(rfr_c)                                             | recycling of detritus using sulfate (sulfate reduction)                         |
| + (p_sed_resp_nh4)*(rfr_c)<br>/(cgt_cellheight*cgt_density)            | recycling of sedimentary detritus to ammonium using oxygen (respiration)        |
| + (p_sed_denit_nh4_noN2)*<br>(rfr_c)/(cgt_cellheight*<br>cgt_density)  | recycling of sedimentary detritus to ammonium using nitrate (denitrification)   |
| + (p_sed_sulf_nh4)*(rfr_c)<br>/(cgt_cellheight*cgt_density)            | recycling of sedimentary detritus to ammonium using sulfate (sulfate reduction) |
| +<br>p_sed_poc_resp/(cgt_cellheight*<br>cgt_density)                   | recycling of sedimentary poc to dic using oxygen (respiration)                  |
| +<br>p_sed_poc_denit/(cgt_cellheight*<br>cgt_density)                  | recycling of sedimentary poc to dic using nitrate (denitrification)             |
| +<br>p_sed_poc_sulf/(cgt_cellheight*<br>cgt_density)                   | recycling of sedimentary poc to dic using sulfate (sulfate reduction)           |
| + (p_sed_pocn_resp)*(6.625)<br>/(cgt_cellheight*cgt_density)           | recycling of sedimentary pocn to dic and NH4 using oxygen (respiration)         |
| + (p_sed_pocp_resp)*(106)<br>/(cgt_cellheight*cgt_density)             | recycling of sedimentary pocp to dic and PO4 using oxygen (respiration)         |
| + (p_sed_pocn_denit_noN2)*<br>(6.625)/(cgt_cellheight*<br>cgt_density) | recycling of sedimentary pocn to dic and NH4 using nitrate (denitrification)    |
| + (p_sed_pocp_denit)*(106)<br>/(cgt_cellheight*cgt_density)            | recycling of sedimentary pocp to dic and PO4 using nitrate (denitrification)    |
| + (p_sed_pocn_sulf)*(6.625)<br>/(cgt_cellheight*cgt_density)           | recycling of sedimentary pocn to dic and NH4 using sulfate (sulfate reduction)  |
| + (p_sed_pocp_sulf)*(106)<br>/(cgt_cellheight*cgt_density)             | recycling of sedimentary pocp to dic and PO4 using sulfate (sulfate reduction)  |

continued on next page...

## Tracer equations, continued from previous page

|                              |                                                               |
|------------------------------|---------------------------------------------------------------|
| + p_doc_resp                 | respiration of DOC                                            |
| + p_doc_denit                | recycling of DOC using nitrate (denitrification)              |
| + p_doc_sulf                 | Mineralization of DOC, e-acceptor sulfate (sulfate reduction) |
| + (p_dop_resp)*(106)         | respiration of DOP                                            |
| + (p_dop_denit)*(106)        | recycling of DOP using nitrate (denitrification)              |
| + (p_dop_sulf)*(106)         | Mineralization of DOP, e-acceptor sulfate (sulfate reduction) |
| + (p_don_resp)*(6.625)       | respiration of DON                                            |
| + (p_don_denit_noN2)*(6.625) | recycling of DON using nitrate (denitrification)              |
| + (p_don_sulf)*(6.625)       | Mineralization of DON, e-acceptor sulfate (sulfate reduction) |
| - (p_no3_assim_lpp)*(rfr_c)  | assimilation of nitrate by large-cell phytoplankton           |
| - (p_nh4_assim_lpp)*(rfr_c)  | assimilation of ammonium by large-cell phytoplankton          |
| - (p_no3_assim_spp)*(rfr_c)  | assimilation of nitrate by small-cell phytoplankton           |
| - (p_nh4_assim_spp)*(rfr_c)  | assimilation of ammonium by small-cell phytoplankton          |
| - (p_n2_assim_cya)*(rfr_c)   | fixation of dinitrogen by diazotroph cyanobacteria            |
| - p_assim_lpp_doc            | Production of DOC by LPP                                      |
| - p_assim_spp_doc            | Production of DOC by SPP                                      |
| - p_assim_cya_doc            | Production of POC by CYA                                      |
| - (p_assim_lpp_dop)*(106)    | Production of DOP by LPP                                      |

continued on next page...

## Tracer equations, continued from previous page

|                                 |                          |
|---------------------------------|--------------------------|
| - (p_assim_spp_dop)*(106)       | Production of DOP by SPP |
| - (p_nh4_assim_lpp_don)*(6.625) | Production of DON by LPP |
| - (p_no3_assim_lpp_don)*(6.625) | Production of DON by LPP |
| - (p_nh4_assim_spp_don)*(6.625) | Production of DON by SPP |
| - (p_no3_assim_spp_don)*(6.625) | Production of DON by SPP |

## Change of: ammonium

|                                       |                                                                |
|---------------------------------------|----------------------------------------------------------------|
| $\frac{d}{dt} t_{nh4} =$              |                                                                |
| + p_pocn_resp                         | respiration of POCN                                            |
| + p_pocn_denit_noN2                   | recycling of POCN using nitrate (denitrification)              |
| + p_pocn_sulf                         | Mineralization of POCN, e-acceptor sulfate (sulfate reduction) |
| + (p_lpp_resp_nh4)*((1-don_fraction)) | respiration of large-cell phytoplankton                        |
| + (p_spp_resp_nh4)*((1-don_fraction)) | respiration of small-cell phytoplankton                        |
| + (p_cya_resp_nh4)*((1-don_fraction)) | respiration of diazotroph cyanobacteria                        |
| + (p_zoo_resp_nh4)*((1-don_fraction)) | respiration of zooplankton                                     |
| + p_det_resp_nh4                      | recycling of detritus using oxygen (respiration)               |
| + p_det_denit_nh4                     | recycling of detritus using nitrate (denitrification)          |
| + p_det_sulf_nh4                      | recycling of detritus using sulfate (sulfate reduction)        |

continued on next page...

## Tracer equations, continued from previous page

|                       |                                                                                                                                                                |
|-----------------------|----------------------------------------------------------------------------------------------------------------------------------------------------------------|
| +                     | recycling of sedimentary detritus to ammonium<br>$p\_sed\_resp\_nh4/(cgt\_cellheight \text{ using oxygen (respiration) } cgt\_density)$                        |
| +                     | recycling of sedimentary detritus to ammonium<br>$p\_sed\_denit\_nh4\_noN2/(cgt\_cell \text{ using nitrate (denitrification) } cgt\_density)$                  |
| +                     | recycling of sedimentary detritus to ammonium<br>$p\_sed\_sulf\_nh4/(cgt\_cellheight \text{ using sulfate (sulfate reduction) } cgt\_density)$                 |
| +                     | recycling of sedimentary pocn to dic and NH4<br>$p\_sed\_pocn\_resp/(cgt\_cellheight \text{ using oxygen (respiration) } cgt\_density)$                        |
| +                     | recycling of sedimentary pocn to dic and NH4<br>$p\_sed\_pocn\_denit\_noN2/(cgt\_cell \text{ using nitrate (denitrification) } cgt\_density)$                  |
| +                     | recycling of sedimentary pocn to dic and NH4<br>$p\_sed\_pocn\_sulf/(cgt\_cellheight \text{ using sulfate (sulfate reduction) } cgt\_density)$                 |
| + p_don_resp          | respiration of DON                                                                                                                                             |
| + p_don_denit_noN2    | recycling of DON using nitrate (denitrification)                                                                                                               |
| + p_don_sulf          | Mineralization of DON, e-acceptor sulfate<br>(sulfate reduction)                                                                                               |
| - p_nh4_assim_lpp     | assimilation of ammonium by large-cell<br>phytoplankton                                                                                                        |
| - p_nh4_assim_spp     | assimilation of ammonium by small-cell<br>phytoplankton                                                                                                        |
| - p_nh4_assim_lpp_don | Production of DON by LPP                                                                                                                                       |
| - p_nh4_assim_spp_don | Production of DON by SPP                                                                                                                                       |
| - p_nh4_nit_no3       | nitrification                                                                                                                                                  |
| -                     | coupled nitrification and denitrification after<br>$p\_nh4\_nitdenit\_n2/(cgt\_cellheight \text{ mineralization of detritus in oxic sediments } cgt\_density)$ |

continued on next page...

## Tracer equations, continued from previous page

- coupled nitrification and denitrification after  
 $p\_nh4\_nitdenit\_pocn\_n2/(cgt\_cemineralization\ of\ pocn\_detritus\ in\ oxic$   
 $cgt\_density)$  sediments

## Change of: nitrate

$\frac{d}{dt} t\_no3 =$

+  $p\_nh4\_nit\_no3$  nitrification

-  $p\_no3\_assim\_lpp$  assimilation of nitrate by large-cell phytoplankton

-  $p\_no3\_assim\_spp$  assimilation of nitrate by small-cell phytoplankton

-  $p\_no3\_assim\_lpp\_don$  Production of DON by LPP

-  $p\_no3\_assim\_spp\_don$  Production of DON by SPP

-  $(p\_poc\_denit)*(0.8)$  recycling of POC using nitrate (denitrification)

-  $(p\_pocp\_denit)*(84.8)$  recycling of POC using nitrate (denitrification)

-  $(p\_pocn\_denit\_wiN2)*(5.3)$  recycling of POCN using nitrate (denitrification)

-  $(p\_det\_denit\_nh4)*(5.3)$  recycling of detritus using nitrate (denitrification)

-  $(p\_sed\_denit\_nh4\_wiN2)*(5.3)/(cgt\_cellheight*cgt\_density)$  recycling of sedimentary detritus to ammonium using nitrate (denitrification)

-  $(p\_sed\_poc\_denit)*(0.8)/(cgt\_cellheight*cgt\_density)$  recycling of sedimentary poc to dic using nitrate (denitrification)

-  $(p\_h2s\_oxno3\_sul)*(0.4)$  oxidation of hydrogen sulfide with nitrate

-  $(p\_sul\_oxno3\_so4)*(1.2)$  oxidation of elemental sulfur with nitrate

-  $(p\_sed\_pocn\_denit\_wiN2)*(5.3)/(cgt\_cellheight*cgt\_density)$  recycling of sedimentary pocn to dic and NH4 using nitrate (denitrification)

continued on next page...

## Tracer equations, continued from previous page

- (p\_sed\_pocp\_denit)\*(84.8) / (cgt\_cellheight\*cgt\_density) recycling of sedimentary pocp to dic and PO4 using nitrate (denitrification)
- (p\_doc\_denit)\*(0.8) recycling of DOC using nitrate (denitrification)
- (p\_dop\_denit)\*(84.8) recycling of DOP using nitrate (denitrification)
- (p\_don\_denit\_wiN2)\*(5.3) recycling of DON using nitrate (denitrification)

## Change of: phosphate

$$\frac{d}{dt} t_{po4} =$$

|                                                                 |                                                                                 |
|-----------------------------------------------------------------|---------------------------------------------------------------------------------|
| + p_pocp_resp                                                   | respiration of POCP                                                             |
| + p_pocp_denit                                                  | recycling of POC using nitrate (denitrification)                                |
| + p_pocp_sulf                                                   | Mineralization of POC, e-acceptor sulfate (sulfate reduction)                   |
| + (p_lpp_resp_nh4)*(rfr_p)                                      | respiration of large-cell phytoplankton                                         |
| + (p_spp_resp_nh4)*(rfr_p)                                      | respiration of small-cell phytoplankton                                         |
| + (p_cya_resp_nh4)*(rfr_p)                                      | respiration of diazotroph cyanobacteria                                         |
| + (p_zoo_resp_nh4)*(rfr_p)                                      | respiration of zooplankton                                                      |
| + (p_det_resp_nh4)*(rfr_p)                                      | recycling of detritus using oxygen (respiration)                                |
| + (p_det_denit_nh4)*(rfr_p)                                     | recycling of detritus using nitrate (denitrification)                           |
| + (p_det_sulf_nh4)*(rfr_p)                                      | recycling of detritus using sulfate (sulfate reduction)                         |
| + (p_sed_resp_nh4)*(rfr_p) / (cgt_cellheight*cgt_density)       | recycling of sedimentary detritus to ammonium using oxygen (respiration)        |
| + (p_sed_denit_nh4_noN2)*(rfr_p) / (cgt_cellheight*cgt_density) | recycling of sedimentary detritus to ammonium using nitrate (denitrification)   |
| + (p_sed_sulf_nh4)*(rfr_p) / (cgt_cellheight*cgt_density)       | recycling of sedimentary detritus to ammonium using sulfate (sulfate reduction) |

continued on next page...

## Tracer equations, continued from previous page

|                                                               |                                                                                                                                                 |
|---------------------------------------------------------------|-------------------------------------------------------------------------------------------------------------------------------------------------|
| +                                                             | liberation of phosphate from the sediment<br>$p\_ips\_liber\_po4/(cgt\_cellheight \times cgt\_density)$<br>under anoxic conditions              |
| +                                                             | recycling of sedimentary pocp to dic and PO4<br>$p\_sed\_pocp\_resp/(cgt\_cellheight \times cgt\_density)$<br>using oxygen (respiration)        |
| +                                                             | recycling of sedimentary pocp to dic and PO4<br>$p\_sed\_pocp\_denit/(cgt\_cellheight \times cgt\_density)$<br>using nitrate (denitrification)  |
| +                                                             | recycling of sedimentary pocp to dic and PO4<br>$p\_sed\_pocp\_sulf/(cgt\_cellheight \times cgt\_density)$<br>using sulfate (sulfate reduction) |
| + p_dop_resp                                                  | respiration of DOP                                                                                                                              |
| + p_dop_denit                                                 | recycling of DOP using nitrate (denitrification)                                                                                                |
| + p_dop_sulf                                                  | Mineralization of DOP, e-acceptor sulfate<br>(sulfate reduction)                                                                                |
| - (p_no3_assim_lpp)*(rfr_p)                                   | assimilation of nitrate by large-cell<br>phytoplankton                                                                                          |
| - (p_nh4_assim_lpp)*(rfr_p)                                   | assimilation of ammonium by large-cell<br>phytoplankton                                                                                         |
| - (p_no3_assim_spp)*(rfr_p)                                   | assimilation of nitrate by small-cell<br>phytoplankton                                                                                          |
| - (p_nh4_assim_spp)*(rfr_p)                                   | assimilation of ammonium by small-cell<br>phytoplankton                                                                                         |
| - (p_n2_assim_cya)*(rfr_p)                                    | fixation of dinitrogen by diazotroph<br>cyanobacteria                                                                                           |
| - p_assim_lpp_dop                                             | Production of DOP by LPP                                                                                                                        |
| - p_assim_spp_dop                                             | Production of DOP by SPP                                                                                                                        |
| - (p_po4_retent_ips)*(rfr_p)<br>/(cgt_cellheight*cgt_density) | retention of phosphate in the sediment under<br>oxic conditions                                                                                 |

continued on next page...

## Tracer equations, continued from previous page

**Change of: small-cell phytoplankton**

|                          |                                                        |
|--------------------------|--------------------------------------------------------|
| $\frac{d}{dt} t_{spp} =$ |                                                        |
| + p_no3_assim_spp        | assimilation of nitrate by small-cell phytoplankton    |
| + p_nh4_assim_spp        | assimilation of ammonium by small-cell phytoplankton   |
| - p_spp_graz_zoo         | grazing of zooplankton eating small-cell phytoplankton |
| - p_spp_resp_nh4         | respiration of small-cell phytoplankton                |
| - p_spp_mort_det         | mortality of small-scale phytoplankton                 |

**Change of: zooplankton**

|                          |                                                        |
|--------------------------|--------------------------------------------------------|
| $\frac{d}{dt} t_{zoo} =$ |                                                        |
| + p_lpp_graz_zoo         | grazing of zooplankton eating large-cell phytoplankton |
| + p_spp_graz_zoo         | grazing of zooplankton eating small-cell phytoplankton |
| + p_cya_graz_zoo         | grazing of zooplankton eating diazotroph cyanobacteria |
| - p_zoo_resp_nh4         | respiration of zooplankton                             |
| - p_zoo_mort_det         | mortality of zooplankton                               |

**Change of: hydrogen sulfide**

|                          |                                                                |
|--------------------------|----------------------------------------------------------------|
| $\frac{d}{dt} t_{h2s} =$ |                                                                |
| + (p_poc_sulf)*(0.5)     | Mineralization of POC, e-acceptor sulfate (sulfate reduction)  |
| + (p_pocp_sulf)*(53)     | Mineralization of POC, e-acceptor sulfate (sulfate reduction)  |
| + (p_pocn_sulf)*(3.3125) | Mineralization of POCN, e-acceptor sulfate (sulfate reduction) |

continued on next page...



## Tracer equations, continued from previous page

|                                                               |                                                                                 |
|---------------------------------------------------------------|---------------------------------------------------------------------------------|
| + (p_det_sulf_nh4)*(3.3125)                                   | recycling of detritus using sulfate (sulfate reduction)                         |
| + (p_sed_sulf_nh4)*(3.3125)<br>/(cgt_cellheight*cgt_density)  | recycling of sedimentary detritus to ammonium using sulfate (sulfate reduction) |
| + (p_sed_poc_sulf)*(0.5)<br>/(cgt_cellheight*cgt_density)     | recycling of sedimentary poc to dic using sulfate (sulfate reduction)           |
| + (p_sed_pocn_sulf)*(3.3125)<br>/(cgt_cellheight*cgt_density) | recycling of sedimentary pocn to dic and NH4 using sulfate (sulfate reduction)  |
| + (p_sed_pocp_sulf)*(53)<br>/(cgt_cellheight*cgt_density)     | recycling of sedimentary pocp to dic and PO4 using sulfate (sulfate reduction)  |
| + (p_doc_sulf)*(0.5)                                          | Mineralization of DOC, e-acceptor sulfate (sulfate reduction)                   |
| + (p_dop_sulf)*(53)                                           | Mineralization of DOP, e-acceptor sulfate (sulfate reduction)                   |
| + (p_don_sulf)*(3.3125)                                       | Mineralization of DON, e-acceptor sulfate (sulfate reduction)                   |
| - p_h2s_oxo2_sul                                              | oxidation of hydrogen sulfide with oxygen                                       |
| - p_h2s_oxno3_sul                                             | oxidation of hydrogen sulfide with nitrate                                      |

## Change of: sulfur

|                          |                                            |
|--------------------------|--------------------------------------------|
| $\frac{d}{dt} t_{sul} =$ |                                            |
| + p_h2s_oxo2_sul         | oxidation of hydrogen sulfide with oxygen  |
| + p_h2s_oxno3_sul        | oxidation of hydrogen sulfide with nitrate |
| - p_sul_oxo2_so4         | oxidation of elemental sulfur with oxygen  |
| - p_sul_oxno3_so4        | oxidation of elemental sulfur with nitrate |

## Change of: total alkalinity

|                           |                                        |
|---------------------------|----------------------------------------|
| $\frac{d}{dt} t_{alk} =$  |                                        |
| + (1)*(p_pocn_resp)*(0.5) | respiration of POCN (produces ohminus) |

continued on next page...

## Tracer equations, continued from previous page

|                                                                  |                                                                                                   |
|------------------------------------------------------------------|---------------------------------------------------------------------------------------------------|
| + (1)*(p_pocn_denit_noN2)*(0.5)                                  | recycling of POCN using nitrate (denitrification) (produces ohminus)                              |
| + (1)*(p_pocn_sulf)*(0.5)                                        | Mineralization of POCN, e-acceptor sulfate (sulfate reduction) (produces ohminus)                 |
| + (1)*(p_sed_pocn_resp)*(0.5)/(cgt_cellheight*cgt_density)       | recycling of sedimentary pocn to dic and NH4 using oxygen (respiration) (produces ohminus)        |
| + (1)*(p_sed_pocn_denit_noN2)*(0.5)/(cgt_cellheight*cgt_density) | recycling of sedimentary pocn to dic and NH4 using nitrate (denitrification) (produces ohminus)   |
| + (1)*(p_sed_pocn_sulf)*(0.5)/(cgt_cellheight*cgt_density)       | recycling of sedimentary pocn to dic and NH4 using sulfate (sulfate reduction) (produces ohminus) |
| + (1)*(p_don_resp)*(0.5)                                         | respiration of DON (produces ohminus)                                                             |
| + (1)*(p_don_denit_noN2)*(0.5)                                   | recycling of DON using nitrate (denitrification) (produces ohminus)                               |
| + (1)*(p_don_sulf)*(0.5)                                         | Mineralization of DON, e-acceptor sulfate (sulfate reduction) (produces ohminus)                  |
| - (1)*(p_nh4_assim_lpp_don)                                      | Production of DON by LPP (consumes ohminus)                                                       |
| - (1)*(p_nh4_assim_spp_don)                                      | Production of DON by SPP (consumes ohminus)                                                       |
| - (1)*(p_pocp_denit)*(3)                                         | recycling of POC using nitrate (denitrification) (consumes ohminus)                               |
| - (1)*(p_pocp_sulf)*(3)                                          | Mineralization of POC, e-acceptor sulfate (sulfate reduction) (consumes ohminus)                  |
| - (1)*(p_sed_pocp_denit)*(3)/(cgt_cellheight*cgt_density)        | recycling of sedimentary pocp to dic and PO4 using nitrate (denitrification) (consumes ohminus)   |
| - (1)*(p_sed_pocp_sulf)*(3)/(cgt_cellheight*cgt_density)         | recycling of sedimentary pocp to dic and PO4 using sulfate (sulfate reduction) (consumes ohminus) |

continued on next page...

## Tracer equations, continued from previous page

|                                                                      |                                                                                                                            |
|----------------------------------------------------------------------|----------------------------------------------------------------------------------------------------------------------------|
| $-(1)*(p\_dop\_denit)*(3)$                                           | recycling of DOP using nitrate (denitrification)<br>(consumes ohminus)                                                     |
| $-(1)*(p\_dop\_sulf)*(3)$                                            | Mineralization of DOP, e-acceptor sulfate<br>(sulfate reduction) (consumes ohminus)                                        |
| $+( -1)*(p\_nh4\_assim\_lpp)*(0.8125)$                               | assimilation of ammonium by large-cell<br>phytoplankton (produces h3oplus)                                                 |
| $+( -1)*(p\_nh4\_assim\_spp)*(0.8125)$                               | assimilation of ammonium by small-cell<br>phytoplankton (produces h3oplus)                                                 |
| $+( -1)*(p\_pocp\_resp)*(3)$                                         | respiration of POCP (produces h3oplus)                                                                                     |
| $+( -1)*(p\_nh4\_nit\_no3)*(2)$                                      | nitrification (produces h3oplus)                                                                                           |
| $+( -1)*(p\_nh4\_nitdenit\_n2)/(cgt\_cellheight*cgt\_density)$       | coupled nitrification and denitrification after<br>mineralization of detritus in oxic sediments<br>(produces h3oplus)      |
| $+( -1)*(p\_sul\_oxo2\_so4)*(2)$                                     | oxidation of elemental sulfur with oxygen<br>(produces h3oplus)                                                            |
| $+( -1)*(p\_sul\_oxno3\_so4)*(0.8)$                                  | oxidation of elemental sulfur with nitrate<br>(produces h3oplus)                                                           |
| $+( -1)*(p\_sed\_pocp\_resp)*(3)/(cgt\_cellheight*cgt\_density)$     | recycling of sedimentary pocp to dic and PO4<br>using oxygen (respiration) (produces h3oplus)                              |
| $+( -1)*(p\_nh4\_nitdenit\_pocn\_n2)/(cgt\_cellheight*cgt\_density)$ | coupled nitrification and denitrification after<br>mineralization of pocn-detritus in oxic<br>sediments (produces h3oplus) |
| $+( -1)*(p\_dop\_resp)*(3)$                                          | respiration of DOP (produces h3oplus)                                                                                      |
| $-( -1)*(p\_no3\_assim\_lpp)*(1.1875)$                               | assimilation of nitrate by large-cell<br>phytoplankton (consumes h3oplus)                                                  |
| $-( -1)*(p\_no3\_assim\_spp)*(1.1875)$                               | assimilation of nitrate by small-cell<br>phytoplankton (consumes h3oplus)                                                  |
| $-( -1)*(p\_n2\_assim\_cya)*(0.1875)$                                | fixation of dinitrogen by diazotroph<br>cyanobacteria (consumes h3oplus)                                                   |

continued on next page...

## Tracer equations, continued from previous page

- $(-1) * (p\_assim\_lpp\_dop) * (3)$  Production of DOP by LPP (consumes h3oplus)
- $(-1) * (p\_assim\_spp\_dop) * (3)$  Production of DOP by SPP (consumes h3oplus)
- $(-1) * (p\_no3\_assim\_lpp\_don)$  Production of DON by LPP (consumes h3oplus)
- $(-1) * (p\_no3\_assim\_spp\_don)$  Production of DON by SPP (consumes h3oplus)
- $(-1) * (p\_poc\_denit) * (0.8)$  recycling of POC using nitrate (denitrification) (consumes h3oplus)
- $(-1) * (p\_poc\_sulf)$  Mineralization of POC, e-acceptor sulfate (sulfate reduction) (consumes h3oplus)
- $(-1) * (p\_pocp\_denit) * (84.8)$  recycling of POC using nitrate (denitrification) (consumes h3oplus)
- $(-1) * (p\_pocp\_sulf) * (106)$  Mineralization of POC, e-acceptor sulfate (sulfate reduction) (consumes h3oplus)
- $(-1) * (p\_pocn\_resp) * (0.5)$  respiration of POCN (consumes h3oplus)
- $(-1) * (p\_pocn\_denit\_noN2) * (5.8)$  recycling of POCN using nitrate (denitrification) (consumes h3oplus)
- $(-1) * (p\_pocn\_sulf) * (7.125)$  Mineralization of POCN, e-acceptor sulfate (sulfate reduction) (consumes h3oplus)
- $(-1) * (p\_lpp\_resp\_nh4) * (0.8125)$  respiration of large-cell phytoplankton (consumes h3oplus)
- $(-1) * (p\_spp\_resp\_nh4) * (0.8125)$  respiration of small-cell phytoplankton (consumes h3oplus)
- $(-1) * (p\_cya\_resp\_nh4) * (0.8125)$  respiration of diazotroph cyanobacteria (consumes h3oplus)
- $(-1) * (p\_zoo\_resp\_nh4) * (0.8125)$  respiration of zooplankton (consumes h3oplus)

continued on next page...

## Tracer equations, continued from previous page

|                                                                                     |                                                                                                    |
|-------------------------------------------------------------------------------------|----------------------------------------------------------------------------------------------------|
| $- (-1) * (p\_det\_resp\_nh4) * (0.8125)$                                           | recycling of detritus using oxygen (respiration) (consumes h3oplus)                                |
| $- (-1) * (p\_det\_denit\_nh4) * (6.1125)$                                          | recycling of detritus using nitrate (denitrification) (consumes h3oplus)                           |
| $- (-1) * (p\_det\_sulf\_nh4) * (7.4375)$                                           | recycling of detritus using sulfate (sulfate reduction) (consumes h3oplus)                         |
| $- (-1) * (p\_sed\_resp\_nh4) * (0.8125) / (cgt\_cellheight * cgt\_density)$        | recycling of sedimentary detritus to ammonium using oxygen (respiration) (consumes h3oplus)        |
| $- (-1) * (p\_sed\_denit\_nh4\_noN2) * (6.1125) / (cgt\_cellheight * cgt\_density)$ | recycling of sedimentary detritus to ammonium using nitrate (denitrification) (consumes h3oplus)   |
| $- (-1) * (p\_sed\_sulf\_nh4) * (7.4375) / (cgt\_cellheight * cgt\_density)$        | recycling of sedimentary detritus to ammonium using sulfate (sulfate reduction) (consumes h3oplus) |
| $- (-1) * (p\_sed\_poc\_denit) * (0.8) / (cgt\_cellheight * cgt\_density)$          | recycling of sedimentary poc to dic using nitrate (denitrification) (consumes h3oplus)             |
| $- (-1) * (p\_sed\_poc\_sulf) / (cgt\_cellheight * cgt\_density)$                   | recycling of sedimentary poc to dic using sulfate (sulfate reduction) (consumes h3oplus)           |
| $- (-1) * (p\_h2s\_oxno3\_sul) * (0.4)$                                             | oxidation of hydrogen sulfide with nitrate (consumes h3oplus)                                      |
| $- (-1) * (p\_sed\_pocn\_resp) * (0.5) / (cgt\_cellheight * cgt\_density)$          | recycling of sedimentary pocn to dic and NH4 using oxygen (respiration) (consumes h3oplus)         |
| $- (-1) * (p\_sed\_pocp\_denit) * (84.8) / (cgt\_cellheight * cgt\_density)$        | recycling of sedimentary pocp to dic and PO4 using nitrate (denitrification) (consumes h3oplus)    |
| $- (-1) * (p\_sed\_pocn\_sulf) * (7.125) / (cgt\_cellheight * cgt\_density)$        | recycling of sedimentary pocn to dic and NH4 using sulfate (sulfate reduction) (consumes h3oplus)  |

continued on next page...

## Tracer equations, continued from previous page

|                                                             |                                                                                                   |
|-------------------------------------------------------------|---------------------------------------------------------------------------------------------------|
| - (-1)*(p_sed_pocp_sulf)*(106)/(cgt_cellheight*cgt_density) | recycling of sedimentary pocp to dic and PO4 using sulfate (sulfate reduction) (consumes h3oplus) |
| - (-1)*(p_doc_denit)*(0.8)                                  | recycling of DOC using nitrate (denitrification) (consumes h3oplus)                               |
| - (-1)*(p_doc_sulf)                                         | Mineralization of DOC, e-acceptor sulfate (sulfate reduction) (consumes h3oplus)                  |
| - (-1)*(p_dop_denit)*(84.8)                                 | recycling of DOP using nitrate (denitrification) (consumes h3oplus)                               |
| - (-1)*(p_dop_sulf)*(106)                                   | Mineralization of DOP, e-acceptor sulfate (sulfate reduction) (consumes h3oplus)                  |
| - (-1)*(p_don_resp)*(0.5)                                   | respiration of DON (consumes h3oplus)                                                             |
| - (-1)*(p_don_denit_noN2)*(5.8)                             | recycling of DON using nitrate (denitrification) (consumes h3oplus)                               |
| - (-1)*(p_don_sulf)*(7.125)                                 | Mineralization of DON, e-acceptor sulfate (sulfate reduction) (consumes h3oplus)                  |
| + (2)*(p_pocp_resp)                                         | respiration of POCP (produces t_po4)                                                              |
| + (2)*(p_pocp_denit)                                        | recycling of POC using nitrate (denitrification) (produces t_po4)                                 |
| + (2)*(p_pocp_sulf)                                         | Mineralization of POC, e-acceptor sulfate (sulfate reduction) (produces t_po4)                    |
| + (2)*(p_lpp_resp_nh4)*(rfr_p)                              | respiration of large-cell phytoplankton (produces t_po4)                                          |
| + (2)*(p_spp_resp_nh4)*(rfr_p)                              | respiration of small-cell phytoplankton (produces t_po4)                                          |
| + (2)*(p_cya_resp_nh4)*(rfr_p)                              | respiration of diazotroph cyanobacteria (produces t_po4)                                          |
| + (2)*(p_zoo_resp_nh4)*(rfr_p)                              | respiration of zooplankton (produces t_po4)                                                       |

continued on next page...

## Tracer equations, continued from previous page

|                                                                           |                                                                                                      |
|---------------------------------------------------------------------------|------------------------------------------------------------------------------------------------------|
| $+(2)*(p\_det\_resp\_nh4)*(rfr\_p)$                                       | recycling of detritus using oxygen (respiration) (produces $t\_po4$ )                                |
| $+(2)*(p\_det\_denit\_nh4)*(rfr\_p)$                                      | recycling of detritus using nitrate (denitrification) (produces $t\_po4$ )                           |
| $+(2)*(p\_det\_sulf\_nh4)*(rfr\_p)$                                       | recycling of detritus using sulfate (sulfate reduction) (produces $t\_po4$ )                         |
| $+(2)*(p\_sed\_resp\_nh4)*(rfr\_p)/(cgt\_cellheight*cgt\_density)$        | recycling of sedimentary detritus to ammonium using oxygen (respiration) (produces $t\_po4$ )        |
| $+(2)*(p\_sed\_denit\_nh4\_noN2)*(rfr\_p)/(cgt\_cellheight*cgt\_density)$ | recycling of sedimentary detritus to ammonium using nitrate (denitrification) (produces $t\_po4$ )   |
| $+(2)*(p\_sed\_sulf\_nh4)*(rfr\_p)/(cgt\_cellheight*cgt\_density)$        | recycling of sedimentary detritus to ammonium using sulfate (sulfate reduction) (produces $t\_po4$ ) |
| $+(2)*(p\_ips\_liber\_po4)/(cgt\_cellheight*cgt\_density)$                | liberation of phosphate from the sediment under anoxic conditions (produces $t\_po4$ )               |
| $+(2)*(p\_sed\_pocp\_resp)/(cgt\_cellheight*cgt\_density)$                | recycling of sedimentary pocp to dic and PO4 using oxygen (respiration) (produces $t\_po4$ )         |
| $+(2)*(p\_sed\_pocp\_denit)/(cgt\_cellheight*cgt\_density)$               | recycling of sedimentary pocp to dic and PO4 using nitrate (denitrification) (produces $t\_po4$ )    |
| $+(2)*(p\_sed\_pocp\_sulf)/(cgt\_cellheight*cgt\_density)$                | recycling of sedimentary pocp to dic and PO4 using sulfate (sulfate reduction) (produces $t\_po4$ )  |
| $+(2)*(p\_dop\_resp)$                                                     | respiration of DOP (produces $t\_po4$ )                                                              |
| $+(2)*(p\_dop\_denit)$                                                    | recycling of DOP using nitrate (denitrification) (produces $t\_po4$ )                                |
| $+(2)*(p\_dop\_sulf)$                                                     | Mineralization of DOP, e-acceptor sulfate (sulfate reduction) (produces $t\_po4$ )                   |
| $-(2)*(p\_no3\_assim\_lpp)*(rfr\_p)$                                      | assimilation of nitrate by large-cell phytoplankton (consumes $t\_po4$ )                             |

continued on next page...

## Tracer equations, continued from previous page

|                                                                      |                                                                                   |
|----------------------------------------------------------------------|-----------------------------------------------------------------------------------|
| $-(2)*(p\_nh4\_assim\_lpp)*(rfr\_p)$                                 | assimilation of ammonium by large-cell phytoplankton (consumes $t\_po4$ )         |
| $-(2)*(p\_no3\_assim\_spp)*(rfr\_p)$                                 | assimilation of nitrate by small-cell phytoplankton (consumes $t\_po4$ )          |
| $-(2)*(p\_nh4\_assim\_spp)*(rfr\_p)$                                 | assimilation of ammonium by small-cell phytoplankton (consumes $t\_po4$ )         |
| $-(2)*(p\_n2\_assim\_cya)*(rfr\_p)$                                  | fixation of dinitrogen by diazotroph cyanobacteria (consumes $t\_po4$ )           |
| $-(2)*(p\_assim\_lpp\_dop)$                                          | Production of DOP by LPP (consumes $t\_po4$ )                                     |
| $-(2)*(p\_assim\_spp\_dop)$                                          | Production of DOP by SPP (consumes $t\_po4$ )                                     |
| $-(2)*(p\_po4\_retent\_ips)*(rfr\_p)/(cgt\_cellheight*cgt\_density)$ | retention of phosphate in the sediment under oxic conditions (consumes $t\_po4$ ) |

## Change of: sediment detritus

|                              |                                                                                 |
|------------------------------|---------------------------------------------------------------------------------|
| $\frac{d}{dt} t\_sed =$      |                                                                                 |
| $+ p\_det\_sedi\_sed$        | detritus sedimentation                                                          |
| $- p\_sed\_resp\_nh4$        | recycling of sedimentary detritus to ammonium using oxygen (respiration)        |
| $- p\_sed\_denit\_nh4\_noN2$ | recycling of sedimentary detritus to ammonium using nitrate (denitrification)   |
| $- p\_sed\_sulf\_nh4$        | recycling of sedimentary detritus to ammonium using sulfate (sulfate reduction) |
| $- p\_sed\_ero\_det$         | sedimentary detritus erosion                                                    |
| $- p\_sed\_biores\_det$      | bio resuspension of sedimentary detritus                                        |
| $- p\_sed\_burial$           | burial of detritus deeper than $max\_sed$                                       |

## Change of: iron phosphate in sediment

 $\frac{d}{dt} t\_ips =$ 

continued on next page...



## Tracer equations, continued from previous page

|                              |                                                                   |
|------------------------------|-------------------------------------------------------------------|
| + (p_po4_retent_ips)*(rfr_p) | retention of phosphate in the sediment under oxic conditions      |
| + p_ipw_sedi_ips             | sedimentation of iron PO4                                         |
| - p_ips_liber_po4            | liberation of phosphate from the sediment under anoxic conditions |
| - p_ips_ero_ipw              | erosion of iron PO4                                               |
| - p_ips_biores_ipw           | bio resuspension of iron PO4                                      |
| - p_ips_burial               | burial of iron PO4                                                |

## Change of: dissolved organic carbon

|                                    |                                                               |
|------------------------------------|---------------------------------------------------------------|
| $\frac{d}{dt} \tau_{\text{doc}} =$ |                                                               |
| + p_assim_lpp_doc                  | Production of DOC by LPP                                      |
| + p_assim_spp_doc                  | Production of DOC by SPP                                      |
| + p_assim_cya_doc                  | Production of POC by CYA                                      |
| - p_doc2pco                        | particle formation from DOC                                   |
| - p_doc_resp                       | respiration of DOC                                            |
| - p_doc_denit                      | recycling of DOC using nitrate (denitrification)              |
| - p_doc_sulf                       | Mineralization of DOC, e-acceptor sulfate (sulfate reduction) |

## Change of: phosphorus in dissolved organic carbon in Redfield ratio

|                                    |                                                  |
|------------------------------------|--------------------------------------------------|
| $\frac{d}{dt} \tau_{\text{dop}} =$ |                                                  |
| + p_assim_lpp_dop                  | Production of DOP by LPP                         |
| + p_assim_spp_dop                  | Production of DOP by SPP                         |
| - p_dop2pocp                       | particle formation from DOP                      |
| - p_dop_resp                       | respiration of DOP                               |
| - p_dop_denit                      | recycling of DOP using nitrate (denitrification) |

continued on next page...

## Tracer equations, continued from previous page

- |              |                                                               |
|--------------|---------------------------------------------------------------|
| - p_dop_sulf | Mineralization of DOP, e-acceptor sulfate (sulfate reduction) |
|--------------|---------------------------------------------------------------|

## Change of: sediment particular carbon

- |                               |                                                                       |
|-------------------------------|-----------------------------------------------------------------------|
| $\frac{d}{dt} t_{sed\_poc} =$ |                                                                       |
| + p_poc_sedi_sed              | poc sedimentation                                                     |
| - p_sed_poc_resp              | recycling of sedimentary poc to dic using oxygen (respiration)        |
| - p_sed_poc_denit             | recycling of sedimentary poc to dic using nitrate (denitrification)   |
| - p_sed_poc_sulf              | recycling of sedimentary poc to dic using sulfate (sulfate reduction) |
| - p_sed_ero_poc               | sedimentary poc erosion                                               |
| - p_sed_biores_poc            | bio resuspension of sedimentary poc                                   |
| - p_poc_burial                | burial of poc deeper than max_sed                                     |

## Change of: sediment particular organic N+C

- |                                |                                                                              |
|--------------------------------|------------------------------------------------------------------------------|
| $\frac{d}{dt} t_{sed\_pocn} =$ |                                                                              |
| + p_pocn_sedi_sed              | pocn sedimentation                                                           |
| - p_sed_ero_pocn               | sedimentary pocn erosion                                                     |
| - p_sed_biores_pocn            | bio resuspension of sedimentary pocn                                         |
| - p_pocn_burial                | burial of pocn deeper than max_sed                                           |
| - p_sed_pocn_resp              | recycling of sedimentary pocn to dic and NH4 using oxygen (respiration)      |
| - p_sed_pocn_denit_noN2        | recycling of sedimentary pocn to dic and NH4 using nitrate (denitrification) |

## Change of: sediment particular organic P+C

$$\frac{d}{dt} t_{sed\_pocp} =$$

continued on next page...

## Tracer equations, continued from previous page

|                     |                                                                              |
|---------------------|------------------------------------------------------------------------------|
| + p_pocp_sedi_sed   | pocp sedimentation                                                           |
| - p_sed_ero_pocp    | sedimentary pocp erosion                                                     |
| - p_sed_biores_pocp | bio resuspension of sedimentary pocp                                         |
| - p_pocp_burial     | burial of pocp deeper than max_sed                                           |
| - p_sed_pocp_resp   | recycling of sedimentary pocp to dic and PO4 using oxygen (respiration)      |
| - p_sed_pocp_denit  | recycling of sedimentary pocp to dic and PO4 using nitrate (denitrification) |

## Change of: total\_atmos\_tot\_N

$$\frac{d}{dt} \text{total\_atmos\_tot\_N} =$$

## Change of: total\_atmos\_tot\_N\_at\_bottom

$$\frac{d}{dt} \text{total\_atmos\_tot\_N\_at\_bottom} =$$

## Change of: total\_atmos\_ship\_N

$$\frac{d}{dt} \text{total\_atmos\_ship\_N} =$$

## Change of: total\_atmos\_ship\_N\_at\_bottom

$$\frac{d}{dt} \text{total\_atmos\_ship\_N\_at\_bottom} =$$

## Change of: dissolved molecular nitrogen; containing nitrogen from (total) atmospheric deposition

$$\begin{aligned} \frac{d}{dt} t\_n2\_with\_atmos\_tot\_N = & \\ & - (p\_n2\_assim\_cya) * (0.5) * \quad \text{fixation of dinitrogen by diazotroph} \\ & \max(0.0, \min(1.0, t\_n2\_with\_atmccyanobacteria \\ & )) \end{aligned}$$

## Change of: ammonium; containing nitrogen from (total) atmospheric deposition

$$\begin{aligned} \frac{d}{dt} t\_nh4\_with\_atmos\_tot\_N = & \\ & + p\_pocn\_resp\_atmos\_tot\_N \quad \text{respiration of POCN; sub-process for} \\ & \quad \text{atmos\_tot nitrogen} \\ & + \quad \text{recycling of POCN using nitrate} \\ & p\_pocn\_denit\_noN2\_atmos\_tot\_N \quad \text{(denitrification); sub-process for atmos\_tot} \\ & \quad \text{nitrogen} \end{aligned}$$

continued on next page...

## Tracer equations, continued from previous page

+ p\_pocn\_sulf\_atmos\_tot\_N      Mineralization of POCN, e-acceptor sulfate (sulfate reduction); sub-process for atmos\_tot nitrogen

+      respiration of large-cell phytoplankton; sub-  
(p\_lpp\_resp\_nh4\_atmos\_tot\_N)\* process for atmos\_tot nitrogen  
((1-don\_fraction))

+      respiration of small-cell phytoplankton; sub-  
(p\_spp\_resp\_nh4\_atmos\_tot\_N)\* process for atmos\_tot nitrogen  
((1-don\_fraction))

+      respiration of diazotroph cyanobacteria; sub-  
(p\_cya\_resp\_nh4\_atmos\_tot\_N)\* process for atmos\_tot nitrogen  
((1-don\_fraction))

+      respiration of zooplankton; sub-process for  
(p\_zoo\_resp\_nh4\_atmos\_tot\_N)\* atmos\_tot nitrogen  
((1-don\_fraction))

+ p\_det\_resp\_nh4\_atmos\_tot\_N      recycling of detritus using oxygen (respiration);  
sub-process for atmos\_tot nitrogen

+ p\_det\_sulf\_nh4\_atmos\_tot\_N      recycling of detritus using sulfate (sulfate  
reduction); sub-process for atmos\_tot nitrogen

+      recycling of sedimentary detritus to ammonium  
p\_sed\_resp\_nh4\_atmos\_tot\_N/(cgt\_density)      using oxygen (respiration); sub-process for  
atmos\_tot nitrogen

+      recycling of sedimentary detritus to ammonium  
p\_sed\_denit\_nh4\_noN2\_atmos\_tot/(cgt\_density)      using nitrate (denitrification); sub-process for  
atmos\_tot nitrogen

+      recycling of sedimentary detritus to ammonium  
p\_sed\_sulf\_nh4\_atmos\_tot\_N/(cgt\_density)      using sulfate (sulfate reduction); sub-process  
for atmos\_tot nitrogen

+      recycling of sedimentary pocn to dic and NH4  
p\_sed\_pocn\_resp\_atmos\_tot\_N/(cgt\_density)      using oxygen (respiration); sub-process for  
atmos\_tot nitrogen

+      recycling of sedimentary pocn to dic and NH4  
p\_sed\_pocn\_denit\_noN2\_atmos\_tot/(cgt\_density)      using nitrate (denitrification); sub-process for  
atmos\_tot nitrogen

continued on next page...

## Tracer equations, continued from previous page

```

+                                recycling of sedimentary pocn to dic and NH4
p_sed_pocn_sulf_atmos_tot_N/(cusing sulfate (sulfate reduction); sub-process
cgt_density)                    for atmos_tot nitrogen

+ p_don_resp_atmos_tot_N        respiration of DON; sub-process for atmos_tot
                                nitrogen

+                                recycling of DON using nitrate (denitrification)
p_don_denit_noN2_atmos_tot_N    ; sub-process for atmos_tot nitrogen

+ p_don_sulf_atmos_tot_N        Mineralization of DON, e-acceptor sulfate
                                (sulfate reduction); sub-process for atmos_tot
                                nitrogen

- p_nh4_assim_lpp*              assimilation of ammonium by large-cell
max(0.0,min(1.0,t_nh4_with_atmphytoplankton
))

- p_nh4_assim_spp*              assimilation of ammonium by small-cell
max(0.0,min(1.0,t_nh4_with_atmphytoplankton
))

- p_nh4_assim_lpp_don*          Production of DON by LPP
max(0.0,min(1.0,t_nh4_with_atr
))

- p_nh4_assim_spp_don*          Production of DON by SPP
max(0.0,min(1.0,t_nh4_with_atr
))

- p_nh4_nit_no3*                nitrification
max(0.0,min(1.0,t_nh4_with_atr
))

-                                coupled nitrification and denitrification after
p_nh4_nitdenit_n2/(cgt_cellheimineralization of detritus in oxic sediments
cgt_density)*
max(0.0,min(1.0,t_nh4_with_atr
))

-                                coupled nitrification and denitrification after
p_nh4_nitdenit_pocn_n2/(cgt_cemineralization of pocn-detritus in oxic
cgt_density)*                    sediments
max(0.0,min(1.0,t_nh4_with_atr
))

```

continued on next page...

## Tracer equations, continued from previous page

**Change of: nitrate; containing nitrogen from (total) atmospheric deposition**

```

 $\frac{d}{dt}$  t_no3_with_atmos_tot_N =
    + p_nh4_nit_no3_atmos_tot_N    nitrification; sub-process for atmos_tot
                                     nitrogen

    - p_no3_assim_lpp*              assimilation of nitrate by large-cell
    max(0.0,min(1.0,t_no3_with_atmphytoplankton
    ))

    - p_no3_assim_spp*              assimilation of nitrate by small-cell
    max(0.0,min(1.0,t_no3_with_atmphytoplankton
    ))

    - p_no3_assim_lpp_don*          Production of DON by LPP
    max(0.0,min(1.0,t_no3_with_atm
    ))

    - p_no3_assim_spp_don*          Production of DON by SPP
    max(0.0,min(1.0,t_no3_with_atm
    ))

    - (p_poc_denit)*(0.8)*          recycling of POC using nitrate (denitrification)
    max(0.0,min(1.0,t_no3_with_atm
    ))

    - (p_pocp_denit)*(84.8)*        recycling of POC using nitrate (denitrification)
    max(0.0,min(1.0,t_no3_with_atm
    ))

    - (p_pocn_denit_wiN2)*(5.3)*    recycling of POCN using nitrate
    max(0.0,min(1.0,t_no3_with_atm(denitrification)
    ))

    - (p_det_denit_nh4)*(5.3)*      recycling of detritus using nitrate
    max(0.0,min(1.0,t_no3_with_atm(denitrification)
    ))

    - (p_sed_denit_nh4_wiN2)*       recycling of sedimentary detritus to ammonium
    (5.3)/(cgt_cellheight*         using nitrate (denitrification)
    cgt_density)*
    max(0.0,min(1.0,t_no3_with_atm
    ))

```

continued on next page...

## Tracer equations, continued from previous page

```

- (p_sed_poc_denit)*(0.8)      recycling of sedimentary poc to dic using
/(cgt_cellheight*cgt_density) nitrate (denitrification)
*
max(0.0,min(1.0,t_no3_with_atr
))

- (p_h2s_oxno3_sul)*(0.4)*      oxidation of hydrogen sulfide with nitrate
max(0.0,min(1.0,t_no3_with_atr
))

- (p_sul_oxno3_so4)*(1.2)*      oxidation of elemental sulfur with nitrate
max(0.0,min(1.0,t_no3_with_atr
))

- (p_sed_pocn_denit_wiN2)*      recycling of sedimentary pocn to dic and NH4
(5.3)/(cgt_cellheight*         using nitrate (denitrification)
cgt_density)*
max(0.0,min(1.0,t_no3_with_atr
))

- (p_sed_pocp_denit)*(84.8)      recycling of sedimentary pocp to dic and PO4
/(cgt_cellheight*cgt_density) using nitrate (denitrification)
*
max(0.0,min(1.0,t_no3_with_atr
))

- (p_doc_denit)*(0.8)*           recycling of DOC using nitrate (denitrification)
max(0.0,min(1.0,t_no3_with_atr
))

- (p_dop_denit)*(84.8)*          recycling of DOP using nitrate (denitrification)
max(0.0,min(1.0,t_no3_with_atr
))

- (p_don_denit_wiN2)*(5.3)*      recycling of DON using nitrate (denitrification)
max(0.0,min(1.0,t_no3_with_atr
))

```

**Change of: small-cell phytoplankton; containing nitrogen from (total) atmospheric deposition**

```

 $\frac{d}{dt}$  t_spp_with_atmos_tot_N =
+ p_no3_assim_spp_atmos_tot_N assimilation of nitrate by small-cell
                                phytoplankton; sub-process for atmos_tot
                                nitrogen

```

continued on next page...

## Tracer equations, continued from previous page

```

+ p_nh4_assim_spp_atmos_tot_N assimilation of ammonium by small-cell
                                phytoplankton; sub-process for atmos_tot
                                nitrogen

- p_spp_graz_zoo*                grazing of zooplankton eating small-cell
max(0.0,min(1.0,t_spp_with_atrphytoplankton
))

- p_spp_resp_nh4*                respiration of small-cell phytoplankton
max(0.0,min(1.0,t_spp_with_atr
))

- p_spp_mort_det*                mortality of small-scale phytoplankton
max(0.0,min(1.0,t_spp_with_atr
))

```

**Change of: zooplankton; containing nitrogen from (total) atmospheric deposition**

```

 $\frac{d}{dt}$  t_zoo_with_atmos_tot_N =
+ p_lpp_graz_zoo_atmos_tot_N grazing of zooplankton eating large-cell
                                phytoplankton; sub-process for atmos_tot
                                nitrogen

+ p_spp_graz_zoo_atmos_tot_N grazing of zooplankton eating small-cell
                                phytoplankton; sub-process for atmos_tot
                                nitrogen

+ p_cya_graz_zoo_atmos_tot_N grazing of zooplankton eating diazotroph
                                cyanobacteria; sub-process for atmos_tot
                                nitrogen

- p_zoo_resp_nh4*                respiration of zooplankton
max(0.0,min(1.0,t_zoo_with_atr
))

- p_zoo_mort_det*                mortality of zooplankton
max(0.0,min(1.0,t_zoo_with_atr
))

```

**Change of: sediment detritus; containing nitrogen from (total) atmospheric deposition**

```

 $\frac{d}{dt}$  t_sed_with_atmos_tot_N =
+ p_det_sedi_sed_atmos_tot_N detritus sedimentation; sub-process for
                                atmos_tot nitrogen

```

continued on next page...



## Tracer equations, continued from previous page

```

- p_sed_resp_nh4*          recycling of sedimentary detritus to ammonium
max(0.0,min(1.0,t_sed_with_atrusing oxygen (respiration)
))

- p_sed_denit_nh4_noN2*    recycling of sedimentary detritus to ammonium
max(0.0,min(1.0,t_sed_with_atrusing nitrate (denitrification)
))

- p_sed_sulf_nh4*          recycling of sedimentary detritus to ammonium
max(0.0,min(1.0,t_sed_with_atrusing sulfate (sulfate reduction)
))

- p_sed_ero_det*           sedimentary detritus erosion
max(0.0,min(1.0,t_sed_with_atr
))

- p_sed_biores_det*        bio resuspension of sedimentary detritus
max(0.0,min(1.0,t_sed_with_atr
))

- p_sed_burial*            burial of detritus deeper than max_sed
max(0.0,min(1.0,t_sed_with_atr
))

```

**Change of: sediment particular organic N+C; containing nitrogen from (total) atmospheric deposition**

```

 $\frac{d}{dt}$  t_sed_pocn_with_atmos_tot_N =
+ p_pocn_sedi_sed_atmos_tot_N pocn sedimentation; sub-process for atmos_tot
nitrogen

- p_sed_ero_pocn*          sedimentary pocn erosion
max(0.0,min(1.0,t_sed_pocn_wit pocn)
))

- p_sed_biores_pocn*       bio resuspension of sedimentary pocn
max(0.0,min(1.0,t_sed_pocn_wit pocn)
))

- p_pocn_burial*           burial of pocn deeper than max_sed
max(0.0,min(1.0,t_sed_pocn_wit pocn)
))

```

continued on next page...

## Tracer equations, continued from previous page

```

- p_sed_pocn_resp*          recycling of sedimentary pocn to dic and NH4
max(0.0,min(1.0,t_sed_pocn_witusing oxygen (respiration)          pocn)
))

- p_sed_pocn_denit_noN2*    recycling of sedimentary pocn to dic and NH4
max(0.0,min(1.0,t_sed_pocn_witusing nitrate (denitrification)      pocn)
))

```

**Change of: dissolved molecular nitrogen; containing nitrogen from atmospheric deposition, which has been previously emitted by ships**

```

 $\frac{d}{dt}$  t_n2_with_atmos_ship_N =
- (p_n2_assim_cya)*(0.5)*    fixation of dinitrogen by diazotroph
max(0.0,min(1.0,t_n2_with_atmccyanobacteria
))

```

**Change of: ammonium; containing nitrogen from atmospheric deposition, which has been previously emitted by ships**

```

 $\frac{d}{dt}$  t_nh4_with_atmos_ship_N =
+ p_pocn_resp_atmos_ship_N    respiration of POCN; sub-process for
                                atmos_ship nitrogen

+                               recycling of POCN using nitrate
p_pocn_denit_noN2_atmos_ship_N(denitrification); sub-process for atmos_ship
                                nitrogen

+ p_pocn_sulf_atmos_ship_N    Mineralization of POCN, e-acceptor sulfate
                                (sulfate reduction); sub-process for atmos_ship
                                nitrogen

+                               respiration of large-cell phytoplankton; sub-
(p_lpp_resp_nh4_atmos_ship_N) process for atmos_ship nitrogen
*((1-don_fraction))

+                               respiration of small-cell phytoplankton; sub-
(p_spp_resp_nh4_atmos_ship_N) process for atmos_ship nitrogen
*((1-don_fraction))

+                               respiration of diazotroph cyanobacteria; sub-
(p_cya_resp_nh4_atmos_ship_N) process for atmos_ship nitrogen
*((1-don_fraction))

```

continued on next page...

## Tracer equations, continued from previous page

```

+                                respiration of zooplankton; sub-process for
(p_zoo_resp_nh4_atmos_ship_N) atmos_ship nitrogen
*((1-don_fraction))

+ p_det_resp_nh4_atmos_ship_N recycling of detritus using oxygen (respiration);
                                sub-process for atmos_ship nitrogen

+ p_det_sulf_nh4_atmos_ship_N recycling of detritus using sulfate (sulfate
                                reduction); sub-process for atmos_ship
                                nitrogen

+                                recycling of sedimentary detritus to ammonium
p_sed_resp_nh4_atmos_ship_N/(using oxygen (respiration); sub-process for
cgt_density)                                atmos_ship nitrogen

+                                recycling of sedimentary detritus to ammonium
p_sed_denit_nh4_noN2_atmos_ship_N/(using nitrate (denitrification); sub-process for
cgt_density)                                atmos_ship nitrogen

+                                recycling of sedimentary detritus to ammonium
p_sed_sulf_nh4_atmos_ship_N/(using sulfate (sulfate reduction); sub-process
cgt_density)                                for atmos_ship nitrogen

+                                recycling of sedimentary pocn to dic and NH4
p_sed_pocn_resp_atmos_ship_N/(using oxygen (respiration); sub-process for
cgt_density)                                atmos_ship nitrogen

+                                recycling of sedimentary pocn to dic and NH4
p_sed_pocn_denit_noN2_atmos_ship_N/(using nitrate (denitrification); sub-process for
cgt_density)                                atmos_ship nitrogen

+                                recycling of sedimentary pocn to dic and NH4
p_sed_pocn_sulf_atmos_ship_N/(using sulfate (sulfate reduction); sub-process
cgt_density)                                for atmos_ship nitrogen

+ p_don_resp_atmos_ship_N        respiration of DON; sub-process for
                                atmos_ship nitrogen

+                                recycling of DON using nitrate (denitrification)
p_don_denit_noN2_atmos_ship_N ; sub-process for atmos_ship nitrogen

+ p_don_sulf_atmos_ship_N        Mineralization of DON, e-acceptor sulfate
                                (sulfate reduction); sub-process for atmos_ship
                                nitrogen

```

continued on next page...

## Tracer equations, continued from previous page

```

- p_nh4_assim_lpp*          assimilation of ammonium by large-cell
max(0.0,min(1.0,t_nh4_with_atrphytoplankton
))

- p_nh4_assim_spp*          assimilation of ammonium by small-cell
max(0.0,min(1.0,t_nh4_with_atrphytoplankton
))

- p_nh4_assim_lpp_don*      Production of DON by LPP
max(0.0,min(1.0,t_nh4_with_atr
))

- p_nh4_assim_spp_don*      Production of DON by SPP
max(0.0,min(1.0,t_nh4_with_atr
))

- p_nh4_nit_no3*           nitrification
max(0.0,min(1.0,t_nh4_with_atr
))

-                           coupled nitrification and denitrification after
p_nh4_nitdenit_n2/(cgt_cellheimineralization of detritus in oxic sediments
cgt_density)*
max(0.0,min(1.0,t_nh4_with_atr
))

-                           coupled nitrification and denitrification after
p_nh4_nitdenit_pocn_n2/(cgt_cemineralization of pocn-detritus in oxic
cgt_density)*              sediments
max(0.0,min(1.0,t_nh4_with_atr
))

```

**Change of: nitrate; containing nitrogen from atmospheric deposition, which has been previously emitted by ships**

```

 $\frac{d}{dt}$  t_no3_with_atmos_ship_N =
+ p_nh4_nit_no3_atmos_ship_N  nitrification; sub-process for atmos_ship
                               nitrogen

- p_no3_assim_lpp*            assimilation of nitrate by large-cell
max(0.0,min(1.0,t_no3_with_atrphytoplankton
))

- p_no3_assim_spp*            assimilation of nitrate by small-cell
max(0.0,min(1.0,t_no3_with_atrphytoplankton
))

```

continued on next page...

## Tracer equations, continued from previous page

```

- p_no3_assim_lpp_don*      Production of DON by LPP
max(0.0,min(1.0,t_no3_with_atr
))

- p_no3_assim_spp_don*      Production of DON by SPP
max(0.0,min(1.0,t_no3_with_atr
))

- (p_poc_denit)*(0.8)*      recycling of POC using nitrate (denitrification)
max(0.0,min(1.0,t_no3_with_atr
))

- (p_pocp_denit)*(84.8)*    recycling of POC using nitrate (denitrification)
max(0.0,min(1.0,t_no3_with_atr
))

- (p_pocn_denit_wiN2)*(5.3)* recycling of POCN using nitrate
max(0.0,min(1.0,t_no3_with_atr(denitrification)
))

- (p_det_denit_nh4)*(5.3)*   recycling of detritus using nitrate
max(0.0,min(1.0,t_no3_with_atr(denitrification)
))

- (p_sed_denit_nh4_wiN2)*    recycling of sedimentary detritus to ammonium
(5.3)/(cgt_cellheight*      using nitrate (denitrification)
cgt_density)*
max(0.0,min(1.0,t_no3_with_atr
))

- (p_sed_poc_denit)*(0.8)    recycling of sedimentary poc to dic using
/(cgt_cellheight*cgt_density) nitrate (denitrification)
*
max(0.0,min(1.0,t_no3_with_atr
))

- (p_h2s_oxno3_sul)*(0.4)*   oxidation of hydrogen sulfide with nitrate
max(0.0,min(1.0,t_no3_with_atr
))

- (p_sul_oxno3_so4)*(1.2)*   oxidation of elemental sulfur with nitrate
max(0.0,min(1.0,t_no3_with_atr
))

```

continued on next page...

## Tracer equations, continued from previous page

```

- (p_sed_pocn_denit_wiN2)*      recycling of sedimentary pocn to dic and NH4
(5.3)/(cgt_cellheight*         using nitrate (denitrification)
cgt_density)*
max(0.0,min(1.0,t_no3_with_atr
))

- (p_sed_pocp_denit)*(84.8)     recycling of sedimentary pocp to dic and PO4
/(cgt_cellheight*cgt_density) using nitrate (denitrification)
*
max(0.0,min(1.0,t_no3_with_atr
))

- (p_doc_denit)*(0.8)*          recycling of DOC using nitrate (denitrification)
max(0.0,min(1.0,t_no3_with_atr
))

- (p_dop_denit)*(84.8)*         recycling of DOP using nitrate (denitrification)
max(0.0,min(1.0,t_no3_with_atr
))

- (p_don_denit_wiN2)*(5.3)*     recycling of DON using nitrate (denitrification)
max(0.0,min(1.0,t_no3_with_atr
))

```

**Change of: small-cell phytoplankton; containing nitrogen from atmospheric deposition, which has been previously emitted by ships**

```

 $\frac{d}{dt}$  t_spp_with_atmos_ship_N =
+                               assimilation of nitrate by small-cell
p_no3_assim_spp_atmos_ship_N  phytoplankton; sub-process for atmos_ship
                               nitrogen

+                               assimilation of ammonium by small-cell
p_nh4_assim_spp_atmos_ship_N  phytoplankton; sub-process for atmos_ship
                               nitrogen

- p_spp_graz_zoo*              grazing of zooplankton eating small-cell
max(0.0,min(1.0,t_spp_with_atrphytoplankton
))

- p_spp_resp_nh4*              respiration of small-cell phytoplankton
max(0.0,min(1.0,t_spp_with_atr
))

```

continued on next page...

## Tracer equations, continued from previous page

```
- p_spp_mort_det*          mortality of small-scale phytoplankton
max(0.0,min(1.0,t_spp_with_atr
))
```

**Change of: zooplankton; containing nitrogen from atmospheric deposition, which has been previously emitted by ships**

```
 $\frac{d}{dt}$  t_zoo_with_atmos_ship_N =
+ p_lpp_graz_zoo_atmos_ship_N grazing of zooplankton eating large-cell
                                phytoplankton; sub-process for atmos_ship
                                nitrogen

+ p_spp_graz_zoo_atmos_ship_N grazing of zooplankton eating small-cell
                                phytoplankton; sub-process for atmos_ship
                                nitrogen

+ p_cya_graz_zoo_atmos_ship_N grazing of zooplankton eating diazotroph
                                cyanobacteria; sub-process for atmos_ship
                                nitrogen

- p_zoo_resp_nh4*          respiration of zooplankton
max(0.0,min(1.0,t_zoo_with_atr
))

- p_zoo_mort_det*          mortality of zooplankton
max(0.0,min(1.0,t_zoo_with_atr
))
```

**Change of: sediment detritus; containing nitrogen from atmospheric deposition, which has been previously emitted by ships**

```
 $\frac{d}{dt}$  t_sed_with_atmos_ship_N =
+ p_det_sedi_sed_atmos_ship_N detritus sedimentation; sub-process for
                                atmos_ship nitrogen

- p_sed_resp_nh4*          recycling of sedimentary detritus to ammonium
max(0.0,min(1.0,t_sed_with_atrusing oxygen (respiration)
))

- p_sed_denit_nh4_noN2*    recycling of sedimentary detritus to ammonium
max(0.0,min(1.0,t_sed_with_atrusing nitrate (denitrification)
))
```

continued on next page...

## Tracer equations, continued from previous page

```

- p_sed_sulf_nh4*          recycling of sedimentary detritus to ammonium
max(0.0,min(1.0,t_sed_with_atrusing sulfate (sulfate reduction)
))

- p_sed_ero_det*          sedimentary detritus erosion
max(0.0,min(1.0,t_sed_with_atr
))

- p_sed_biores_det*       bio resuspension of sedimentary detritus
max(0.0,min(1.0,t_sed_with_atr
))

- p_sed_burial*          burial of detritus deeper than max_sed
max(0.0,min(1.0,t_sed_with_atr
))

```

**Change of: sediment particular organic N+C; containing nitrogen from atmospheric deposition, which has been previously emitted by ships**

```

 $\frac{d}{dt}$  t_sed_pocn_with_atmos_ship_N =
+          pocn sedimentation; sub-process for
p_pocn_sedi_sed_atmos_ship_N  atmos_ship nitrogen

- p_sed_ero_pocn*          sedimentary pocn erosion
max(0.0,min(1.0,t_sed_pocn_wit          pocn)
))

- p_sed_biores_pocn*       bio resuspension of sedimentary pocn
max(0.0,min(1.0,t_sed_pocn_wit          pocn)
))

- p_pocn_burial*          burial of pocn deeper than max_sed
max(0.0,min(1.0,t_sed_pocn_wit          pocn)
))

- p_sed_pocn_resp*        recycling of sedimentary pocn to dic and NH4
max(0.0,min(1.0,t_sed_pocn_witusing oxygen (respiration)          pocn)
))

- p_sed_pocn_denit_noN2*   recycling of sedimentary pocn to dic and NH4
max(0.0,min(1.0,t_sed_pocn_witusing nitrate (denitrification)          pocn)
))

```

continued on next page...



## Tracer equations, continued from previous page

**Change of: suspended iron phosphate**

$$\begin{aligned} \frac{d}{dt} t_{ipw} = & \\ & + \text{erosion of iron PO4} \\ & p_{ips\_ero\_ipw}/(cgt\_cellheight* \\ & cgt\_density) \\ & + \text{bio resuspension of iron PO4} \\ & p_{ips\_biores\_ipw}/(cgt\_cellheig \\ & cgt\_density) \\ & - \text{sedimentation of iron PO4} \\ & p_{ipw\_sedi\_ips}/(cgt\_cellheight \\ & cgt\_density) \end{aligned}$$

**Change of: nitrogen in particulate organic carbon in Redfield ratio; containing nitrogen from (total) atmospheric deposition**

$$\begin{aligned} \frac{d}{dt} t_{pocn\_with\_atmos\_tot\_N} = & \\ & + \text{sedimentary pocn erosion; sub-process for} \\ & p_{sed\_ero\_pocn\_atmos\_tot\_N}/(cgatmos\_tot \text{ nitrogen} \\ & cgt\_density) \\ & + \text{bio resuspension of sedimentary pocn; sub-} \\ & p_{sed\_biores\_pocn\_atmos\_tot\_N}/\text{process for } atmos\_tot \text{ nitrogen} \\ & cgt\_density) \\ & + p_{don2pocn\_atmos\_tot\_N} \quad \text{particle formation from DON; sub-process for} \\ & \quad \text{atmos\_tot nitrogen} \\ & - p_{pocn\_resp} \quad \text{respiration of POCN} \\ & \max(0.0, \min(1.0, t_{pocn\_with\_at} \\ & )) \\ & - p_{pocn\_denit\_noN2} \quad \text{recycling of POCN using nitrate} \\ & \max(0.0, \min(1.0, t_{pocn\_with\_at}(\text{denitrification}) \\ & )) \\ & - p_{pocn\_sulf} \quad \text{Mineralization of POCN, e-acceptor sulfate} \\ & \max(0.0, \min(1.0, t_{pocn\_with\_at}(\text{sulfate reduction}) \\ & )) \\ & - \text{pocn sedimentation} \\ & p_{pocn\_sedi\_sed}/(cgt\_cellheigh \\ & cgt\_density)* \\ & \max(0.0, \min(1.0, t_{pocn\_with\_at} \\ & )) \end{aligned}$$

continued on next page...

## Tracer equations, continued from previous page

```

-                                recycling of sedimentary pocn to dic and NH4
p_sed_pocn_sulf/(cgt_cellheightusing sulfate (sulfate reduction)
cgt_density)*
max(0.0,min(1.0,t_pocn_with_at
))

```

**Change of: large-cell phytoplankton; containing nitrogen from (total) atmospheric deposition**

```

 $\frac{d}{dt}$  t_lpp_with_atmos_tot_N =
+ p_no3_assim_lpp_atmos_tot_N assimilation of nitrate by large-cell
                                phytoplankton; sub-process for atmos_tot
                                nitrogen

+ p_nh4_assim_lpp_atmos_tot_N assimilation of ammonium by large-cell
                                phytoplankton; sub-process for atmos_tot
                                nitrogen

- p_lpp_graz_zoo*                grazing of zooplankton eating large-cell
max(0.0,min(1.0,t_lpp_with_atmphytoplankton
))

- p_lpp_resp_nh4*                respiration of large-cell phytoplankton
max(0.0,min(1.0,t_lpp_with_atr
))

- p_lpp_mort_det*                mortality of large-cell phytoplankton
max(0.0,min(1.0,t_lpp_with_atr
))

```

**Change of: nitrogen in dissolved organic carbon in Redfield ratio; containing nitrogen from (total) atmospheric deposition**

```

 $\frac{d}{dt}$  t_don_with_atmos_tot_N =
+                                Production of DON by LPP; sub-process for
p_nh4_assim_lpp_don_atmos_tot_atmos_tot nitrogen

+                                Production of DON by LPP; sub-process for
p_no3_assim_lpp_don_atmos_tot_atmos_tot nitrogen

+                                Production of DON by SPP; sub-process for
p_nh4_assim_spp_don_atmos_tot_atmos_tot nitrogen

+                                Production of DON by SPP; sub-process for
p_no3_assim_spp_don_atmos_tot_atmos_tot nitrogen

```

continued on next page...

## Tracer equations, continued from previous page

```

+                                respiration of large-cell phytoplankton; sub-
(p_lpp_resp_nh4_atmos_tot_N)* process for atmos_tot nitrogen
(don_fraction)

+                                respiration of small-cell phytoplankton; sub-
(p_spp_resp_nh4_atmos_tot_N)* process for atmos_tot nitrogen
(don_fraction)

+                                respiration of diazotroph cyanobacteria; sub-
(p_cya_resp_nh4_atmos_tot_N)* process for atmos_tot nitrogen
(don_fraction)

+                                respiration of zooplankton; sub-process for
(p_zoo_resp_nh4_atmos_tot_N)* atmos_tot nitrogen
(don_fraction)

- p_don2pocn*                    particle formation from DON
max(0.0,min(1.0,t_don_with_atr
))

- p_don_resp*                    respiration of DON
max(0.0,min(1.0,t_don_with_atr
))

- p_don_denit_noN2*              recycling of DON using nitrate (denitrification)
max(0.0,min(1.0,t_don_with_atr
))

- p_don_sulf*                    Mineralization of DON, e-acceptor sulfate
max(0.0,min(1.0,t_don_with_atr(sulfate reduction)
))

```

**Change of: diazotroph cyanobacteria; containing nitrogen from (total)****atmospheric deposition**

```

 $\frac{d}{dt}$  t_cya_with_atmos_tot_N =
- p_cya_graz_zoo*                grazing of zooplankton eating diazotroph
max(0.0,min(1.0,t_cya_with_atr)cyanobacteria
))

- p_cya_resp_nh4*                respiration of diazotroph cyanobacteria
max(0.0,min(1.0,t_cya_with_atr
))

```

continued on next page...

## Tracer equations, continued from previous page

```

- p_cya_mort_det*          mortality of diazotroph cyanobacteria
max(0.0,min(1.0,t_cya_with_atr
))

- p_cya_mort_det_diff*     mortality of diazotroph cyanobacteria due to
max(0.0,min(1.0,t_cya_with_atr)strong turbulence
))

```

**Change of: detritus; containing nitrogen from (total) atmospheric deposition**

```

 $\frac{d}{dt}$  t_det_with_atmos_tot_N =
+ p_lpp_mort_det_atmos_tot_N  mortality of large-cell phytoplankton; sub-
                               process for atmos_tot nitrogen

+ p_spp_mort_det_atmos_tot_N  mortality of small-scale phytoplankton; sub-
                               process for atmos_tot nitrogen

+ p_cya_mort_det_atmos_tot_N  mortality of diazotroph cyanobacteria; sub-
                               process for atmos_tot nitrogen

+                               mortality of diazotroph cyanobacteria due to
p_cya_mort_det_diff_atmos_tot_strong turbulence; sub-process for atmos_tot
                               nitrogen

+ p_zoo_mort_det_atmos_tot_N  mortality of zooplankton; sub-process for
                               atmos_tot nitrogen

+                               sedimentary detritus erosion; sub-process for
p_sed_ero_det_atmos_tot_N/(cgtatmos_tot nitrogen
cgt_density)

+                               bio resuspension of sedimentary detritus; sub-
p_sed_biores_det_atmos_tot_N/(process for atmos_tot nitrogen
cgt_density)

- p_det_resp_nh4*           recycling of detritus using oxygen (respiration)
max(0.0,min(1.0,t_det_with_atr
))

- p_det_denit_nh4*          recycling of detritus using nitrate
max(0.0,min(1.0,t_det_with_atr)(denitrification)
))

```

continued on next page...

## Tracer equations, continued from previous page

```

- p_det_sulf_nh4*          recycling of detritus using sulfate (sulfate
max(0.0,min(1.0,t_det_with_atmreduction)
))

-                          detritus sedimentation
p_det_sedi_sed/(cgt_cellheight
cgt_density)*
max(0.0,min(1.0,t_det_with_atr
))

```

**Change of: large-cell phytoplankton**

$\frac{d}{dt} t_{lpp} =$

```

+ p_no3_assim_lpp          assimilation of nitrate by large-cell
                           phytoplankton

+ p_nh4_assim_lpp          assimilation of ammonium by large-cell
                           phytoplankton

- p_lpp_graz_zoo           grazing of zooplankton eating large-cell
                           phytoplankton

- p_lpp_resp_nh4           respiration of large-cell phytoplankton

- p_lpp_mort_det           mortality of large-cell phytoplankton

```

**Change of: nitrogen in dissolved organic carbon in Redfield ratio**

$\frac{d}{dt} t_{don} =$

```

+ p_nh4_assim_lpp_don      Production of DON by LPP

+ p_no3_assim_lpp_don      Production of DON by LPP

+ p_nh4_assim_spp_don      Production of DON by SPP

+ p_no3_assim_spp_don      Production of DON by SPP

+ (p_lpp_resp_nh4)*        respiration of large-cell phytoplankton
(don_fraction)

+ (p_spp_resp_nh4)*        respiration of small-cell phytoplankton
(don_fraction)

+ (p_cya_resp_nh4)*        respiration of diazotroph cyanobacteria
(don_fraction)

```

continued on next page...

## Tracer equations, continued from previous page

|                                       |                                                                  |
|---------------------------------------|------------------------------------------------------------------|
| + (p_zoo_resp_nh4)*<br>(don_fraction) | respiration of zooplankton                                       |
| - p_don2pocn                          | particle formation from DON                                      |
| - p_don_resp                          | respiration of DON                                               |
| - p_don_denit_noN2                    | recycling of DON using nitrate (denitrification)                 |
| - p_don_sulf                          | Mineralization of DON, e-acceptor sulfate<br>(sulfate reduction) |

## Change of: diazotroph cyanobacteria

|                          |                                                                   |
|--------------------------|-------------------------------------------------------------------|
| $\frac{d}{dt} t_{cya} =$ |                                                                   |
| + p_n2_assim_cya         | fixation of dinitrogen by diazotroph<br>cyanobacteria             |
| - p_cya_graz_zoo         | grazing of zooplankton eating diazotroph<br>cyanobacteria         |
| - p_cya_resp_nh4         | respiration of diazotroph cyanobacteria                           |
| - p_cya_mort_det         | mortality of diazotroph cyanobacteria                             |
| - p_cya_mort_det_diff    | mortality of diazotroph cyanobacteria due to<br>strong turbulence |

## Change of: detritus

|                                                     |                                                                   |
|-----------------------------------------------------|-------------------------------------------------------------------|
| $\frac{d}{dt} t_{det} =$                            |                                                                   |
| + p_lpp_mort_det                                    | mortality of large-cell phytoplankton                             |
| + p_spp_mort_det                                    | mortality of small-scale phytoplankton                            |
| + p_cya_mort_det                                    | mortality of diazotroph cyanobacteria                             |
| + p_cya_mort_det_diff                               | mortality of diazotroph cyanobacteria due to<br>strong turbulence |
| + p_zoo_mort_det                                    | mortality of zooplankton                                          |
| +<br>p_sed_ero_det/(cgt_cellheight*<br>cgt_density) | sedimentary detritus erosion                                      |

continued on next page...

## Tracer equations, continued from previous page

|                                                              |                                                         |
|--------------------------------------------------------------|---------------------------------------------------------|
| +                                                            | bio resuspension of sedimentary detritus                |
| $p\_sed\_biores\_det / (cgt\_cellheight \cdot cgt\_density)$ |                                                         |
| - $p\_det\_resp\_nh4$                                        | recycling of detritus using oxygen (respiration)        |
| - $p\_det\_denit\_nh4$                                       | recycling of detritus using nitrate (denitrification)   |
| - $p\_det\_sulf\_nh4$                                        | recycling of detritus using sulfate (sulfate reduction) |
| -                                                            | detritus sedimentation                                  |
| $p\_det\_sedi\_sed / (cgt\_cellheight \cdot cgt\_density)$   |                                                         |

## Change of: particulate organic carbon

|                                                              |                                                               |
|--------------------------------------------------------------|---------------------------------------------------------------|
| $\frac{d}{dt} t\_poc =$                                      |                                                               |
| +                                                            | sedimentary poc erosion                                       |
| $p\_sed\_ero\_poc / (cgt\_cellheight \cdot cgt\_density)$    |                                                               |
| +                                                            | bio resuspension of sedimentary poc                           |
| $p\_sed\_biores\_poc / (cgt\_cellheight \cdot cgt\_density)$ |                                                               |
| + $p\_doc2pco$                                               | particle formation from DOC                                   |
| - $p\_poc\_resp$                                             | respiration of POC                                            |
| - $p\_poc\_denit$                                            | recycling of POC using nitrate (denitrification)              |
| - $p\_poc\_sulf$                                             | Mineralization of POC, e-acceptor sulfate (sulfate reduction) |
| -                                                            | poc sedimentation                                             |
| $p\_poc\_sedi\_sed / (cgt\_cellheight \cdot cgt\_density)$   |                                                               |

## Change of: phosphorus in particulate organic carbon in Redfield ratio

|                                                            |                          |
|------------------------------------------------------------|--------------------------|
| $\frac{d}{dt} t\_pocp =$                                   |                          |
| +                                                          | sedimentary pocp erosion |
| $p\_sed\_ero\_pocp / (cgt\_cellheight \cdot cgt\_density)$ |                          |

continued on next page...

## Tracer equations, continued from previous page

|                                                               |                                                                                |
|---------------------------------------------------------------|--------------------------------------------------------------------------------|
| +                                                             | bio resuspension of sedimentary pocp                                           |
| $p\_sed\_biores\_pocp / (cgt\_cellheight \cdot cgt\_density)$ |                                                                                |
| +                                                             | particle formation from DOP                                                    |
| $p\_dop2pocp$                                                 |                                                                                |
| -                                                             | respiration of POCP                                                            |
| $p\_pocp\_resp$                                               |                                                                                |
| -                                                             | recycling of POC using nitrate (denitrification)                               |
| $p\_pocp\_denit$                                              |                                                                                |
| -                                                             | Mineralization of POC, e-acceptor sulfate (sulfate reduction)                  |
| $p\_pocp\_sulf$                                               |                                                                                |
| -                                                             | pocp sedimentation                                                             |
| $p\_pocp\_sedi\_sed / (cgt\_cellheight \cdot cgt\_density)$   |                                                                                |
| -                                                             | recycling of sedimentary pocp to dic and PO4 using sulfate (sulfate reduction) |
| $p\_sed\_pocp\_sulf / (cgt\_cellheight \cdot cgt\_density)$   |                                                                                |

## Change of: nitrogen in particulate organic carbon in Redfield ratio

|                                                               |                                                                |
|---------------------------------------------------------------|----------------------------------------------------------------|
| $\frac{d}{dt} t\_pocn =$                                      |                                                                |
| +                                                             | sedimentary pocn erosion                                       |
| $p\_sed\_ero\_pocn / (cgt\_cellheight \cdot cgt\_density)$    |                                                                |
| +                                                             | bio resuspension of sedimentary pocn                           |
| $p\_sed\_biores\_pocn / (cgt\_cellheight \cdot cgt\_density)$ |                                                                |
| +                                                             | particle formation from DON                                    |
| $p\_don2pocn$                                                 |                                                                |
| -                                                             | respiration of POCN                                            |
| $p\_pocn\_resp$                                               |                                                                |
| -                                                             | recycling of POCN using nitrate (denitrification)              |
| $p\_pocn\_denit\_noN2$                                        |                                                                |
| -                                                             | Mineralization of POCN, e-acceptor sulfate (sulfate reduction) |
| $p\_pocn\_sulf$                                               |                                                                |
| -                                                             | pocn sedimentation                                             |
| $p\_pocn\_sedi\_sed / (cgt\_cellheight \cdot cgt\_density)$   |                                                                |

continued on next page...



## Tracer equations, continued from previous page

- recycling of sedimentary pocn to dic and NH4  
 $p\_sed\_pocn\_sulf/(cgt\_cellheight \times \text{using sulfate (sulfate reduction)})$   
 $cgt\_density)$

**Change of: nitrogen in particulate organic carbon in Redfield ratio; containing nitrogen from atmospheric deposition, which has been previously emitted by ships**

$\frac{d}{dt} t\_pocn\_with\_atmos\_ship\_N =$   
 + sedimentary pocn erosion; sub-process for  
 $p\_sed\_ero\_pocn\_atmos\_ship\_N/(atmos\_ship \text{ nitrogen})$   
 $cgt\_density)$   
 + bio resuspension of sedimentary pocn; sub-  
 $p\_sed\_biores\_pocn\_atmos\_ship\_N \times \text{process for } atmos\_ship \text{ nitrogen}$   
 $cgt\_density)$   
 +  $p\_don2pocn\_atmos\_ship\_N$  particle formation from DON; sub-process for  
 $atmos\_ship \text{ nitrogen}$   
 -  $p\_pocn\_resp \times$  respiration of POCN  
 $\max(0.0, \min(1.0, t\_pocn\_with\_at$   
 $))$   
 -  $p\_pocn\_denit\_noN2 \times$  recycling of POCN using nitrate  
 $\max(0.0, \min(1.0, t\_pocn\_with\_at(\text{denitrification})$   
 $))$   
 -  $p\_pocn\_sulf \times$  Mineralization of POCN, e-acceptor sulfate  
 $\max(0.0, \min(1.0, t\_pocn\_with\_at(\text{sulfate reduction})$   
 $))$   
 - pocn sedimentation  
 $p\_pocn\_sedi\_sed/(cgt\_cellheight$   
 $cgt\_density) \times$   
 $\max(0.0, \min(1.0, t\_pocn\_with\_at$   
 $))$   
 - recycling of sedimentary pocn to dic and NH4  
 $p\_sed\_pocn\_sulf/(cgt\_cellheight \times \text{using sulfate (sulfate reduction)})$   
 $cgt\_density) \times$   
 $\max(0.0, \min(1.0, t\_pocn\_with\_at$   
 $))$

continued on next page...

## Tracer equations, continued from previous page

**Change of: large-cell phytoplankton; containing nitrogen from atmospheric deposition, which has been previously emitted by ships**

$$\begin{aligned} \frac{d}{dt} t\_lpp\_with\_atmos\_ship\_N = & \\ & + \text{assimilation of nitrate by large-cell} \\ & p\_no3\_assim\_lpp\_atmos\_ship\_N \text{ phytoplankton; sub-process for } atmos\_ship \\ & \text{nitrogen} \\ & + \text{assimilation of ammonium by large-cell} \\ & p\_nh4\_assim\_lpp\_atmos\_ship\_N \text{ phytoplankton; sub-process for } atmos\_ship \\ & \text{nitrogen} \\ & - p\_lpp\_graz\_zoo* \text{ grazing of zooplankton eating large-cell} \\ & \text{max}(0.0, \min(1.0, t\_lpp\_with\_atmphytoplankton \\ & )) \\ & - p\_lpp\_resp\_nh4* \text{ respiration of large-cell phytoplankton} \\ & \text{max}(0.0, \min(1.0, t\_lpp\_with\_atr \\ & )) \\ & - p\_lpp\_mort\_det* \text{ mortality of large-cell phytoplankton} \\ & \text{max}(0.0, \min(1.0, t\_lpp\_with\_atr \\ & )) \end{aligned}$$

**Change of: nitrogen in dissolved organic carbon in Redfield ratio; containing nitrogen from atmospheric deposition, which has been previously emitted by ships**

$$\begin{aligned} \frac{d}{dt} t\_don\_with\_atmos\_ship\_N = & \\ & + \text{Production of DON by LPP; sub-process for} \\ & p\_nh4\_assim\_lpp\_don\_atmos\_shipatmos\_ship \text{ nitrogen} \\ & + \text{Production of DON by LPP; sub-process for} \\ & p\_no3\_assim\_lpp\_don\_atmos\_shipatmos\_ship \text{ nitrogen} \\ & + \text{Production of DON by SPP; sub-process for} \\ & p\_nh4\_assim\_spp\_don\_atmos\_shipatmos\_ship \text{ nitrogen} \\ & + \text{Production of DON by SPP; sub-process for} \\ & p\_no3\_assim\_spp\_don\_atmos\_shipatmos\_ship \text{ nitrogen} \\ & + \text{respiration of large-cell phytoplankton; sub-} \\ & (p\_lpp\_resp\_nh4\_atmos\_ship\_N) \text{ process for } atmos\_ship \text{ nitrogen} \\ & *(don\_fraction) \end{aligned}$$

continued on next page...

## Tracer equations, continued from previous page

```

+                                respiration of small-cell phytoplankton; sub-
(p_spp_resp_nh4_atmos_ship_N) process for atmos_ship nitrogen
*(don_fraction)

+                                respiration of diazotroph cyanobacteria; sub-
(p_cya_resp_nh4_atmos_ship_N) process for atmos_ship nitrogen
*(don_fraction)

+                                respiration of zooplankton; sub-process for
(p_zoo_resp_nh4_atmos_ship_N) atmos_ship nitrogen
*(don_fraction)

- p_don2pocn*                    particle formation from DON
max(0.0,min(1.0,t_don_with_atr
))

- p_don_resp*                    respiration of DON
max(0.0,min(1.0,t_don_with_atr
))

- p_don_denit_noN2*              recycling of DON using nitrate (denitrification)
max(0.0,min(1.0,t_don_with_atr
))

- p_don_sulf*                    Mineralization of DON, e-acceptor sulfate
max(0.0,min(1.0,t_don_with_atr(sulfate reduction)
))

```

**Change of: diazotroph cyanobacteria; containing nitrogen from atmospheric deposition, which has been previously emitted by ships**

```

 $\frac{d}{dt}$  t_cya_with_atmos_ship_N =
- p_cya_graz_zoo*                grazing of zooplankton eating diazotroph
max(0.0,min(1.0,t_cya_with_atrcyanobacteria
))

- p_cya_resp_nh4*                respiration of diazotroph cyanobacteria
max(0.0,min(1.0,t_cya_with_atr
))

- p_cya_mort_det*                mortality of diazotroph cyanobacteria
max(0.0,min(1.0,t_cya_with_atr
))

```

continued on next page...

## Tracer equations, continued from previous page

```
- p_cya_mort_det_diff*      mortality of diazotroph cyanobacteria due to
max(0.0,min(1.0,t_cya_with_atr,strong turbulence
))
```

**Change of: detritus; containing nitrogen from atmospheric deposition, which has been previously emitted by ships**

```
 $\frac{d}{dt}$  t_det_with_atmos_ship_N =
+ p_lpp_mort_det_atmos_ship_N mortality of large-cell phytoplankton; sub-
process for atmos_ship nitrogen

+ p_spp_mort_det_atmos_ship_N mortality of small-scale phytoplankton; sub-
process for atmos_ship nitrogen

+ p_cya_mort_det_atmos_ship_N mortality of diazotroph cyanobacteria; sub-
process for atmos_ship nitrogen

+
p_cya_mort_det_diff_atmos_ship_N mortality of diazotroph cyanobacteria due to
strong turbulence; sub-process for atmos_ship
nitrogen

+ p_zoo_mort_det_atmos_ship_N mortality of zooplankton; sub-process for
atmos_ship nitrogen

+
p_sed_ero_det_atmos_ship_N/(cga sedimentary detritus erosion; sub-process for
atmos_ship nitrogen
cgt_density)

+
p_sed_biores_det_atmos_ship_N/(cga bio resuspension of sedimentary detritus; sub-
atmos_ship nitrogen
cgt_density)

- p_det_resp_nh4*      recycling of detritus using oxygen (respiration)
max(0.0,min(1.0,t_det_with_atr
))

- p_det_denit_nh4*      recycling of detritus using nitrate
max(0.0,min(1.0,t_det_with_atr(denitrification)
))

- p_det_sulf_nh4*      recycling of detritus using sulfate (sulfate
max(0.0,min(1.0,t_det_with_atrreduction)
))
```

continued on next page...

## Tracer equations, continued from previous page

```
- detritus sedimentation
p_det_sedi_sed/(cgt_cellheight
cgt_density)*
max(0.0,min(1.0,t_det_with_atr
))
```
