# Supplementary material for: Quantifying the contribution of shipping NO x emissions to the marine nitrogen inventory – a case study for the western Baltic Sea
Source: Copernicus journal article supplement (doi:10.5194/os-16-115-2020), 2020-01-21
Supplement: Supplementary file [file os-16-115-2020-supplement-title-page.pdf › os-16-115-2020-supplement-title-page.pdf]

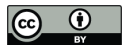

## *Supplement of*

# **Quantifying the contribution of shipping $\text{NO}_x$ emissions to the marine nitrogen inventory – a case study for the western Baltic Sea**

**Daniel Neumann et al.**

*Correspondence to:* Daniel Neumann ([daniel.neumann@dkrz.de](mailto:daniel.neumann@dkrz.de))

- os-16-115-2020-supplement-title-page.pdf
- 0\_supplement
  - ERGOM
    - \* Readme.md
    - \* code
    - \* templates
    - \* textfiles
  - Readme.md
  - s01\_ergom\_doc.pdf
  - s02\_climatologies\_stations\_validation\_surface.pdf
  - s03\_climatologies\_stations\_validation\_bottom.pdf
  - s04\_timeseries\_stations\_validation\_surface.pdf
  - s05\_timeseries\_stations\_validation\_bottom.pdf
  - s06\_timeseries\_dmu547\_details\_bottom.pdf
  - s07\_2012\_stations\_surface\_ship.pdf
  - s08\_2012\_stations\_bottom\_ship.pdf
  - s09\_cross\_section\_ombmpm2\_rel\_ship.pdf

The copyright of individual parts of the supplement might differ from the CC BY 4.0 License.
