# Supplementary figures and images for: Quantifying the contribution of shipping NO x emissions to the marine nitrogen inventory – a case study for the western Baltic Sea
Source: Copernicus journal article supplement (doi:10.5194/os-16-115-2020), 2020-01-21

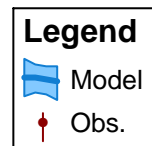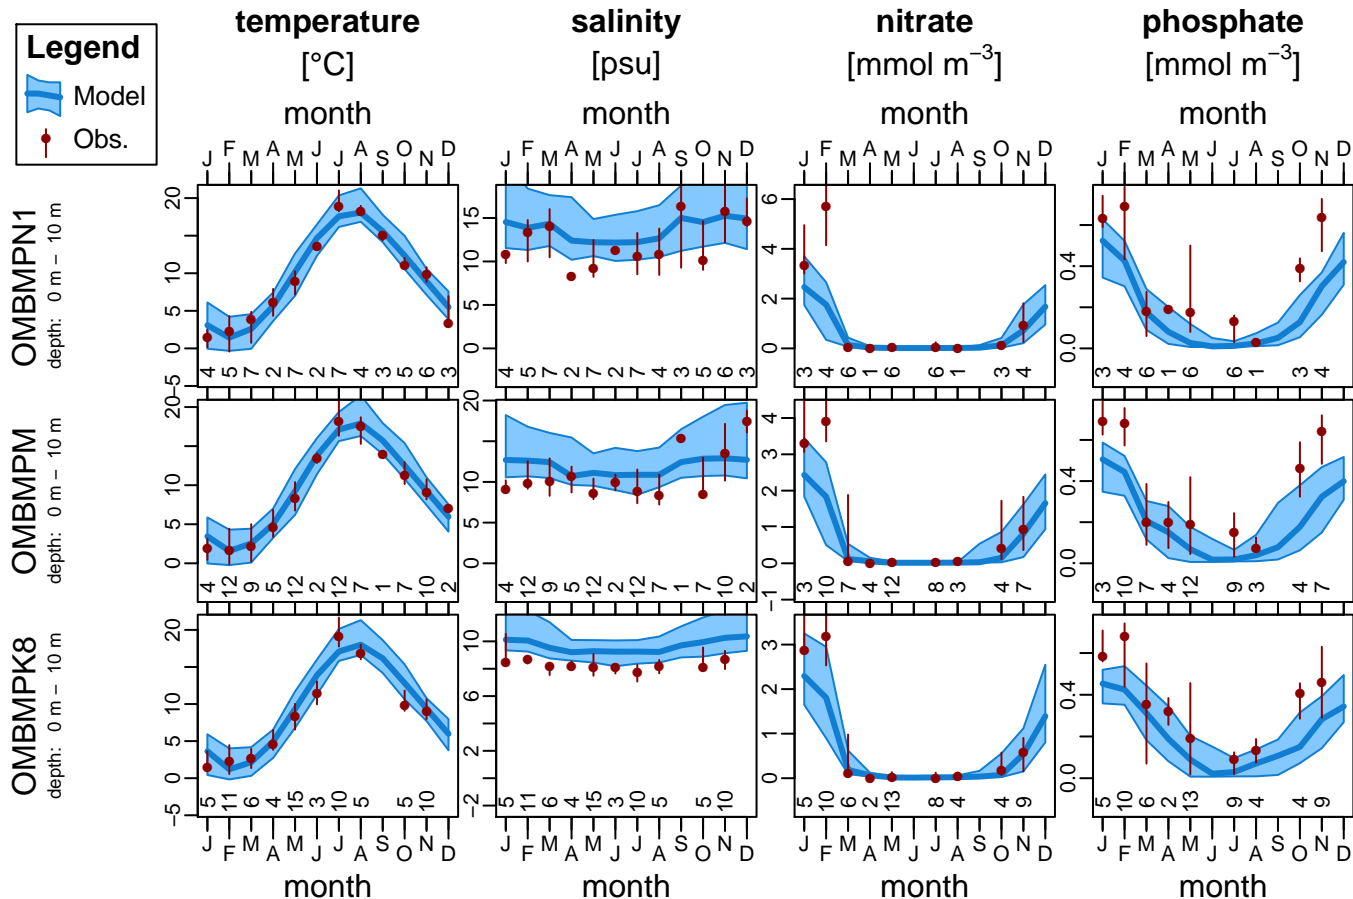

Supplement: Supplementary file 2 [file s02_climatologies_stations_validation_surface.pdf › 0_supplement/s02_climatologies_stations_validation_surface.pdf]

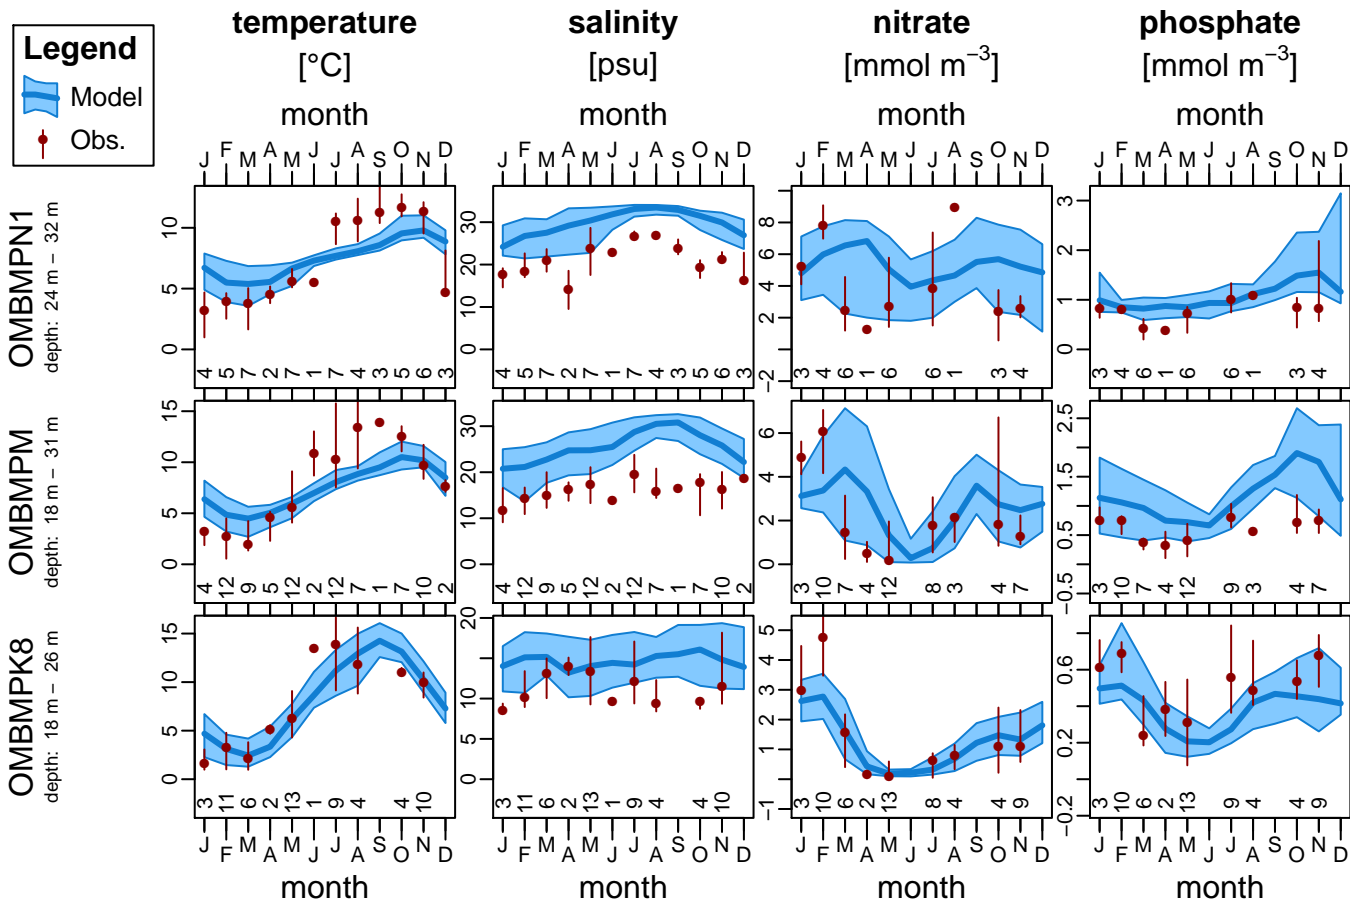

Supplement: Supplementary file 3 [file s03_climatologies_stations_validation_bottom.pdf › 0_supplement/s03_climatologies_stations_validation_bottom.pdf]

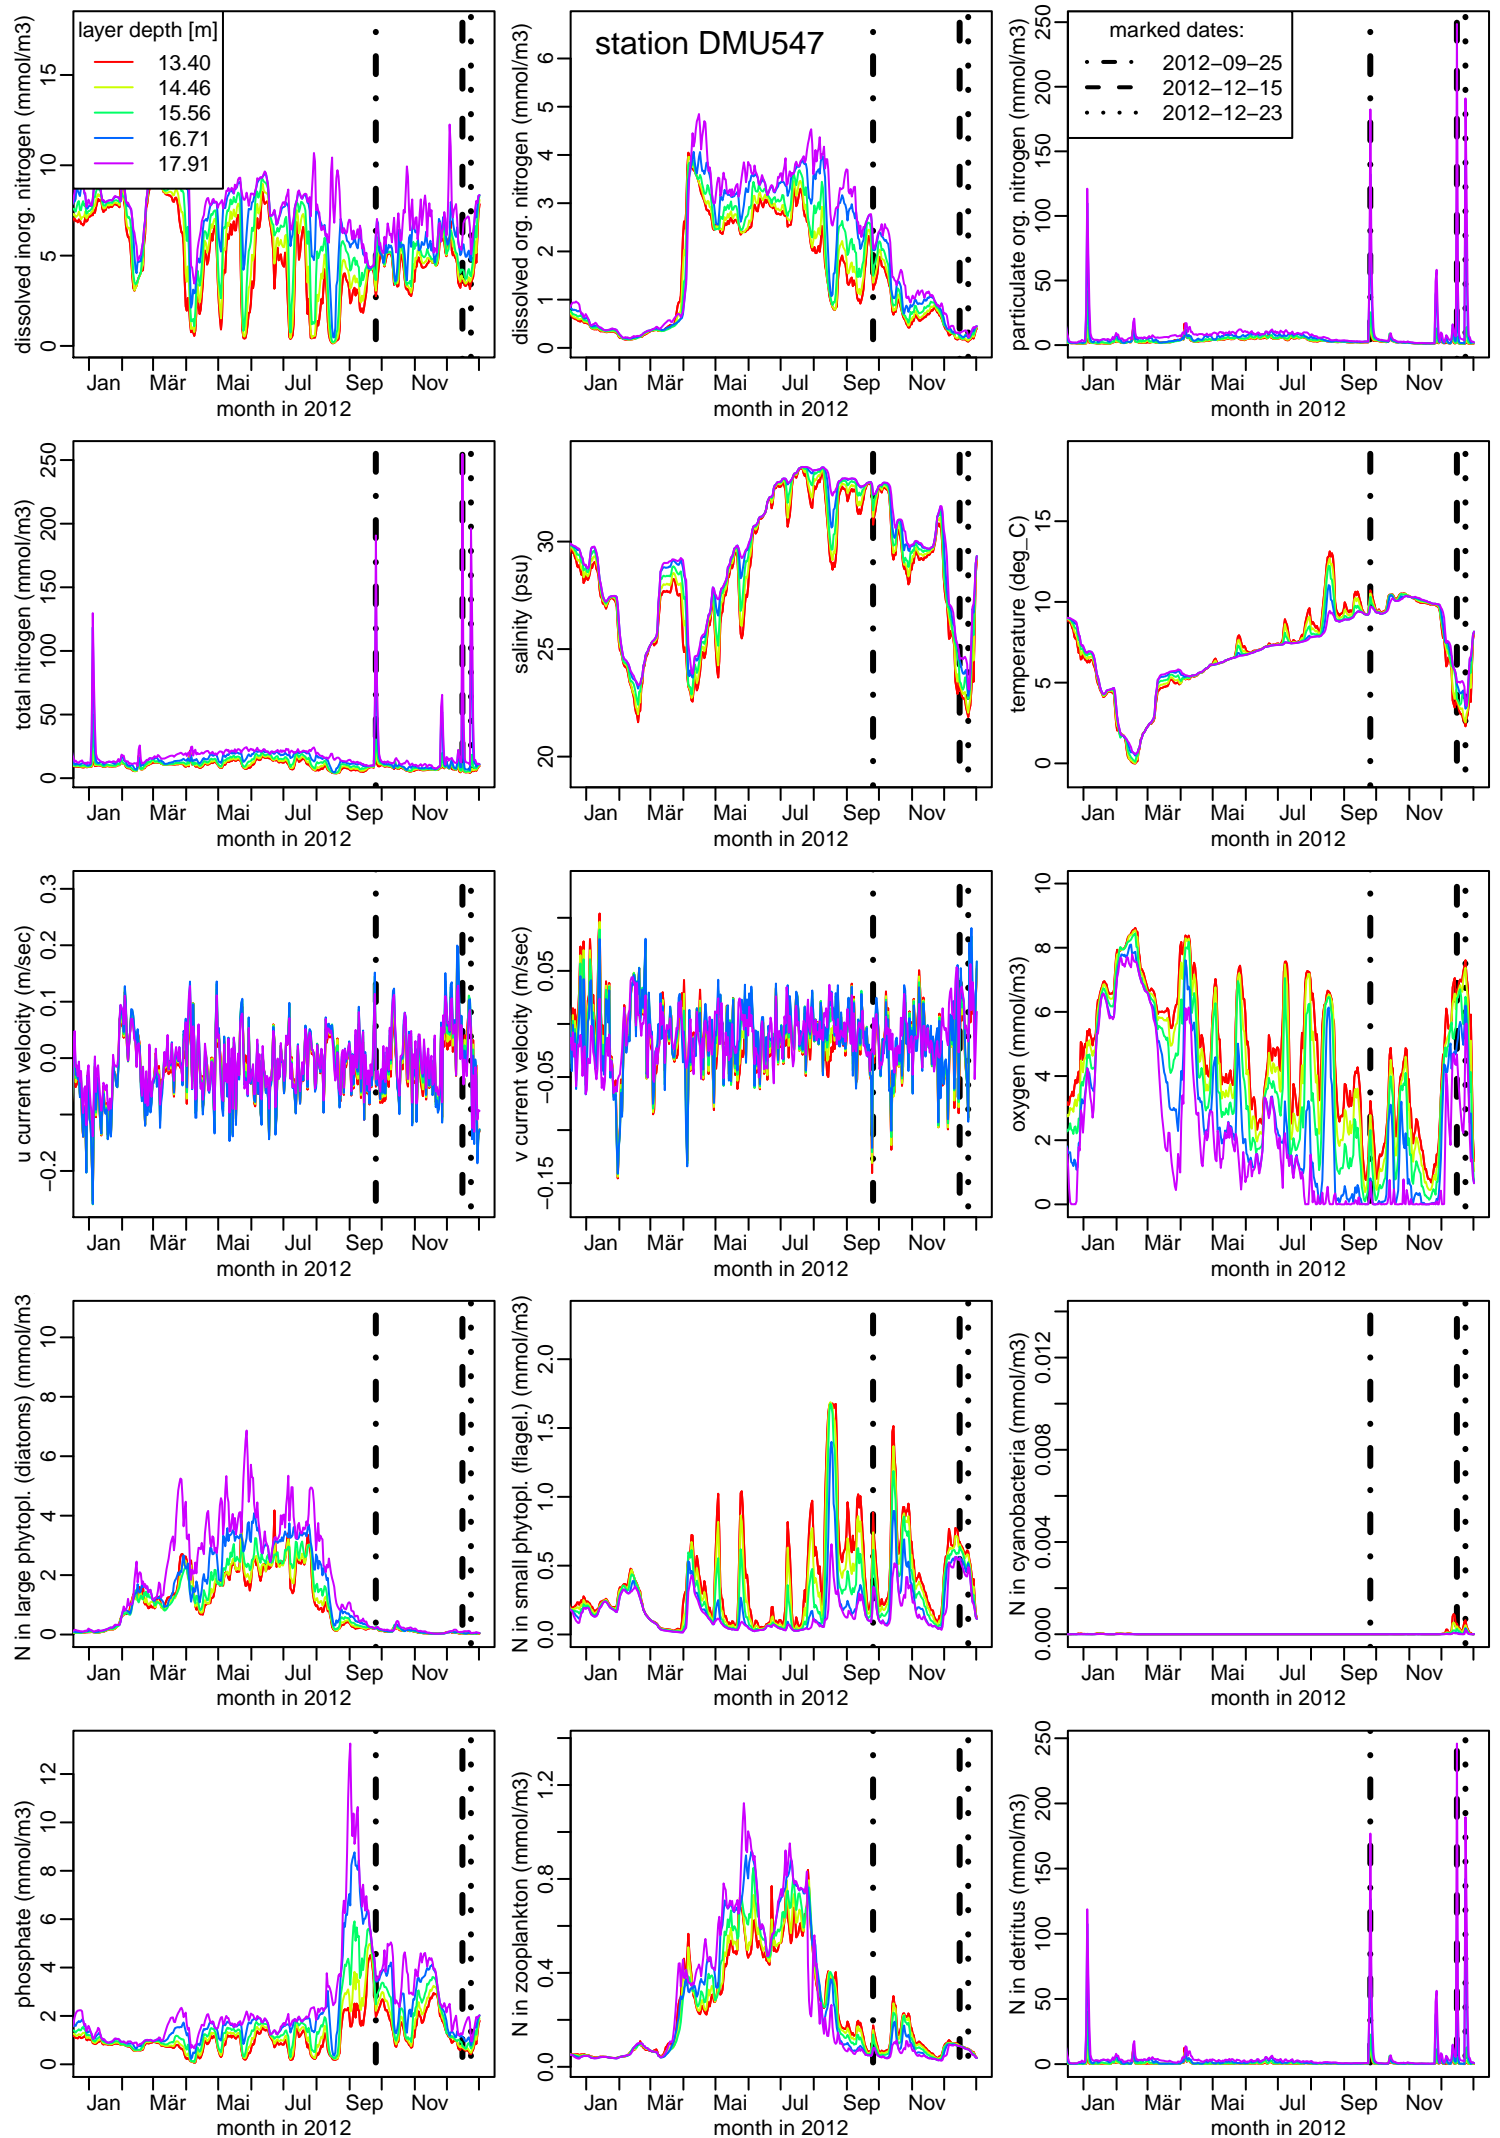

Supplement: Supplementary file 6 [file s06_timeseries_dmu547_details_bottom.pdf › 0_supplement/s06_timeseries_dmu547_details_bottom.pdf]

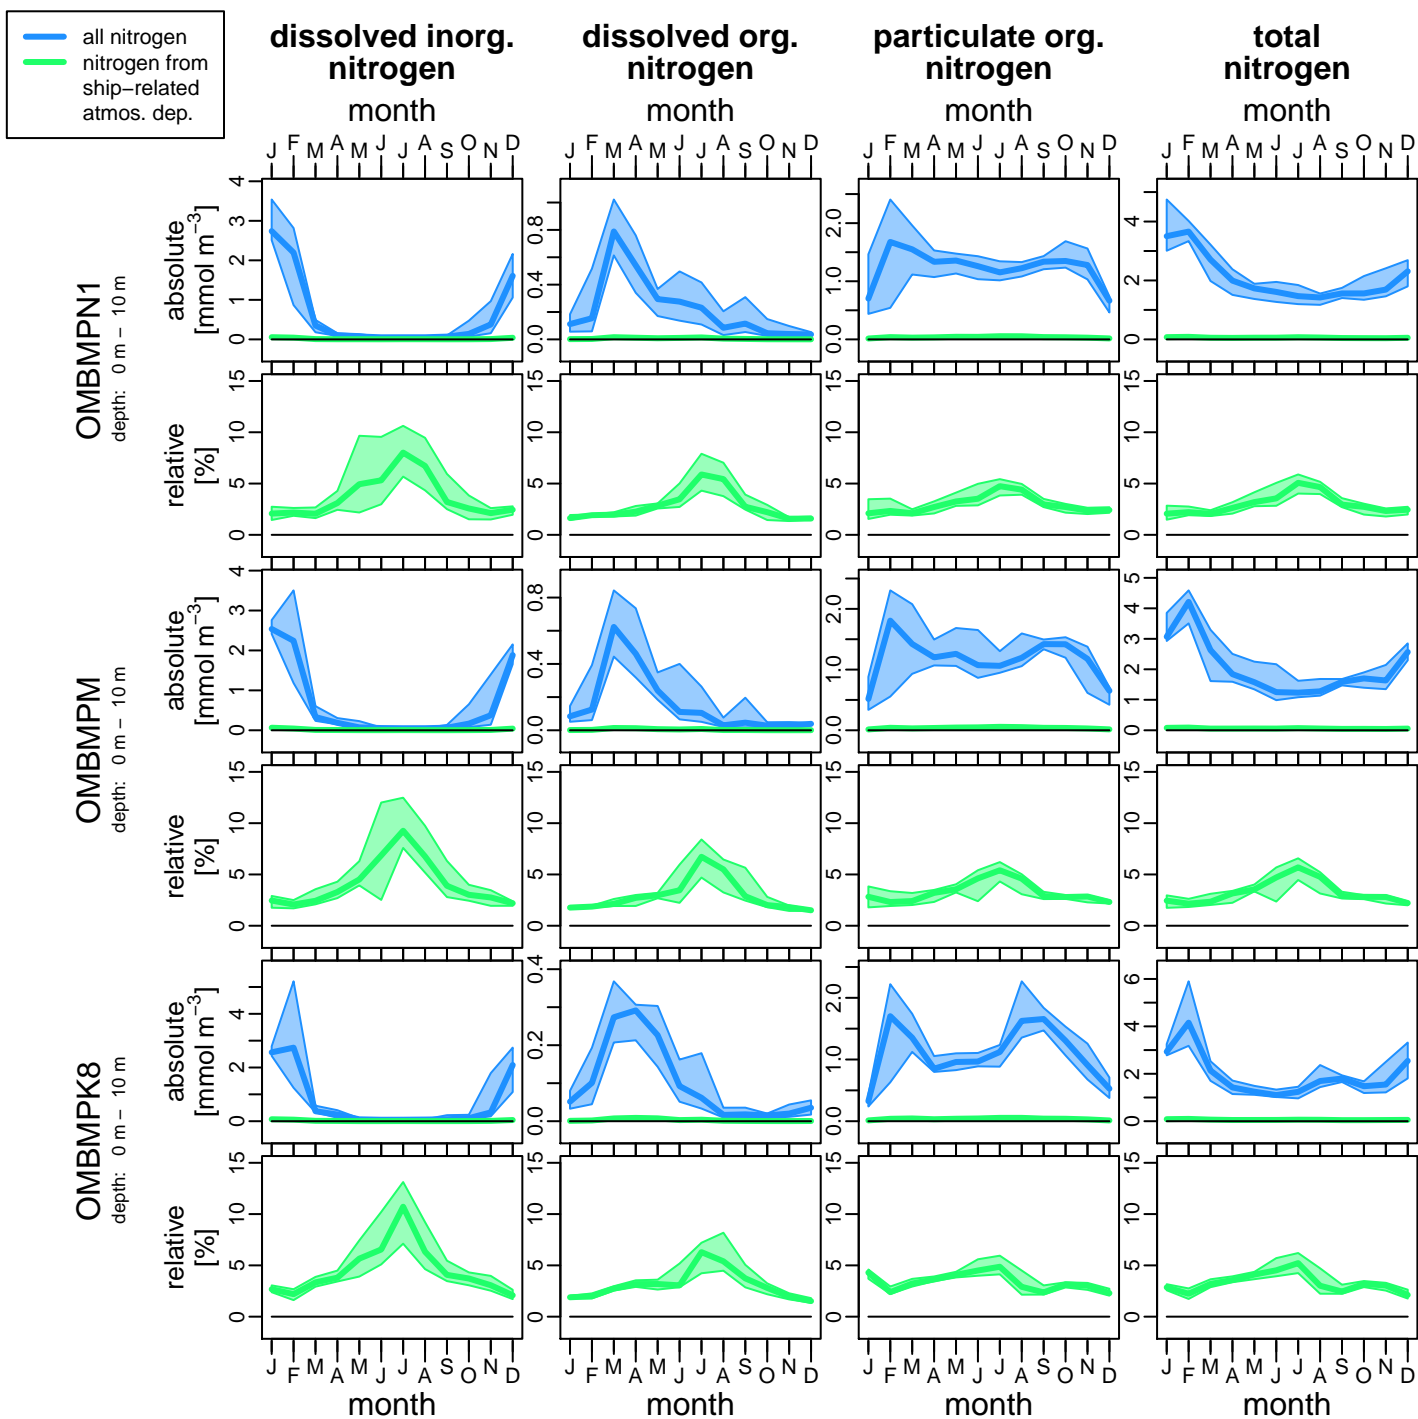

Supplement: Supplementary file 7 [file s07_2012_stations_surface_ship.pdf › 0_supplement/s07_2012_stations_surface_ship.pdf]

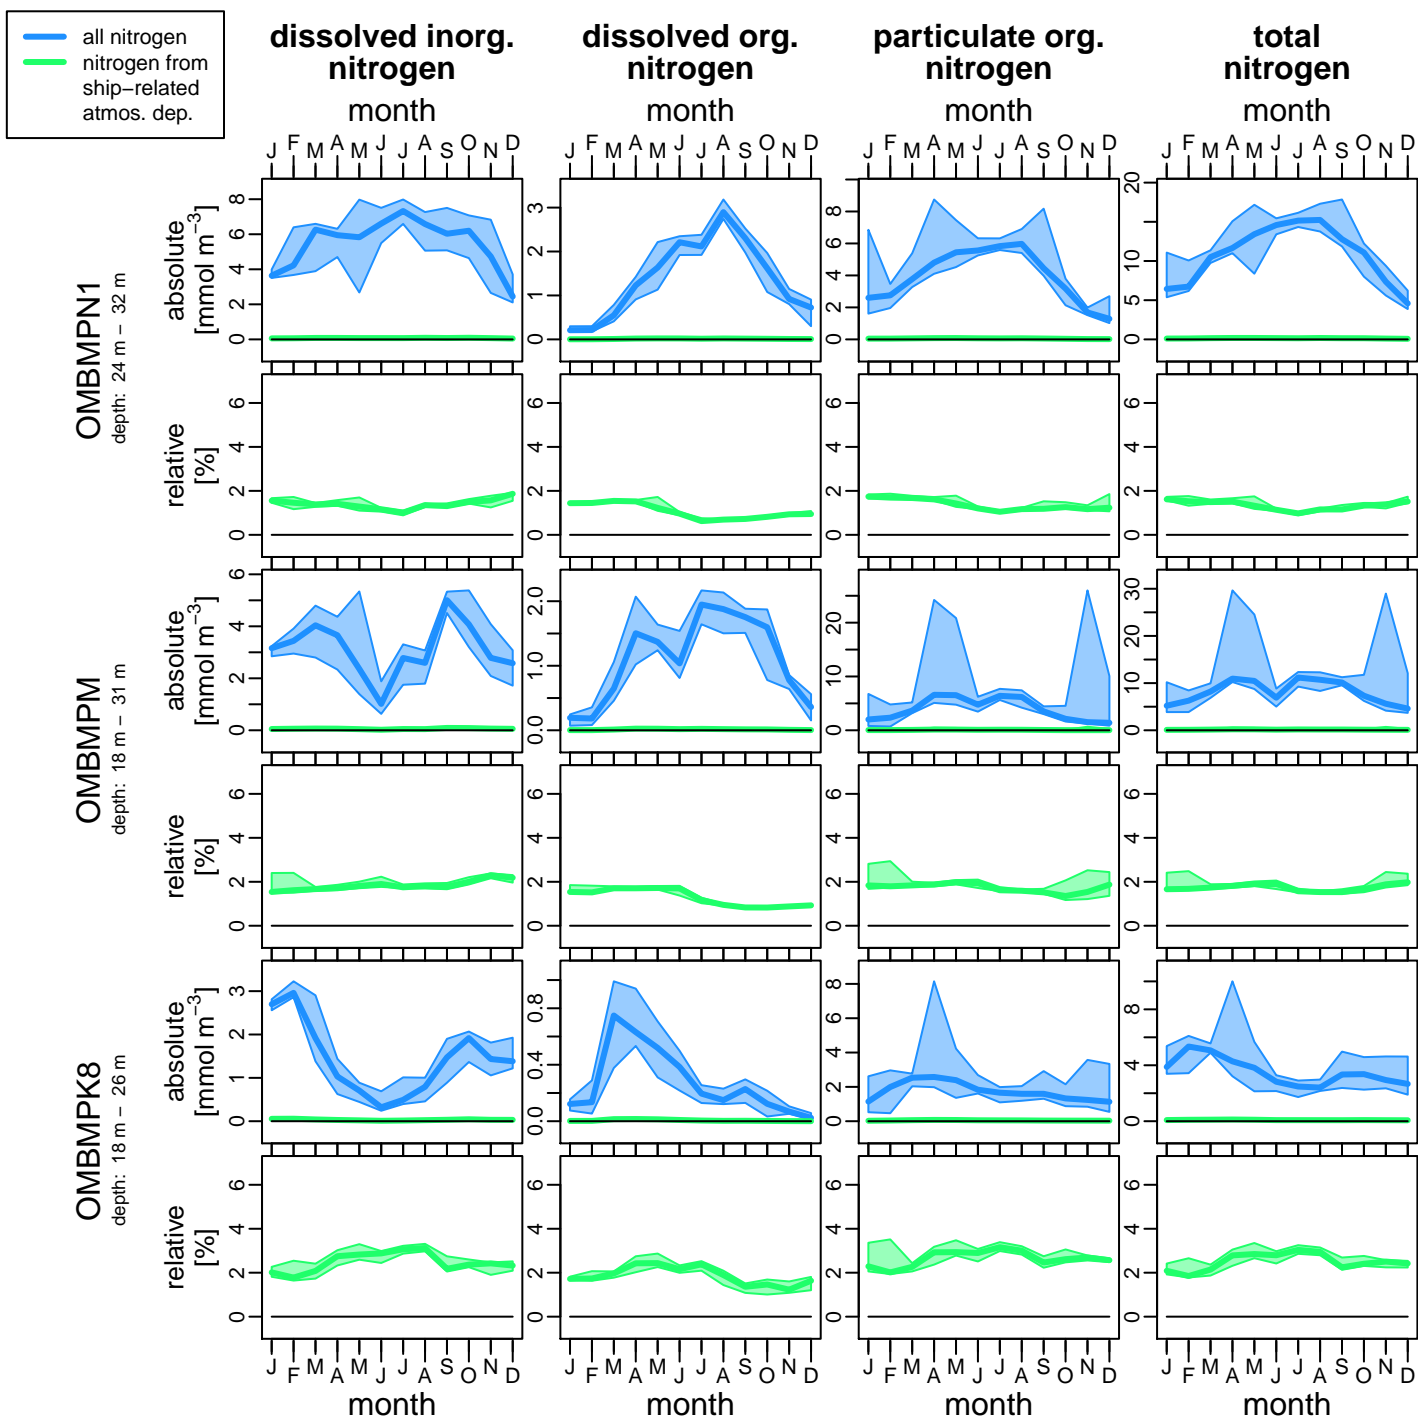

Supplement: Supplementary file 8 [file s08_2012_stations_bottom_ship.pdf › 0_supplement/s08_2012_stations_bottom_ship.pdf]

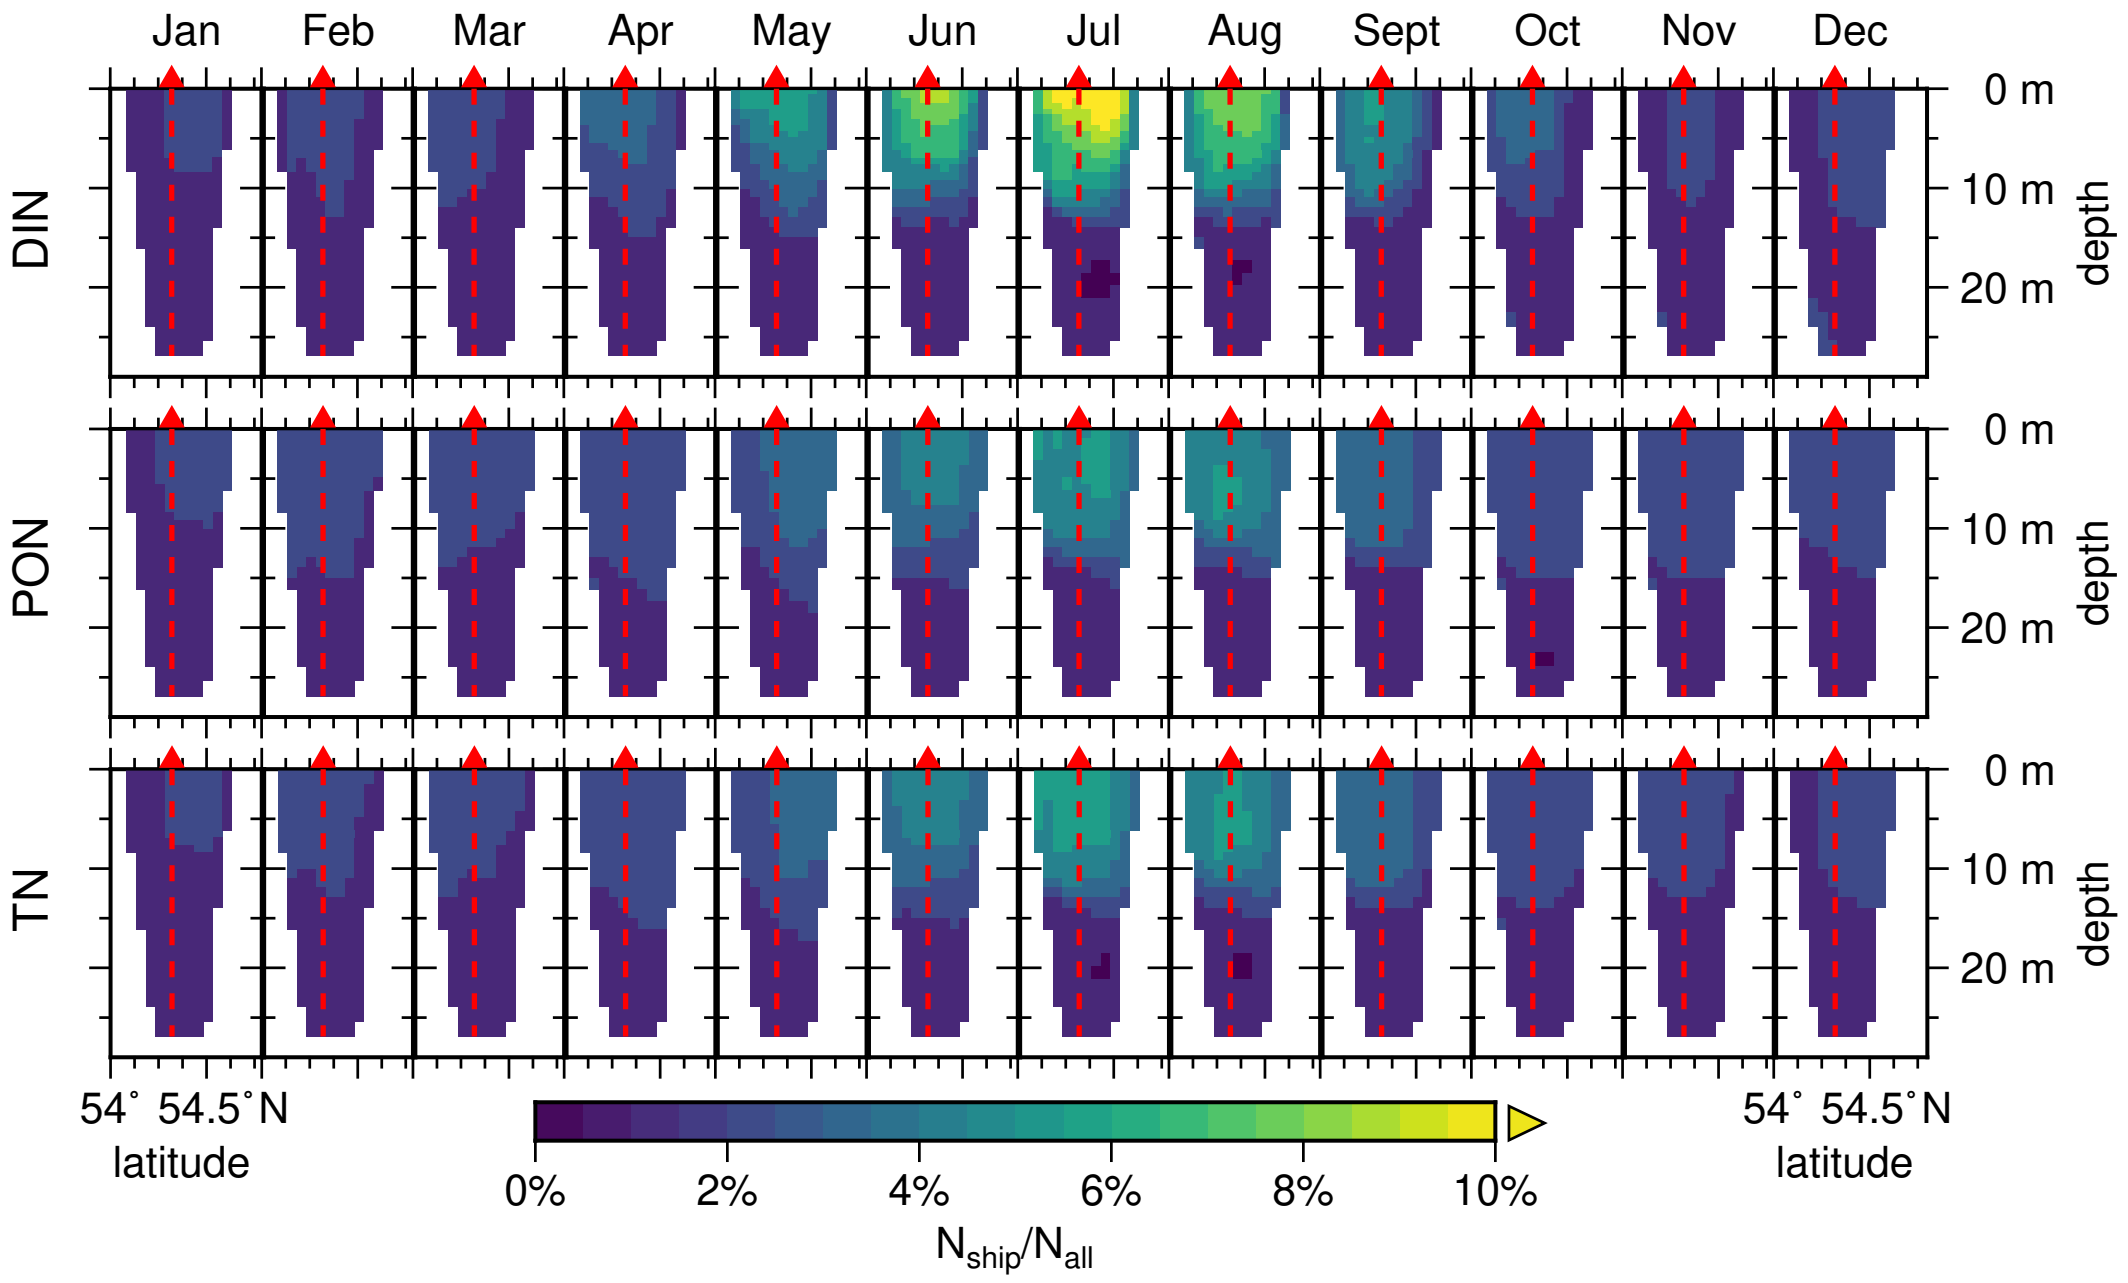

Supplement: Supplementary file 9 [file s09_cross_section_ombmpm2_rel_ship.pdf › 0_supplement/s09_cross_section_ombmpm2_rel_ship.pdf]
